# Supplementary material
Source: publisher figshare collection journal article supplement (https://acs.figshare.com/ndownloader/files/4931008)

# Supporting Information for

## Edible *Inonotus dryadeus* Fungi with Quick Separation of Water Pollutant Oils and Methylene Blue Dye

Balaprasad Ankamwar

*Bio-Inspired Materials Research Laboratory, Department of Chemistry, Savitribai Phule  
Pune University (Formerly University of Pune), Ganeshkhind, Pune-411007, India  
Email: bgankamwar@chem.unipune.ac.in*

### Contents

|                                                                                                                                |    |
|--------------------------------------------------------------------------------------------------------------------------------|----|
| 1. Experimental Section .....                                                                                                  | S1 |
| 1.1. Chemicals and materials.....                                                                                              | S1 |
| 1.2. Isolation of <i>Inonotus dryadeus</i> Fungi from Natural Source.....                                                      | S1 |
| 1.3. Oils and Pesticide Separation Tests.....                                                                                  | S1 |
| 1.4. Dye Separation Test.....                                                                                                  | S2 |
| 2. Physical and Chemical Desorption of MB Dye.....                                                                             | S3 |
| 2.1. Physical Desorption of MB Dye.....                                                                                        | S3 |
| Figure S1. Photographic images of physical desorption of MB dye from.....                                                      | S3 |
| 2.2. Chemical Desorption Study of Methylene Blue Dye.....                                                                      | S4 |
| Figure S2. Chemical desorption study of methylene blue dye adsorbed on DID with<br>different solvents and solutions.....       | S4 |
| 3. DID as a Fuel.....                                                                                                          | S5 |
| Figure S3. Photographic images of burning test of engine oil, used engine oil and DID....                                      | S5 |
| Figure S4. Different photographic images reveal coal like nature of DID as the fuel.....                                       | S6 |
| 4. Reusability Test for Oil Extraction.....                                                                                    | S7 |
| Figure S5. Engine oil adsorbed and extracted from DID followed by combustion tests.....                                        | S7 |
| 5. Quantitative Adsorption of MB Dye.....                                                                                      | S8 |
| Figure S6. UV-Vis spectrum and photographic images of MB solution in the range<br>from 5 – 20 ppm on interaction with DID..... | S8 |

|                                                                                                                                                                           |     |
|---------------------------------------------------------------------------------------------------------------------------------------------------------------------------|-----|
| Table S1. Comparative adsorption investigation and pH effect on removal of dyes.....                                                                                      | S9  |
| Figure S7. Photographic images and UV-Vis spectra of pH effect (2- 12) for MB solution at 5 and 10ppm using HCl and NaOH for pH adjustment.....                           | S10 |
| Figure S8. Photographic images and UV-Vis spectra of pH effect (2- 12) for MB solution at 5 and 10ppm using HCl and ammonia for pH adjustment.....                        | S11 |
| Figure S9. Photographic images and UV-Vis spectra of pH effect (2- 12) for congo red solution at 5 and 10ppm using HCl and ammonia for pH adjustment.....                 | S12 |
| Figure S10. Photographic images and UV-Vis spectra of pH effect (2- 12) for eosin yellowish solution at 5 and 10ppm using HCl and ammonia for pH adjustment.....          | S13 |
| Figure S11. Photographic images and UV-Vis spectra of pH effect (2- 12) for bromo cresol green solution at 5 and 10ppm using HCl and ammonia for pH adjustment.....       | S14 |
| Figures S12. GCMS analysis data of <i>Inonotus dryadeus</i> (Solvent-ethanol).....                                                                                        | S15 |
| Figures S13. HRMS Details of instruments used for analysis followed by analyzed data...                                                                                   | S44 |
| Figure S14. <sup>1</sup> H NMR of <i>Inonotus dryadeus</i> (Solvent: DMSO).....                                                                                           | S51 |
| Figure S15. <sup>13</sup> C NMR of <i>Inonotus dryadeus</i> (Solvent: DMSO).....                                                                                          | S52 |
| Figure S16. <sup>13</sup> C NMR of <i>Inonotus dryadeus</i> (Solvent: DMSO) expanded.....                                                                                 | S53 |
| Figures S17. The list of most probable molecules from <i>Inonotus dryadeus</i> within the bounds of reasonable and acceptable experimental evidences from this study..... | S54 |

## **1. Experimental Section**

### **1.1. Chemicals and Materials.**

Methylene Blue dye (Merck), Congo Red (HiMedia), Eosin Yellowish (Merck), Bromo Cresol Green (HiMedia), 5% Lambda cyhalothrin pesticide solution of boxer brand (Sun and Ocean Agro India Ltd.) HCl (Merck), NaOH (HiMedia), Ammonia (Merck) used as received.

### **1.2. Isolation of *Inonotus dryadeus* Fungi from Natural Source.**

The orange brownish and spongy fungi grow on stipule of the tree during rainy season, which becoming dark on drying; exuding amber-colored droplets when young, through its pores. Fungi sample was collected from stipule of the *Delonix regia* tree in and around University of Pune campus. It was then squeezed to get an extract and the fungi were observed to change color from yellowish orange to dark brown as soon as extract was taken out. When it was kept in a beaker for 20 minutes, this liquid forms two layers; a black brown substance settled down, while a supernatant and completely transparent lemon colored liquid stays above. The supernatant did not show adsorption/separation of MB. The brown sediment at the bottom of the beaker was harvested and dried in hot air oven for 6 hours at 70°C.

### **1.3. Oils and Pesticide Separation Tests.**

LCP, EO and UEO were used in this study. The adsorption capacity values, W (wt/wt) times were obtained by measuring the mass of the dry *Inonotus dryadeus* (DID) before and after adsorption of oils/pesticide. The samples were left submerged in the layer of pesticide or oils formed over de-ionized and marine water overnight to ensure full saturation and it was obtained before weighing; followed by rapid weighing to avoid evaporation of adsorbed oils or pesticides. Here the test was carried out with marine water, to explore possibility of viable solution for oil spillage in sea and oceans during transport.

#### **1.4. Dye Separation Test.**

Series of experiments were carried out with different concentrations of methylene blue dye and various amounts of DID. It was found out that the optimum quantity to completely decolorize the solution of MB was 5.5 mg for 10 ml of 5 ppm solution. Another solution of 25 ppm and 50 ml volume was added to 5 mg DID to calculate  $Q_e$  value after 24 hours. The DID still decolorized the MB. It should be noted here that fungi extract can be directly used for the same purpose without drying or any other modification. Drying of settled substance in this case was carried out for the purpose of quantification. Decolorization of MB was monitored by UV-visible spectrophotometer (Shimatzu).

## 2. Physical and Chemical Desorption of MB dye

### 2.1. Physical Desorption of MB Dye

It was carried out by adding drops of aqueous MB dye solution in DID powder and pressed through filter paper. Desorption of dye did not occur. Photographic images in Figure S1.

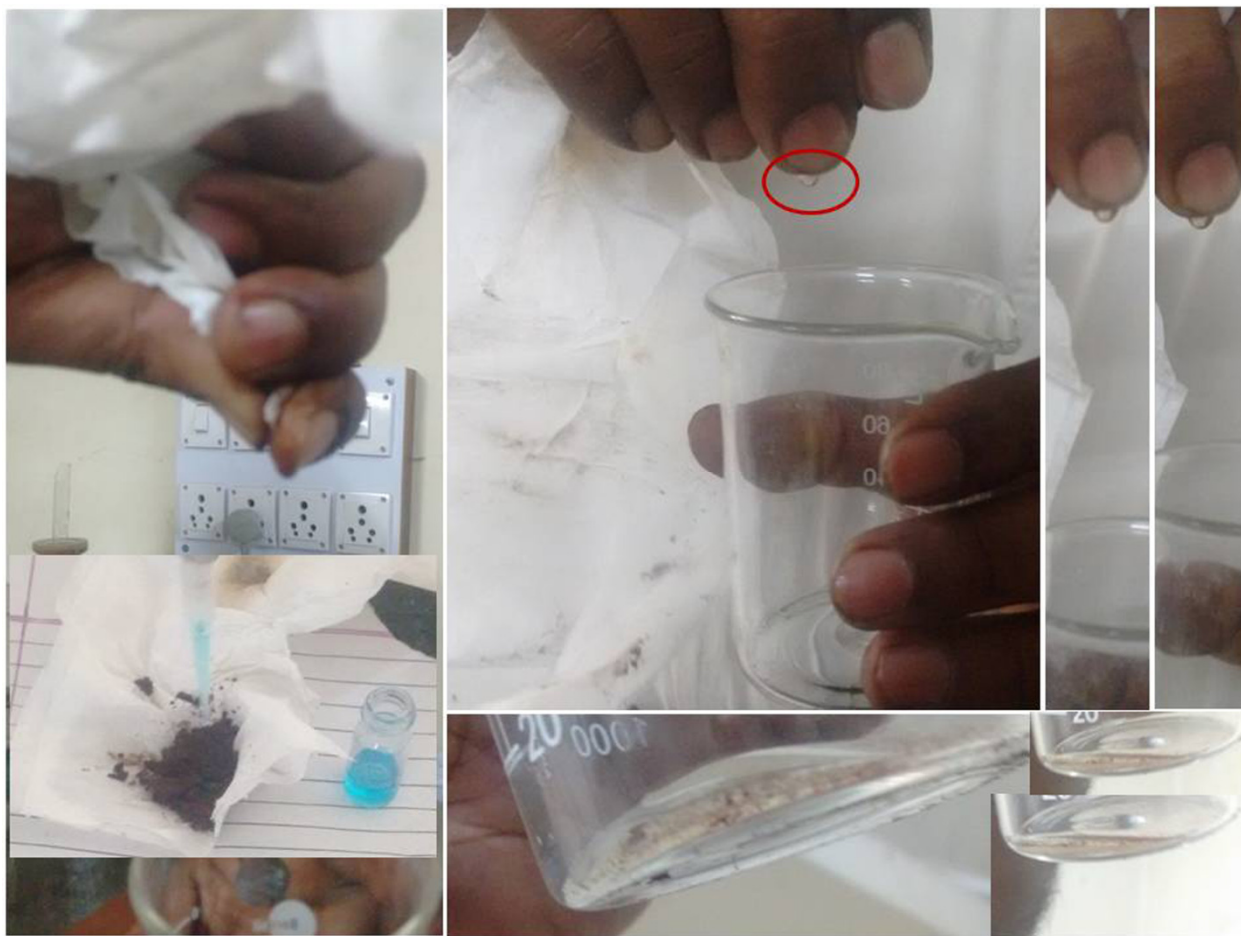

**Figure S1.** Photographic images of physical desorption of MB dye from DID by dropping aqueous MB dye solution on DID powder and followed by pressing through filter paper. Desorption of dye did not occur.

## 2.2. Chemical Desorption Study of Methylene Blue Dye

Chemical desorption of MB using DID was carried out with different solvents and solutions such as acetone (1), benzene (2), chloroform (3), ethyl alcohol (4), ethyl acetate (5), methanol (6), petroleum ether (7), ammonia (8), HCl (9), H<sub>2</sub>SO<sub>4</sub> (10), NaOH (11) and checked at interval of 12 hr (a), 42 hr (b) and 66 hr (c). However desorption did not occur. Photographic images in Figure S2.

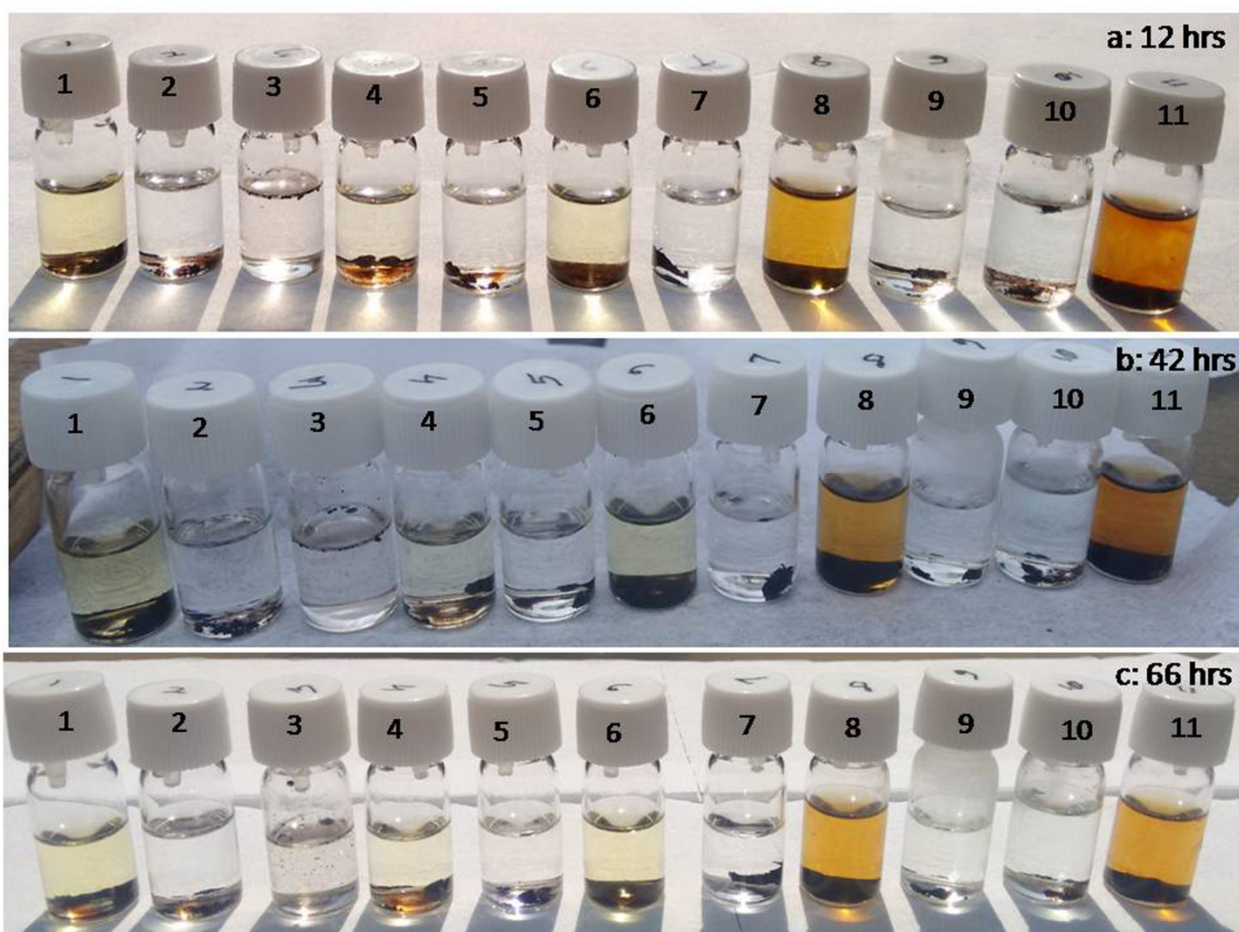

**Figure S2.** Chemical desorption study of methylene blue dye adsorbed on DID was carried out with different solvents and solutions such as acetone (1), benzene (2), chloroform (3), ethyl alcohol (4), ethyl acetate (5), methanol (6), petroleum ether (7), ammonia (8), HCl (9), H<sub>2</sub>SO<sub>4</sub>



(10), NaOH (11) and checked at interval of 12 hr (a), 42 hr (b) and 66 hr (c). However, desorption did not occur.

### 3. DID as a Fuel

Combustion test of engine oil, used engine oil and DID compared in **(Figure S3)**

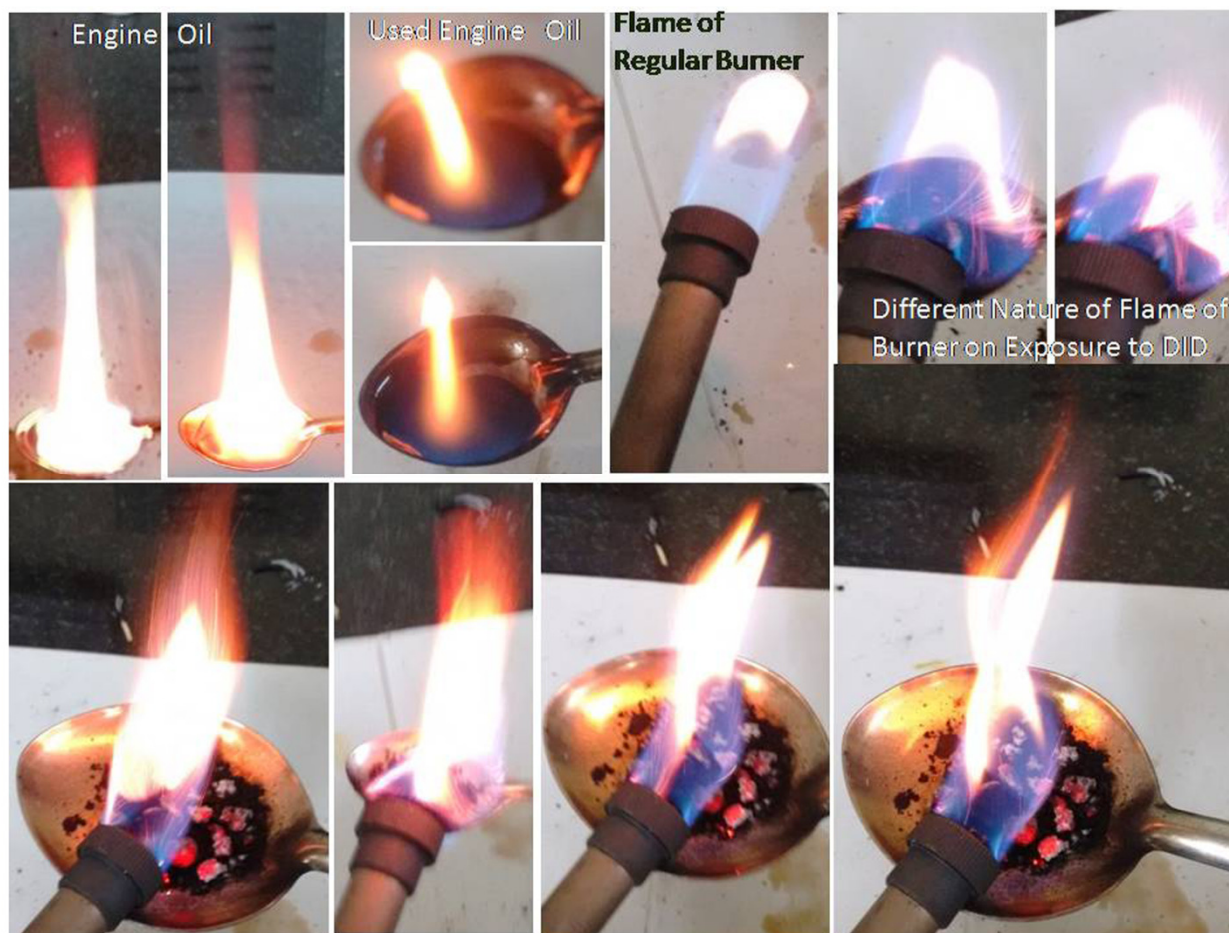

**Figure S3.** Photographic images of burning test of engine oil, used engine oil and DID.

Different photographic images reveal coal like nature of DID as source of fuel (**Figure S4**).

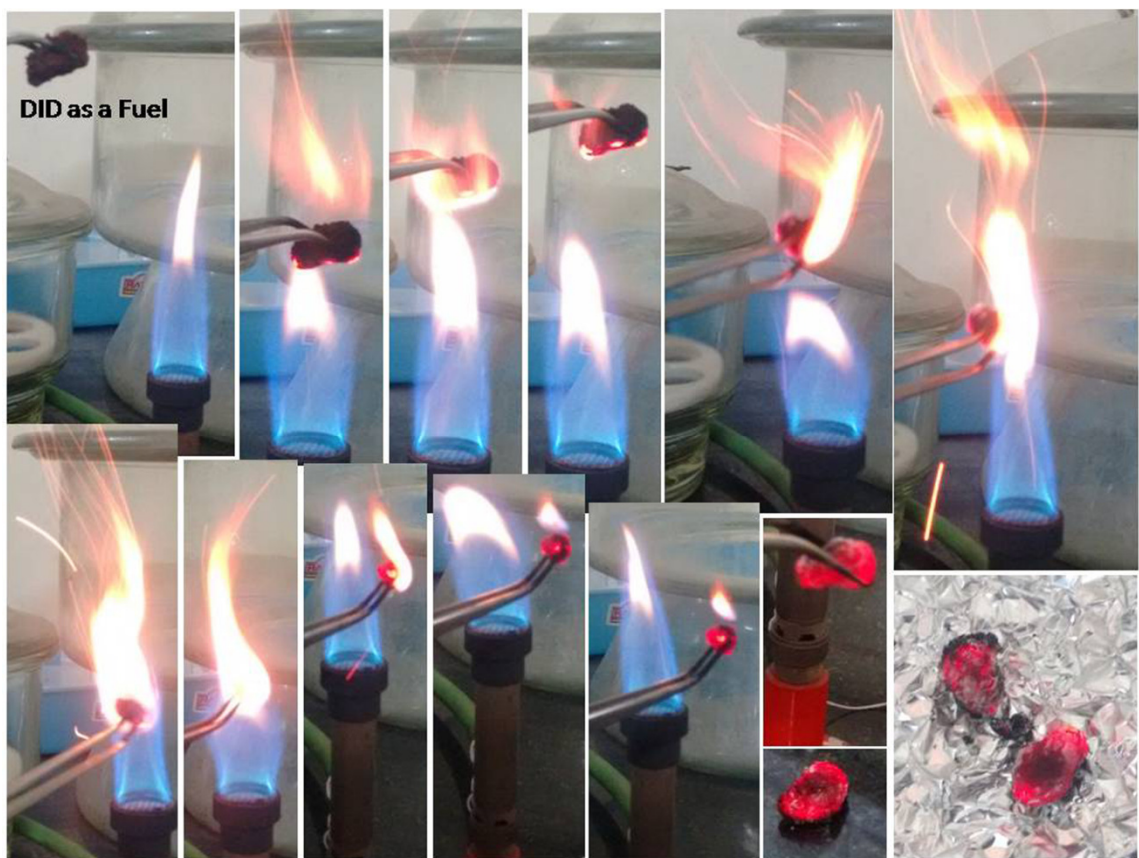

**Figure S4.** Different photographic images reveal coal like nature of DID as the fuel.



#### 4. Reusability Test for Oil Extraction

In this study engine oil was adsorbed with DID followed by extraction by pressing and repeating the cycle (**Figure S5**).

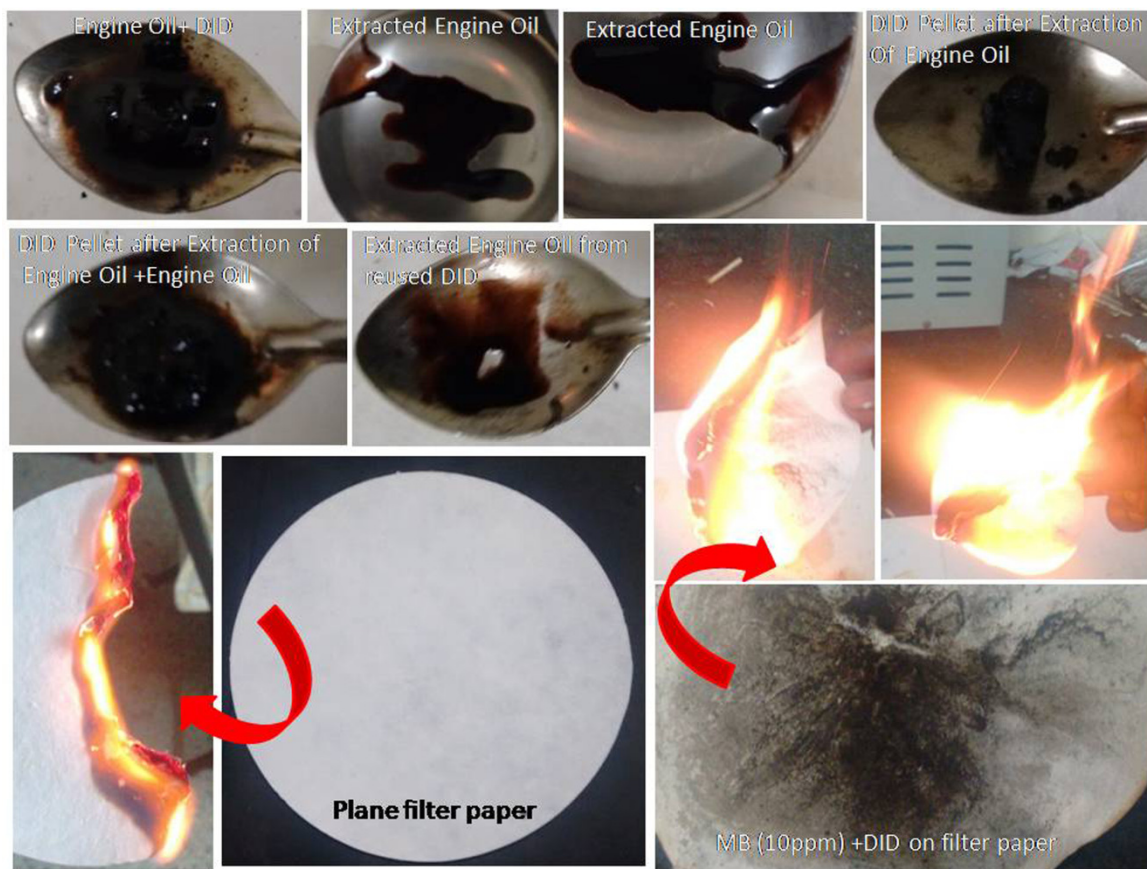

**Figure S5.** In this study engine oil was adsorbed with DID followed by extraction by pressing and repeating the cycle. Combustion test of plane filter paper and MB dye adsorbed precipitate on filter paper was carried out to check its reusability as the source of fuel.

## 5. Quantitative Adsorption of MB Dye

The study on the quantitative adsorption of MB dye in the range of 5-20 ppm using DID was fixed after series of trial experiments using simple UV-visible spectrophotometric technique. Supporting Information (**Figure S6**) displays UV-visible spectra of MB samples (1) using various concentrations of MB dye such as 5 ppm (a), 10 ppm (b), 15 ppm (c), 20 ppm (d); and (2) immediately after addition of 5.5 mg of DID. UV-Visible spectra of 5 to 20 ppm MB clearly indicates that MB from 5 ppm sample quick and completely separated by DID. This can be visibly revealed by inset images of S7, which represents 5 ppm MB solution (curve 1) and decolorized solution immediately after addition of 5.5 mg of DID (curve 2). Brown colored DID turns into bluish black colour after it has decolorized MB solution.

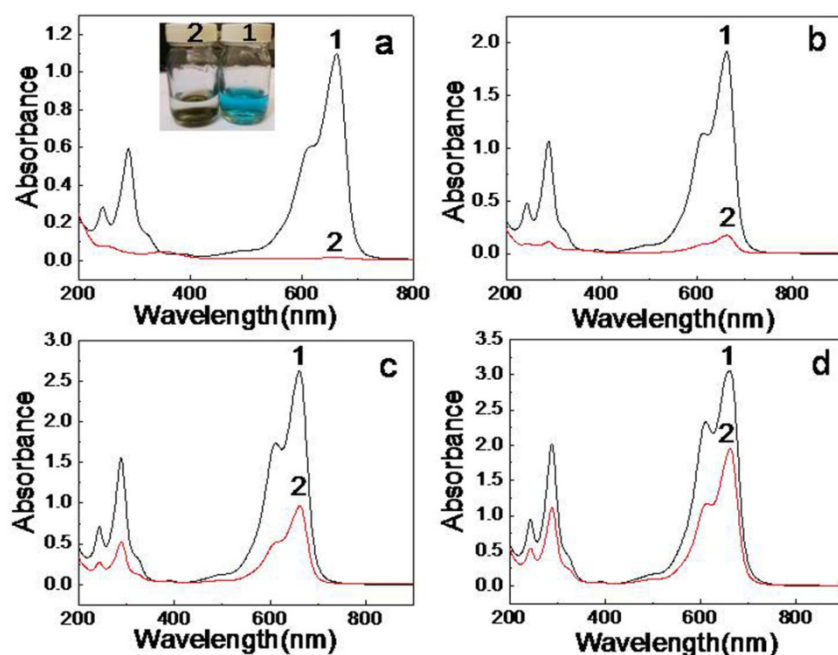

**Figure S6.** UV-Vis spectrum of (1) MB solution of 5 ppm (a), 10 ppm (b), 15 ppm (c), 20 ppm (d) and (2) immediately after addition of 5.5 mg of DID powder; Inset images of Fig. 1a represent 5 ppm MB solution (1) and decolorized solution immediately after addition of 5.5 mg of DID powder (2).

**Table S1. Comparative adsorption investigation and pH effect on removal of dyes**

This study was carried out considering four dyes to understand better efficiency, as summarized in the table appended below. Photographic images and UV-visible data of all the dyes at two different concentrations (5ppm and 10ppm) and at various pH values (2, 4, 6, 7, 8, 10, 12) are added in supporting information (**Figure S7 – S11**).

| Sr. No. | Name of Dye | Concentration of Dye | pH Adjusted By  | pH/pH Range of Complete Adsorption of Dye |
|---------|-------------|----------------------|-----------------|-------------------------------------------|
| 1       | MB          | 5ppm and 10ppm       | HCl and NaOH    | 6-12                                      |
| 2       | MB          | 5ppm and 10ppm       | HCl and Ammonia | 6-12                                      |
| 3       | CR          | 5ppm and 10ppm       | HCl and Ammonia | 2                                         |
| 4       | EY          | 5ppm and 10ppm       | HCl and Ammonia | 2                                         |
| 5       | BCG         | 5ppm and 10ppm       | HCl and Ammonia | 2                                         |

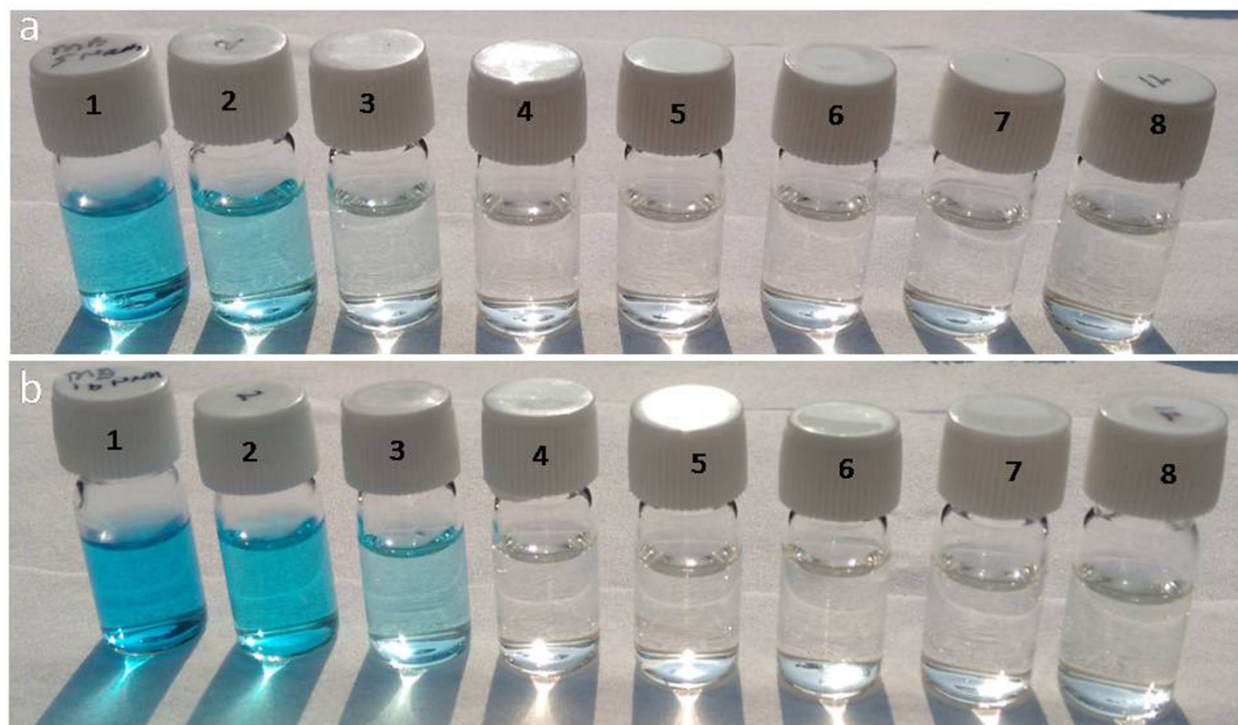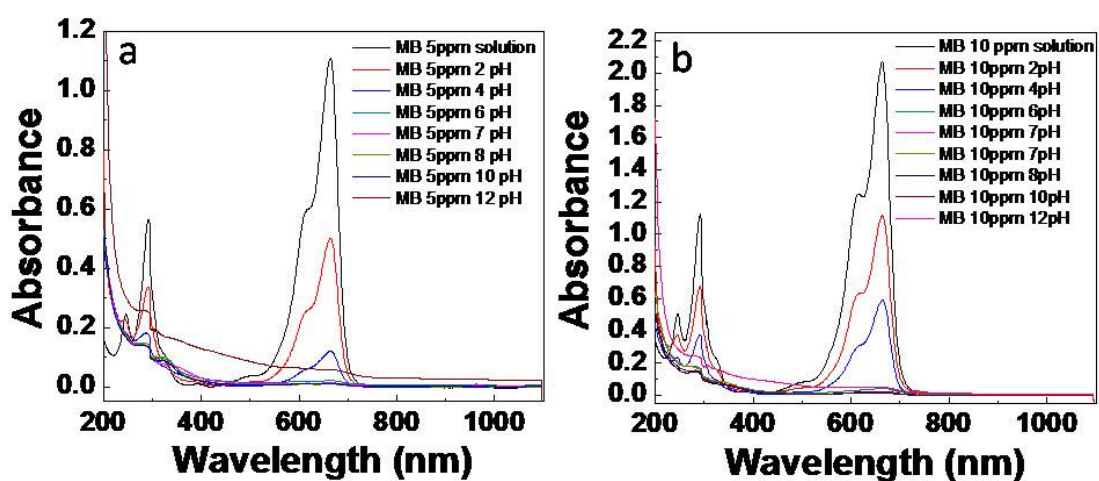

**Figure S7.** Photographic images of methylene blue (MB) solution at two concentrations 5ppm (a) and 10ppm (1) and after adjusting pH by HCl and NaOH followed by reaction with DID at various pH values pH 2 (2), pH 4 (3), pH 6 (4), pH 7 (5), pH 8 (6), pH 10 (7) and pH 12 (8). Corresponding UV-visible spectra a and b for 5 and 10 ppm respectively.



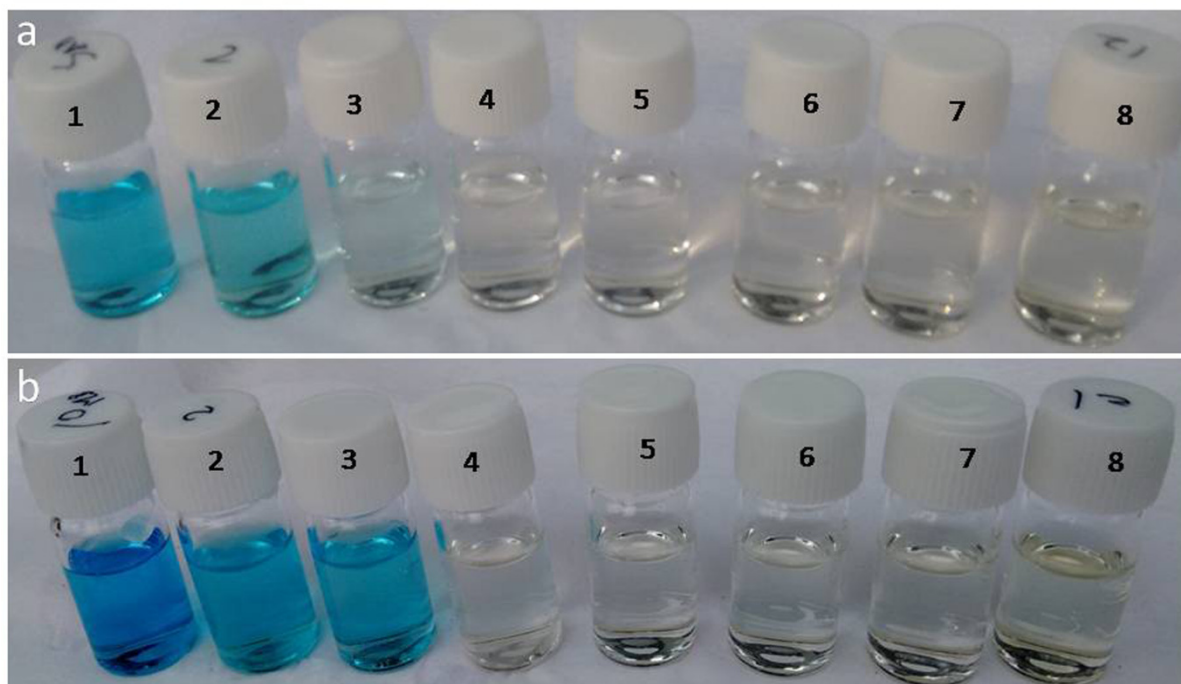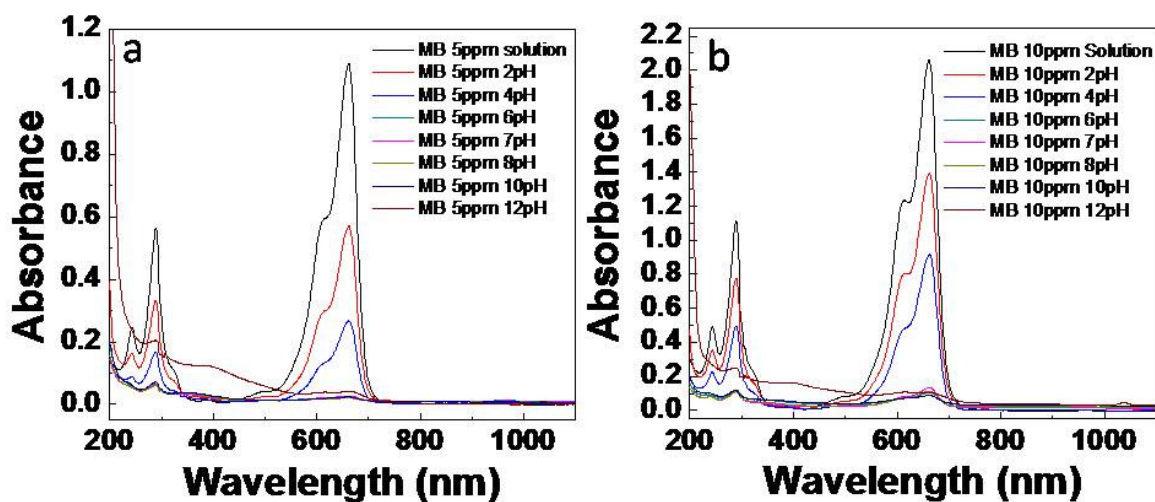

**Figure S8.** Photographic images of MB solution at two concentrations 5ppm (a) and 10ppm (1) and after adjusting pH by HCl and ammonia followed by reaction with DID at various pH values; pH 2 (2), pH 4 (3), pH 6 (4), pH 7 (5), pH 8 (6), pH 10 (7) and pH 12 (8). Corresponding UV-visible spectra a and b for 5 and 10 ppm respectively.

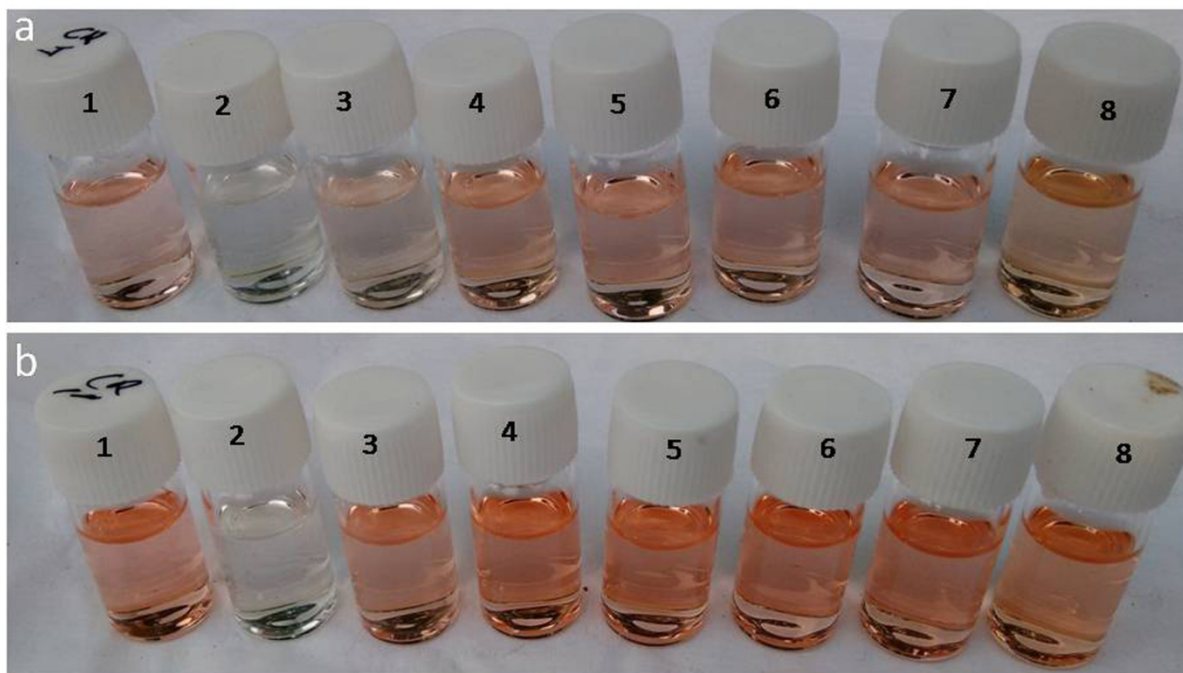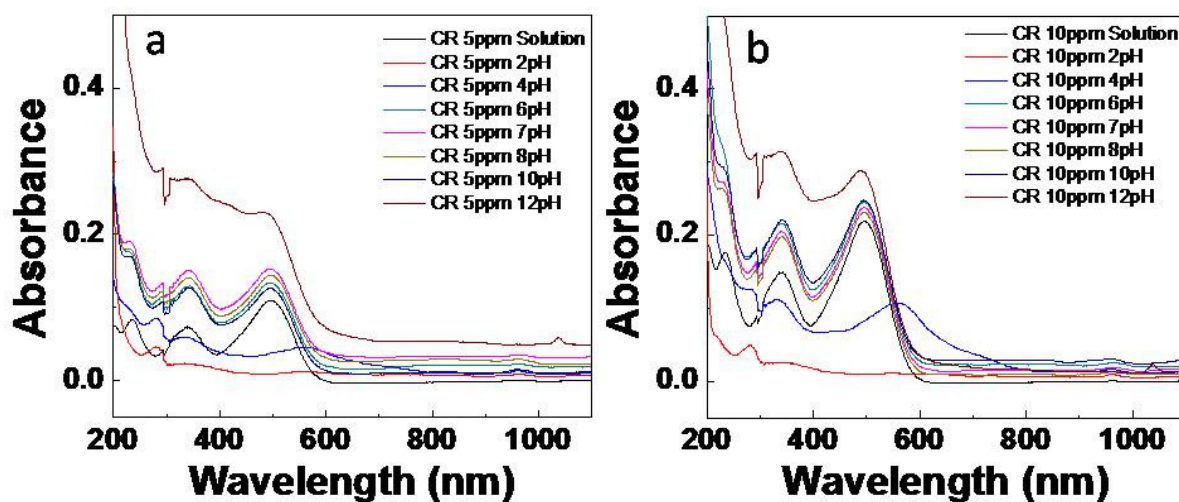

**Figure S9.** Photographic images of Congo Red (CR) solution at two concentrations 5ppm (a) and 10ppm (1) and after adjusting pH by HCl and ammonia followed by reaction with DID at various pH values; pH 2 (2), pH 4 (3), pH 6 (4), pH 7 (5), pH 8 (6), pH 10 (7) and pH 12 (8). Corresponding UV-visible spectra a and b for 5 and 10 ppm respectively.



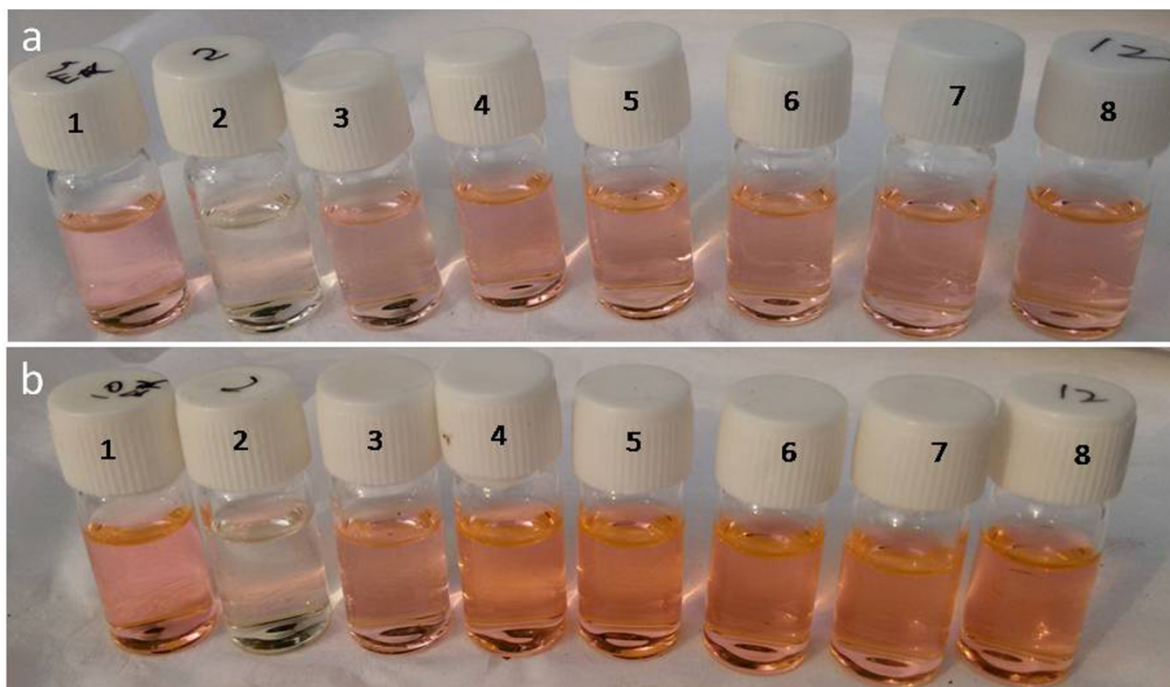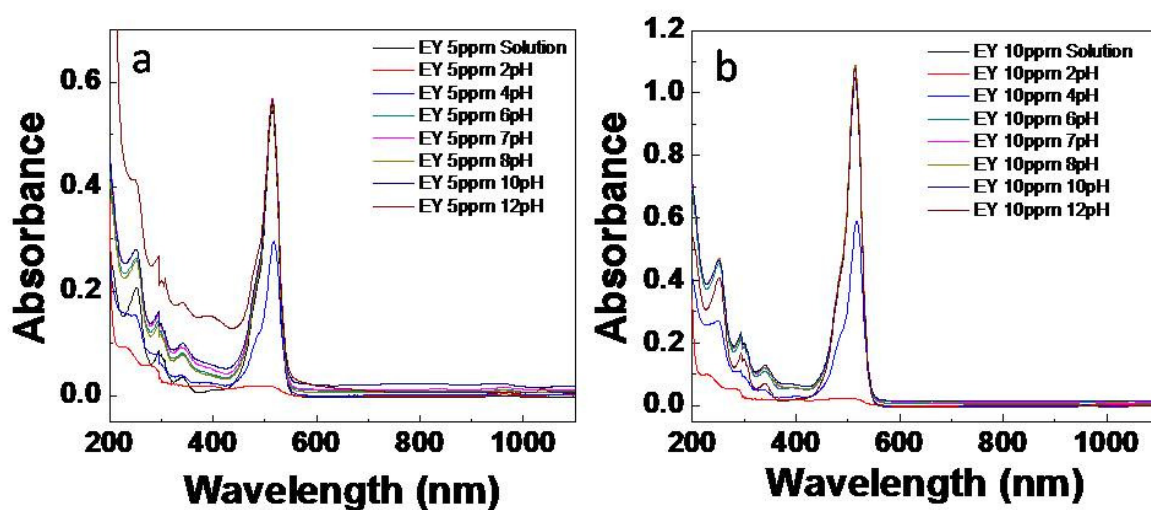

**Figure S10.** Photographic images of Eosin Yellowish (EY) solution at two concentrations 5ppm (a) and 10ppm (1) and after adjusting pH by HCl and ammonia followed by reaction with DID at various pH values; pH 2 (2), pH 4 (3), pH 6 (4), pH 7 (5), pH 8 (6), pH 10 (7) and pH 12 (8). Corresponding UV-visible spectra a and b for 5 and 10 ppm respectively.

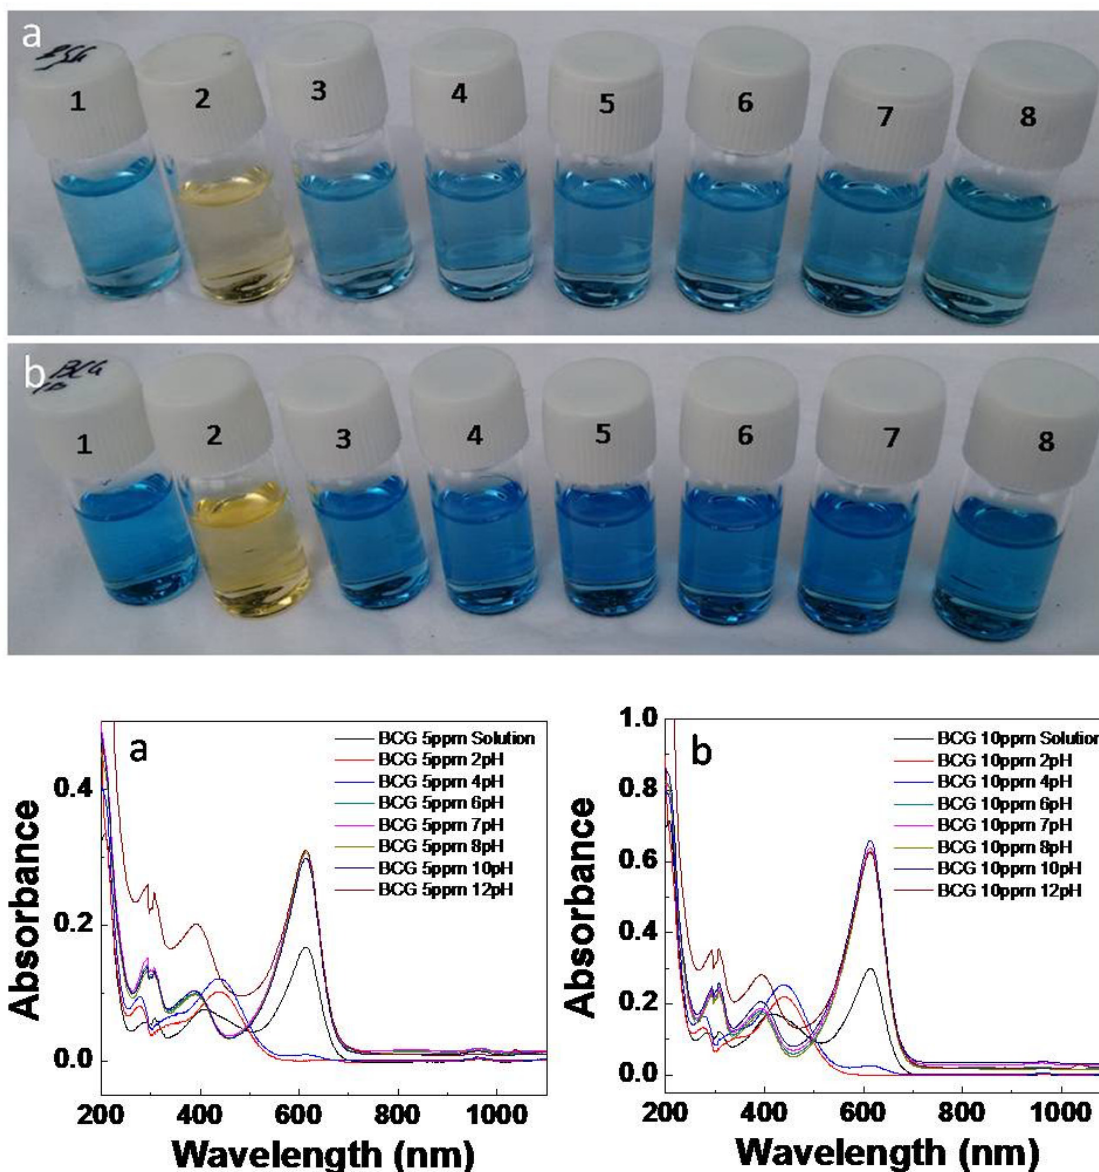

**Figure S11.** Photographic images of Bromo Cresol Green (BCG) solution at two concentrations 5ppm (a) and 10ppm (1) and after adjusting pH by HCl and ammonia followed by reaction with DID at various pH values; pH 2 (2), pH 4 (3), pH 6 (4), pH 7 (5), pH 8 (6), pH 10 (7) and pH 12 (8). Corresponding UV-visible spectra a and b for 5 and 10 ppm respectively.

**Figures S12.** GCMS analysis data of *Inonotus dryadeus* (Solvent-Methanol)

Instrument used for analysis: Shimatzu, GC 2010 Plus

Column Oven Temperature 80°C

Injection Temperature 260°C

Injection Mode: Split

Carrier Gas: Helium Prim. Press. 500-900

Flow Control Mode: Linear Velocity

Pressure: 80.4 kPa

Total Flow: 33.9 ml/min

Column Flow: 1.19 ml/min

Linear Velocity: 40.2 cm/sec

Purge Flow: 30 ml/min

Column Oven Temperature

|   | Rate | Final Temperature | Hold Time |
|---|------|-------------------|-----------|
| 0 | -    | 80.0              | 0.00      |
| 1 | 15.0 | 240.0             | 4.00      |
| 2 | 10.0 | 290.0             | 8.00      |
| 3 | 0.00 | 0.00              | 0.00      |

Total Programme Time: 27.67 min.

Column

Name: Rtx 5MS

Thickness: 0.25µm

Length: 30.0 m

Diameter: 0.25µm

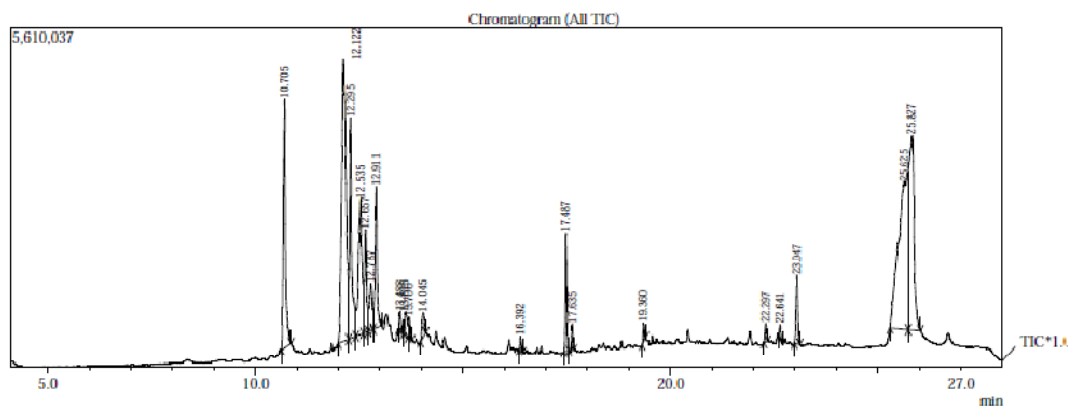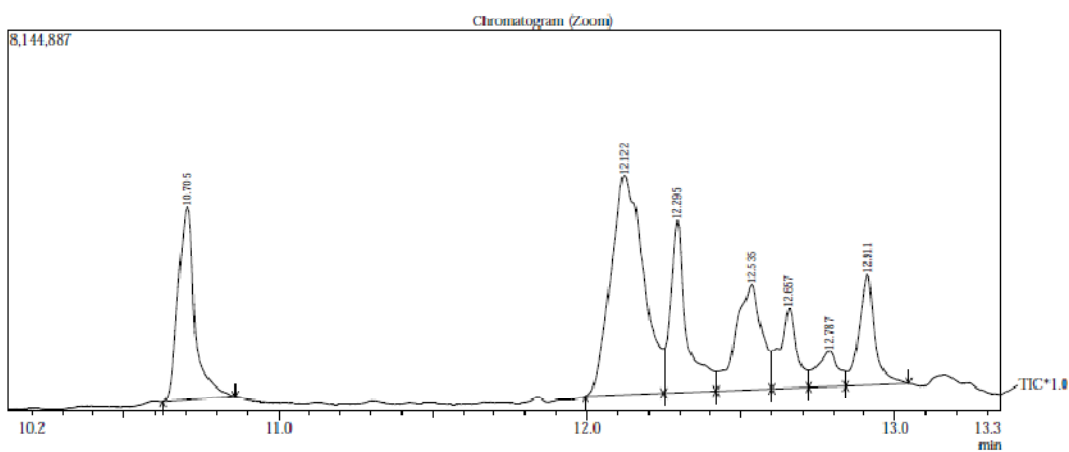

Spectrum

Line#1 R.Time:10.710(Scan#:1323)  
 MassPeaks:781  
 RawMode:Single 10.710(1323) BasePeak:73.00(364242)  
 BC Mode:None Group 1 - Event 1 Scan

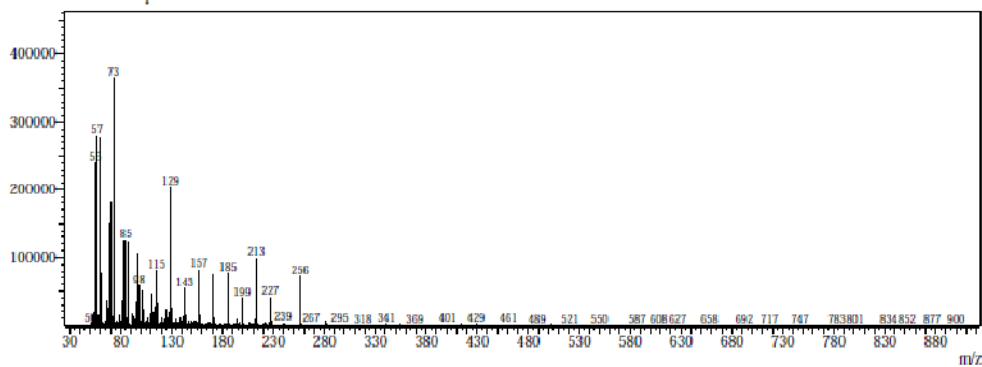

# Library Search

<< Target >>

Line#:1 R.Time:10.710(Scan#:1323) MassPeaks:781

RawMode:Single 10.710(1323) BasePeak:73.00(10000)

BG Mode:None Group 1 - Event 1 Scan

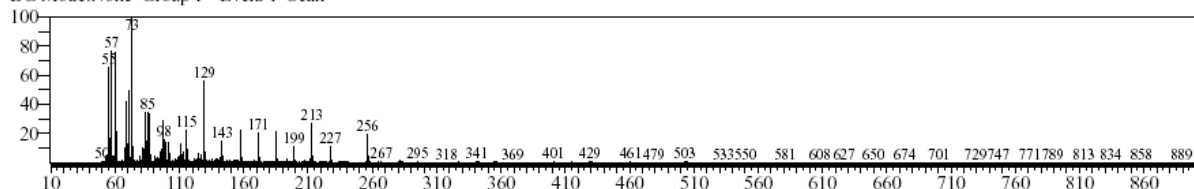

Hit#:1 Entry:211367 Library:NIST11.lib

SI:92 Formula:C38H68O8 CAS:28474-90-0 MolWeight:652 RetIndex:4765

CompName:1-(+)-Ascorbic acid 2,6-dihexadecanoate

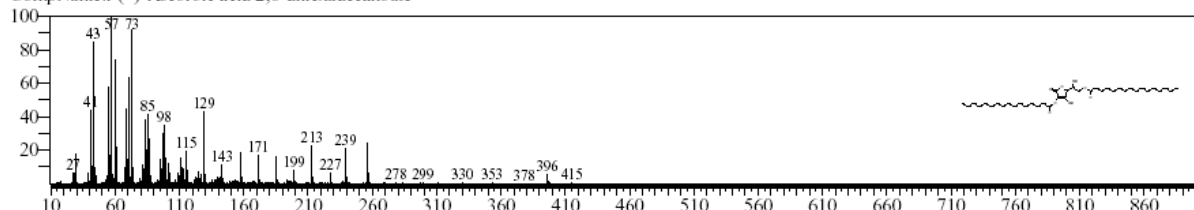

Hit#:2 Entry:23313 Library:NIST11s.lib

SI:92 Formula:C16H32O2 CAS:57-10-3 MolWeight:256 RetIndex:1968

CompName:n-Hexadecanoic acid \$\$ Hexadecanoic acid \$\$ n-Hexadecanoic acid \$\$ Palmitic acid \$\$ Pentadecanecarboxylic acid \$\$ 1-Pentadecanecarboxylic

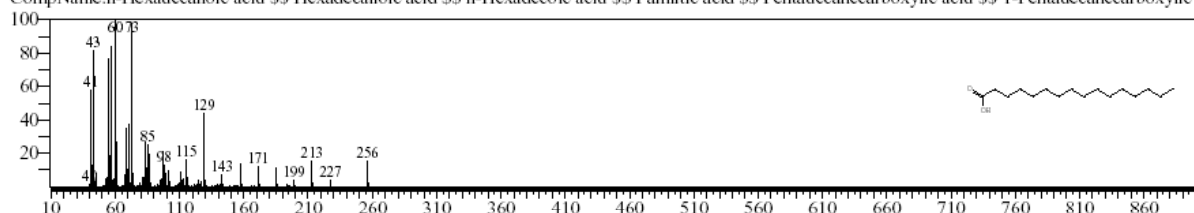

Hit#:3 Entry:22188 Library:NIST11s.lib

SI:91 Formula:C15H30O2 CAS:1002-84-2 MolWeight:242 RetIndex:1869

CompName:Pentadecanoic acid \$\$ Pentadecylic acid \$\$ n-Pentadecanoic acid \$\$ n-Pentadecylic acid \$\$

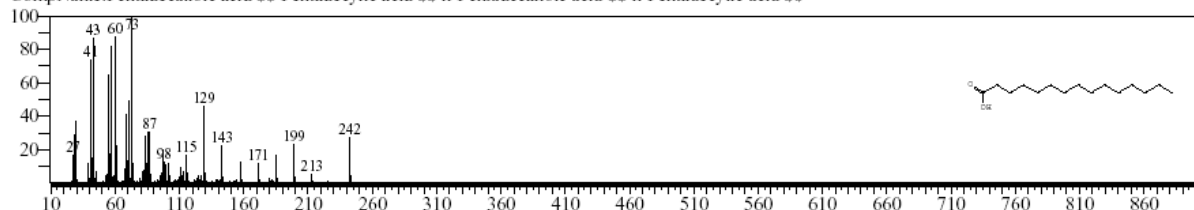

Hit#:4 Entry:23305 Library:NIST11s.lib

SI:90 Formula:C16H32O2 CAS:57-10-3 MolWeight:256 RetIndex:1968

CompName:n-Hexadecanoic acid \$\$ Hexadecanoic acid \$\$ n-Hexadecanoic acid \$\$ Palmitic acid \$\$ Pentadecanecarboxylic acid \$\$ 1-Pentadecanecarboxylic

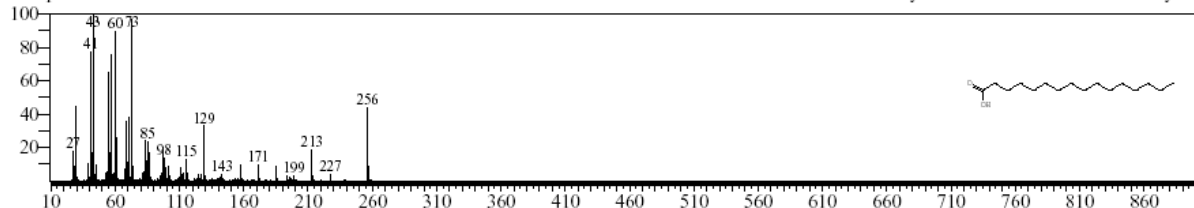

Hit#:5 Entry:26800 Library:NIST11s.lib

SI:90 Formula:C20H40O2 CAS:506-30-9 MolWeight:312 RetIndex:2366

CompName:Eicosanoic acid \$\$ Arachic acid \$\$ Arachidic acid \$\$ Icosenoic acid \$\$ n-Eicosanoic acid \$\$ Arachidic acid (synthetic) \$\$

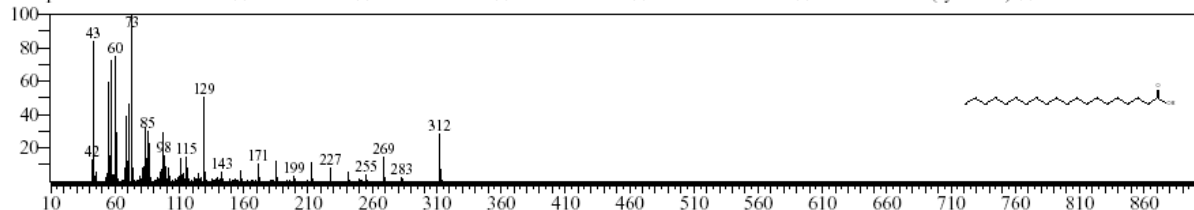

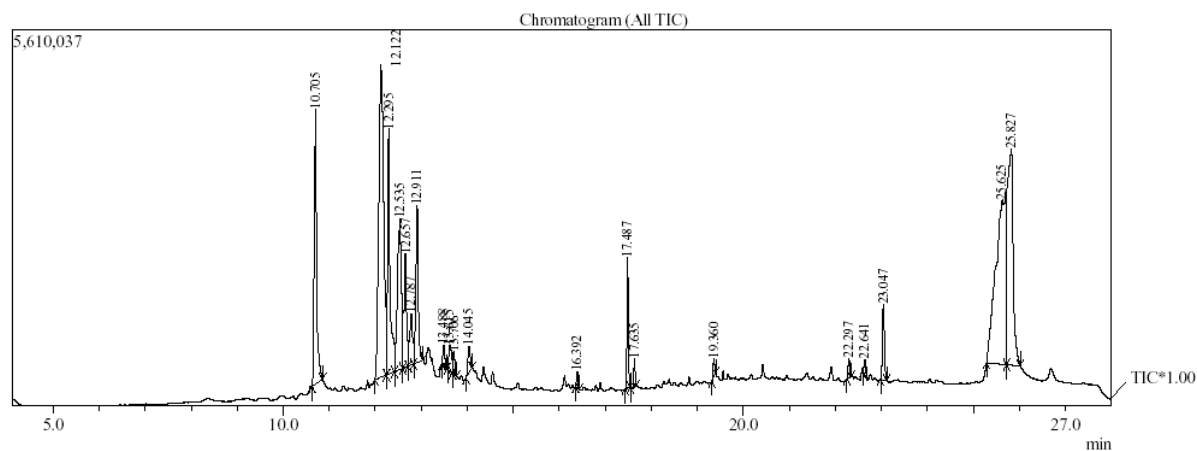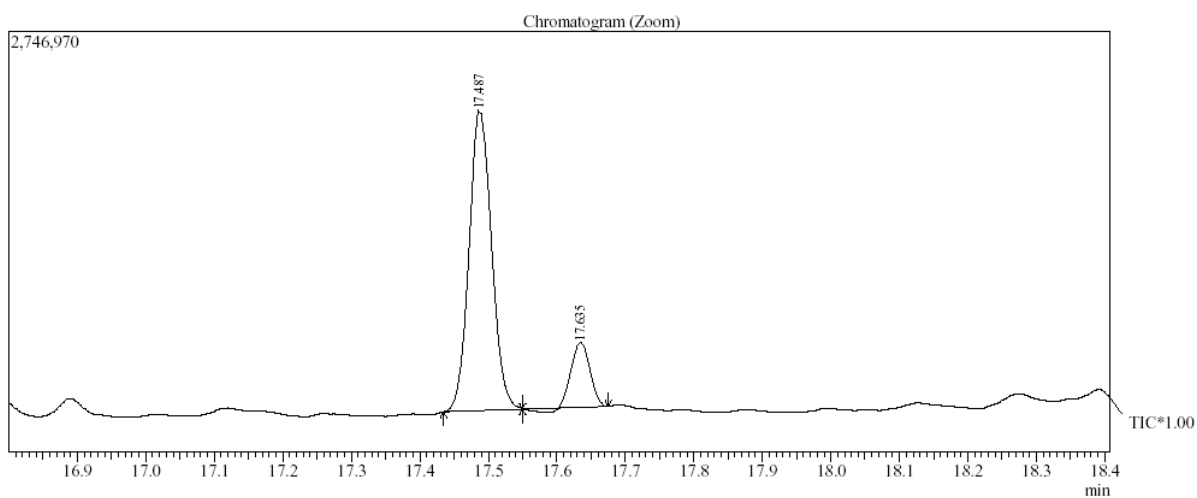

Spectrum

Line#:1 R.Time:17.485(Scan#:2678)  
 MassPeaks:818  
 RawMode:Single 17.485(2678) BasePeak:219.05(155713)  
 BG Mode:None Group 1 - Event 1 Scan

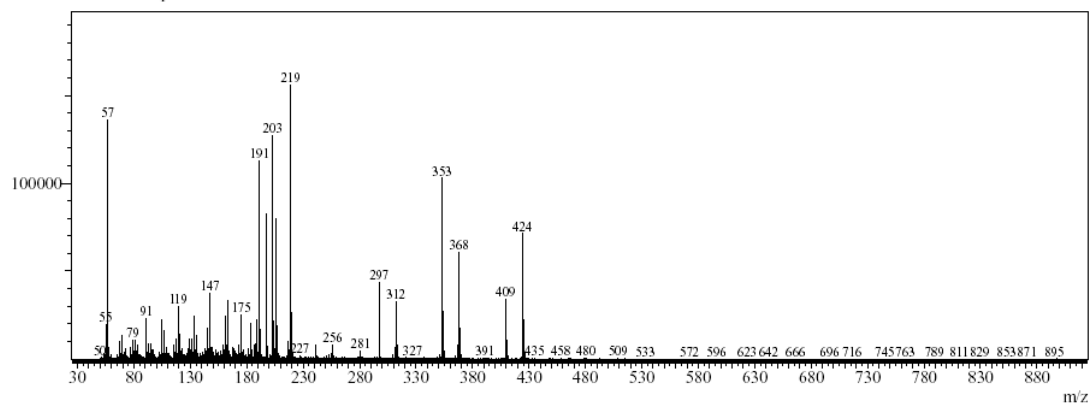



## Library Search

&lt;&lt; Target &gt;&gt;

Line#:1 R.Time:17.485(Scan#:2678) MassPeaks:818

RawMode:Single 17.485(2678) BasePeak:219.05(10000)

BG Mode:None Group 1 - Event 1 Scan

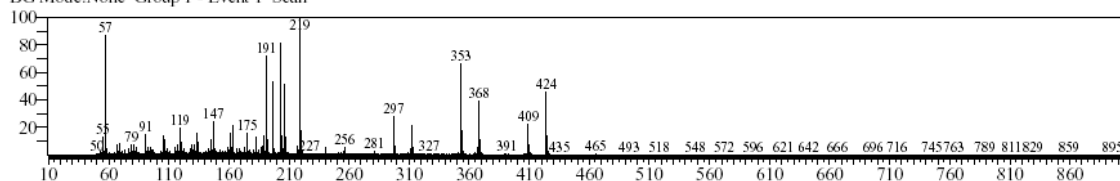

Hit#:1 Entry:30051 Library:NIST11s.lib

SI:55 Formula:C<sub>29</sub>H<sub>44</sub>O<sub>2</sub> CAS:118-82-1 MolWeight:424 RetIndex:3215

CompName:Phenol, 4,4'-methylenebis[2,6-bis(1,1-dimethylethyl)-] SS Phenol, 4,4'-methylenebis[2,6-di-tert-butyl-] SS Antioxidant E 702 SS Bimox M SS Bim

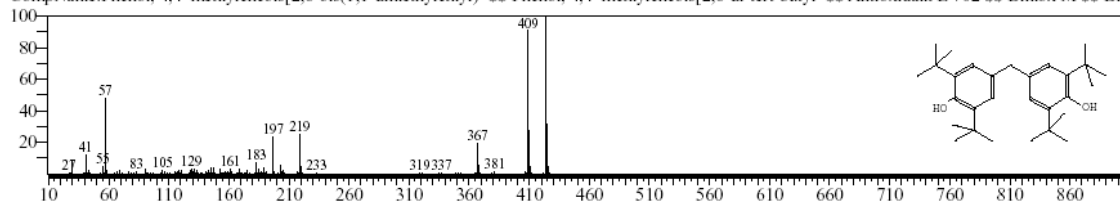

Hit#:2 Entry:195285 Library:NIST11s.lib

SI:54 Formula:C<sub>30</sub>H<sub>50</sub>O<sub>2</sub> CAS:56614-56-3 MolWeight:442 RetIndex:3046

CompName:D:A-Friedooleanan-7-one, 3-hydroxy- SS 3-Hydroxy-4,4a,6b,8a,11,11,12b,14a-octamethylcosahydro-6(2H)-picenone # SS

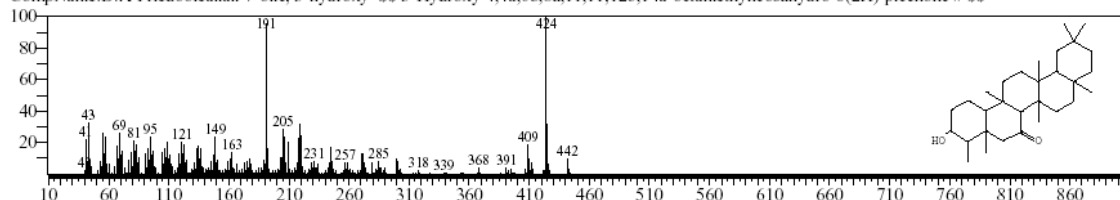

Hit#:3 Entry:30052 Library:NIST11s.lib

SI:51 Formula:C<sub>29</sub>H<sub>44</sub>O<sub>2</sub> CAS:118-82-1 MolWeight:424 RetIndex:3215

CompName:Phenol, 4,4'-methylenebis[2,6-bis(1,1-dimethylethyl)-] SS Phenol, 4,4'-methylenebis[2,6-di-tert-butyl-] SS Antioxidant E 702 SS Bimox M SS Bim

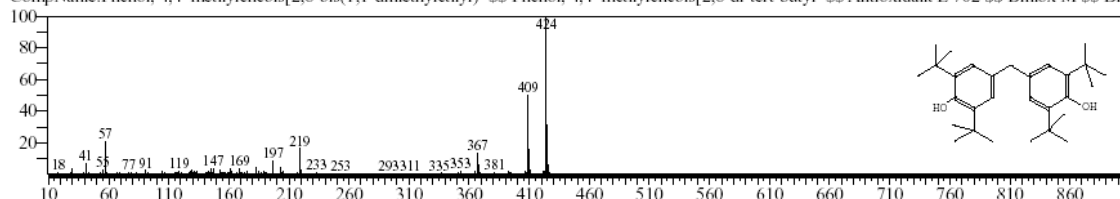

Hit#:4 Entry:99825 Library:NIST11s.lib

SI:51 Formula:C<sub>17</sub>H<sub>24</sub>O<sub>3</sub> CAS:82304-66-3 MolWeight:276 RetIndex:2081

CompName:7,9-Di-tert-butyl-1-oxaspiro[4.5]deca-6,9-diene-2,8-dione SS 1-Oxa-spiro[4.5]deca-6,9-diene-2,8-dione, 7,9-di-tert-butyl- SS 7,9-Di-tert-butyl-1

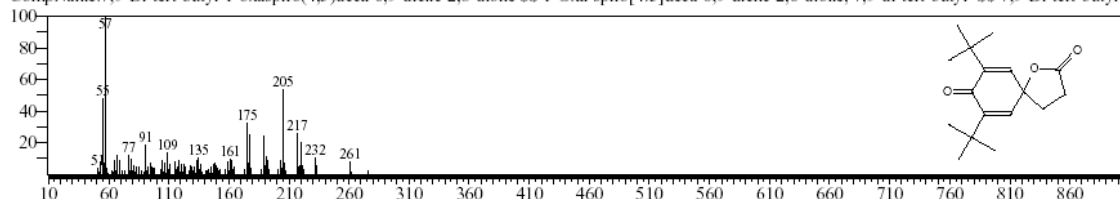

Hit#:5 Entry:190448 Library:NIST11s.lib

SI:50 Formula:C<sub>30</sub>H<sub>48</sub>O CAS:13250-38-9 MolWeight:424 RetIndex:2873

CompName:Urs-12-en-28-al

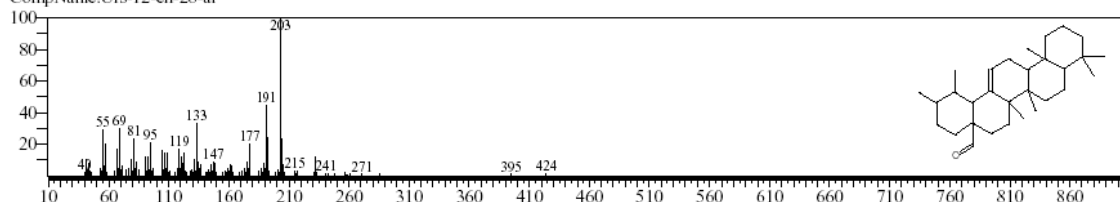

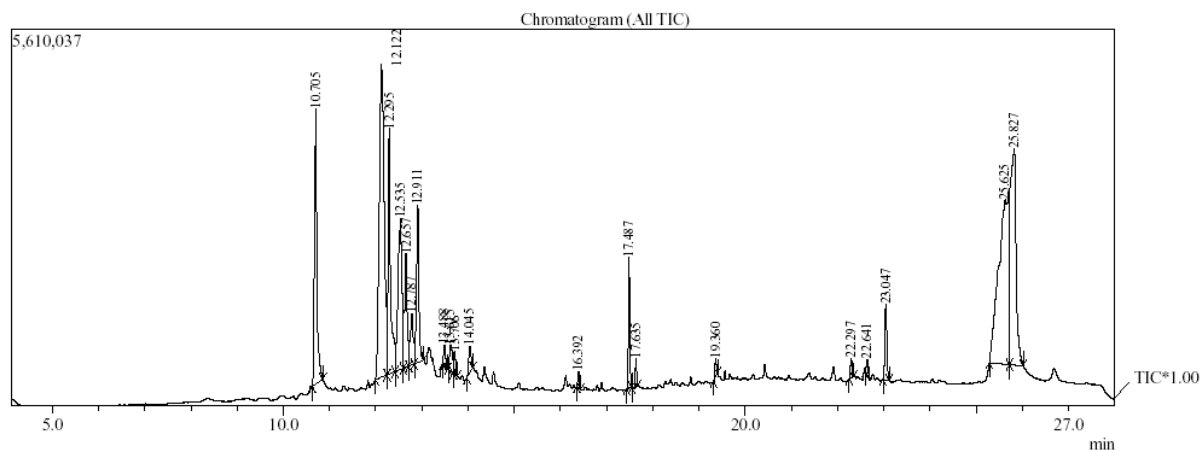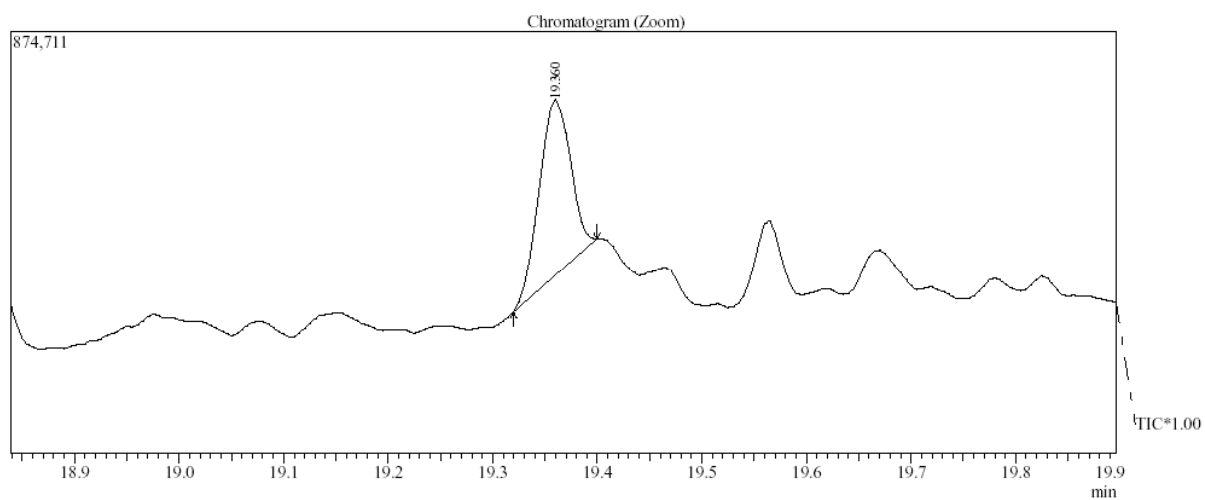

Spectrum

Line#:1 R.Time:19.365(Scan#:3054)  
 MassPeaks:807  
 RawMode:Single 19.365(3054) BasePeak:149.00(27964)  
 BG Mode:None Group 1 - Event 1 Scan

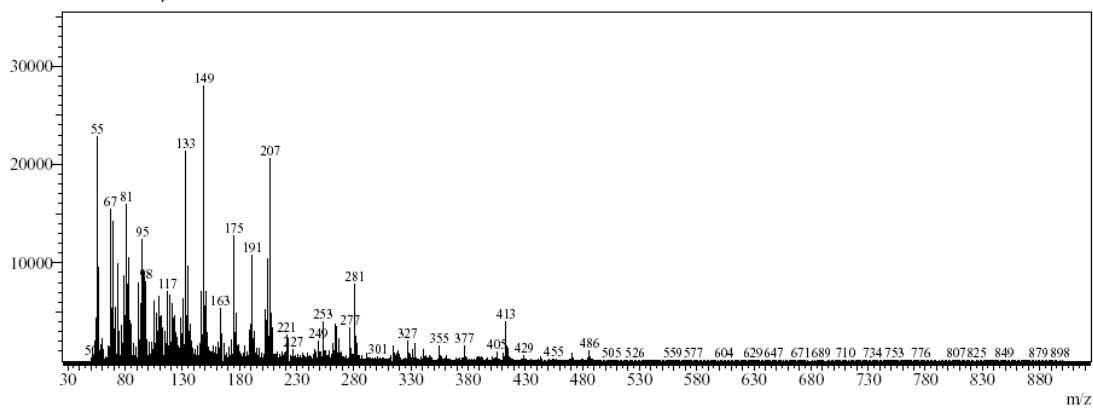

## Library Search

&lt;&lt; Target &gt;&gt;

Line#:1 R.Time:19.365(Scan#:3054) MassPeaks:807

RawMode:Single 19.365(3054) BasePeak:149.00(10000)

BG Mode:None Group 1 - Event 1 Scan

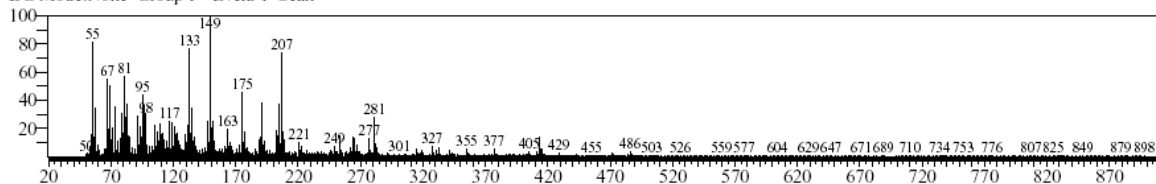

Hit#:1 Entry:197367 Library:NIST11.lib

SI:69 Formula:C33H56 CAS:0-00-0 MolWeight:452 RetIndex:2885

CompName:1,1,6-trimethyl-3-methylene-2-(3,6,9,13-tetramethyl-6-ethenyl-10,14-dimethylene-pentadec-4-enyl)cyclohexane

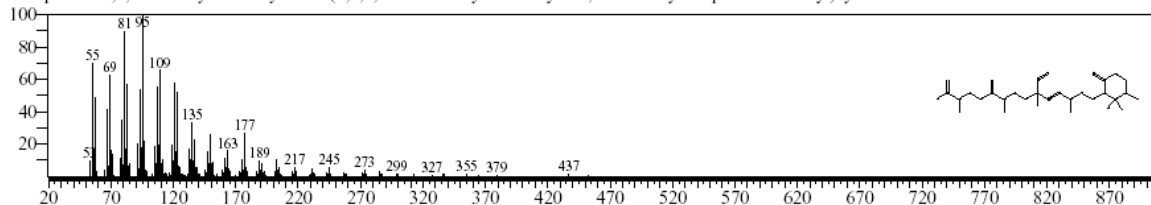

Hit#:2 Entry:195680 Library:NIST11.lib

SI:69 Formula:C30H52O2 CAS:0-00-0 MolWeight:444 RetIndex:3350

CompName:Tricyclo[20.8.0.0(7,16)]triacontane, 1(22),7(16)-diepoxy-

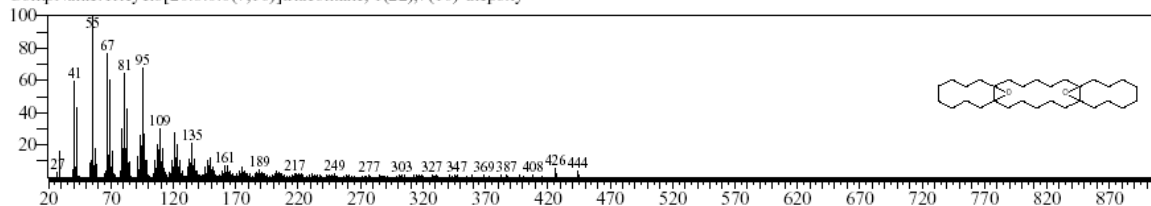

Hit#:3 Entry:191097 Library:NIST11.lib

SI:69 Formula:C30H50O CAS:545-47-1 MolWeight:426 RetIndex:2848

CompName:Lupcol \$\$ Lup-20(29)-en-3-ol, (3.beta.)- \$\$ Lup-20(29)-en-3.beta.-ol \$\$ .beta.-Viscol \$\$ Clerodol \$\$ Fagarasterol \$\$ Fagarsterol \$\$ Lupenol \$

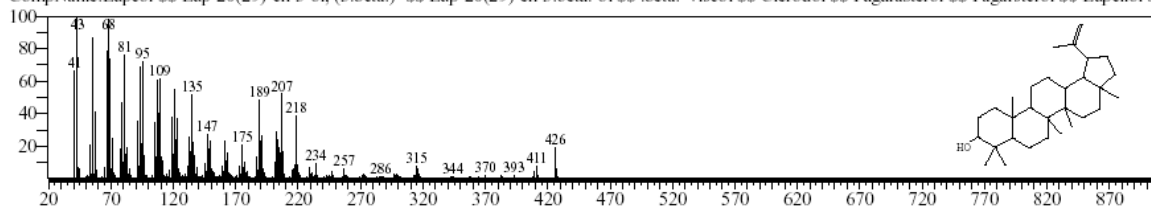

Hit#:4 Entry:207593 Library:NIST11.lib

SI:68 Formula:C37H76O CAS:105794-58-9 MolWeight:536 RetIndex:3942

CompName:1-Heptatriacontanol \$\$ 1-Heptatriacontanol # \$\$

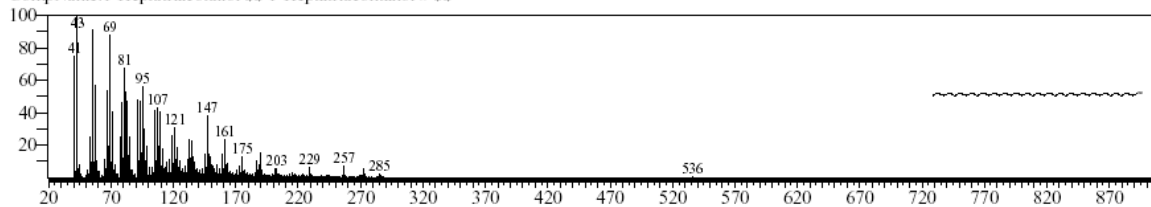

Hit#:5 Entry:190447 Library:NIST11.lib

SI:68 Formula:C30H48O CAS:10070-76-5 MolWeight:424 RetIndex:2886

CompName:Olean-12-en-28-al

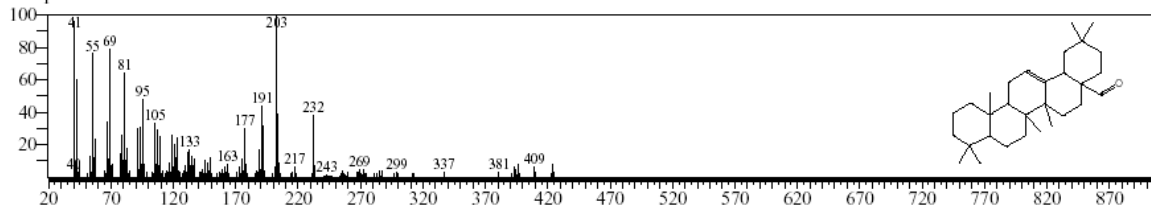

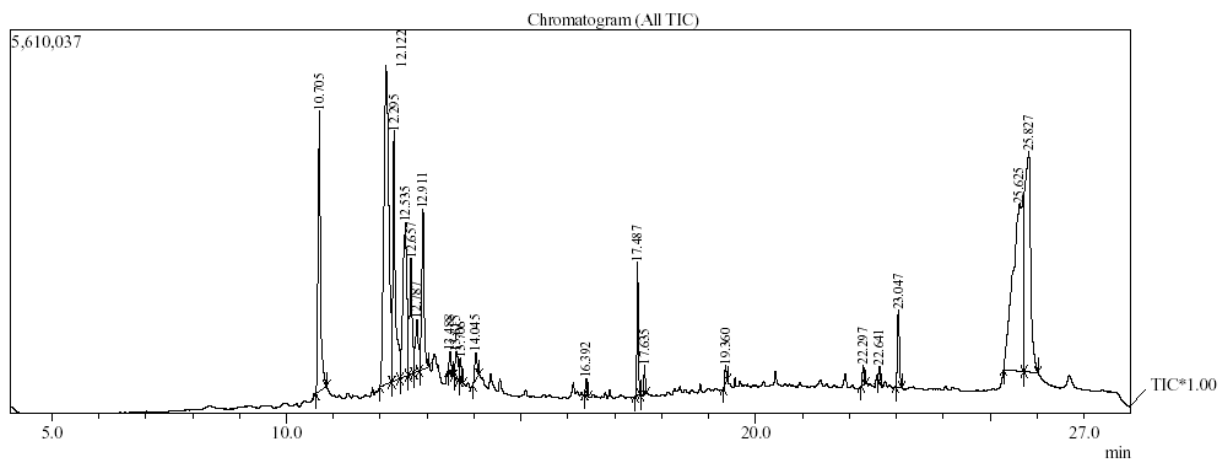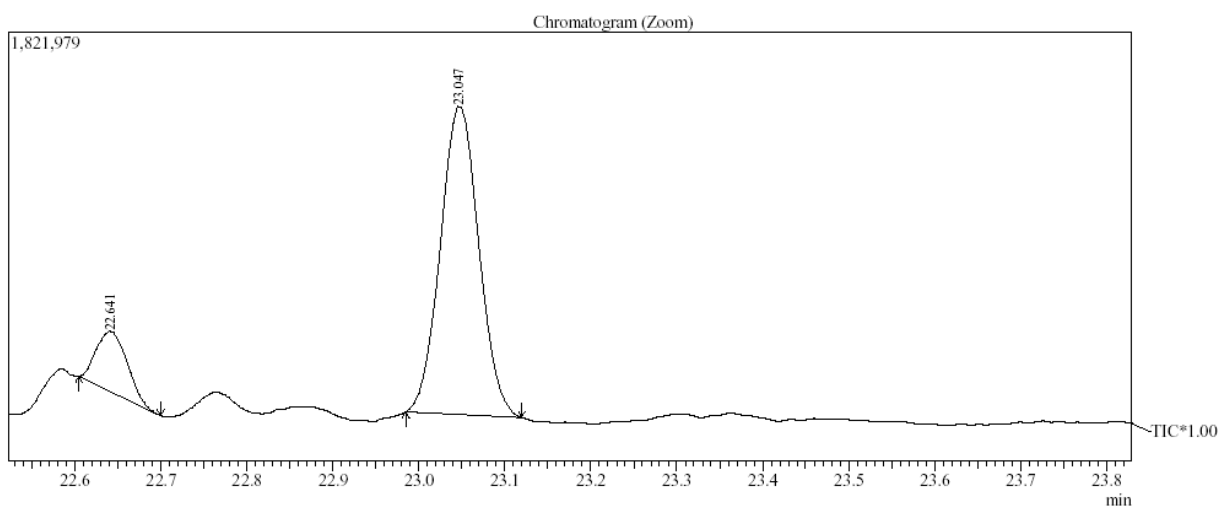

Spectrum

Line#:1 R.Time:23.050(Scan#:3791)  
 MassPeaks:822  
 RawMode:Single 23.050(3791) BasePeak:147.05(60015)  
 BG Mode:None Group 1 - Event 1 Scan

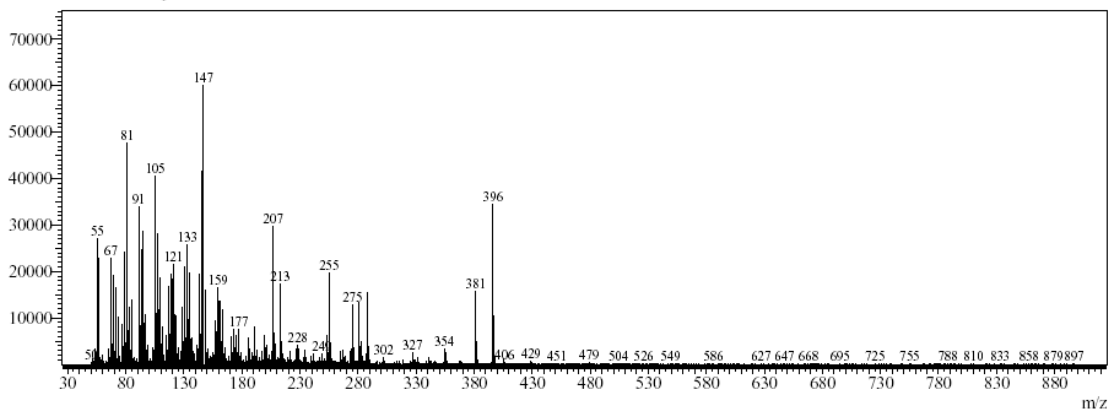

## Library Search

&lt;&lt; Target &gt;&gt;

Line#:1 R.Time:23.050(Scan#:3791) MassPeaks:822

RawMode:Single 23.050(3791) BasePeak:147.05(10000)

BG Mode:None Group 1 - Event 1 Scan

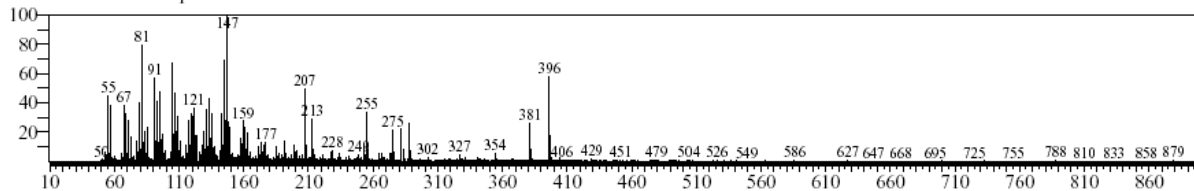

Hit#:1 Entry:30335 Library:NIST11s.lib

SI:83 Formula:C31H52O2 CAS:915-05-9 MolWeight:456 RetIndex:2871

CompName:.beta.-Sitosterol acetate \$\$ Stigmast-5-en-3-ol, acetate, (3.beta.)- \$\$ .beta.-Sitosterol 3-acetate \$\$ .beta.-Sitoseryl acetate \$\$ Acetyl-.beta.-sitoste

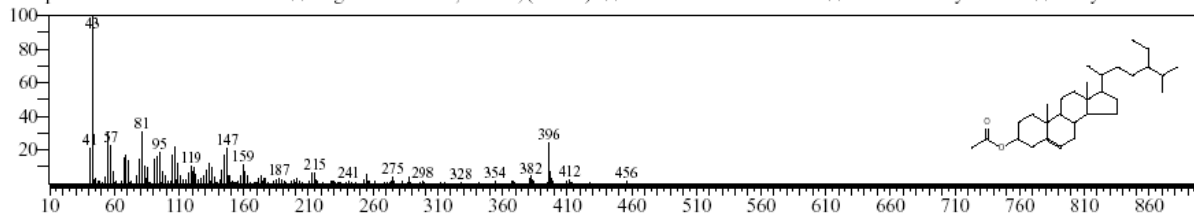

Hit#:2 Entry:211748 Library:NIST11s.lib

SI:82 Formula:C47H82O2 CAS:0-00-0 MolWeight:678 RetIndex:4469

CompName:Stigmast-5-en-3-ol, oleate \$\$ Stigmast-5-en-3-yl (9Z)-9-octadecenoate # \$\$

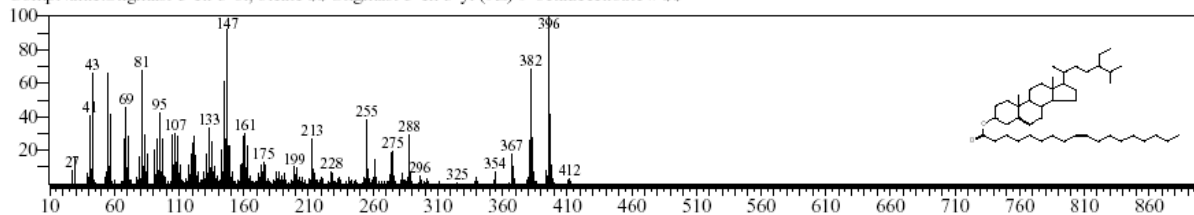

Hit#:3 Entry:30283 Library:NIST11s.lib

SI:82 Formula:C28H45ClO2 CAS:7144-08-3 MolWeight:448 RetIndex:2813

CompName:Cholest-5-en-3-ol (3.beta.)-, carbonochloride \$\$ Cholesterol, chloroformate \$\$ Cholesteryl chloroformate \$\$ Cholesteryloxycarbonyl chloride

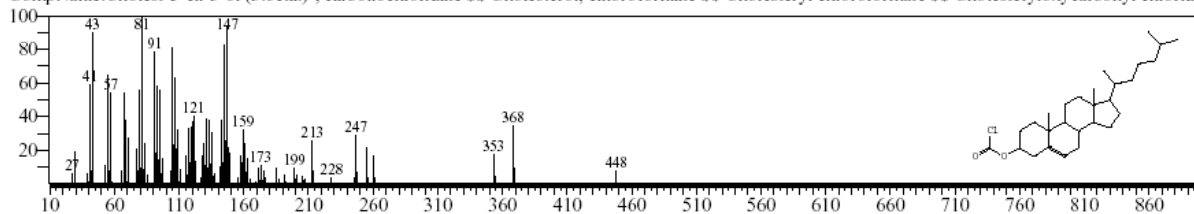

Hit#:4 Entry:210195 Library:NIST11s.lib

SI:80 Formula:C41H72O2 CAS:1989-52-2 MolWeight:596 RetIndex:3929

CompName:Cholest-5-en-3-ol (3.beta.)-, tetradecanoate \$\$ Cholesterol, myristate \$\$ Cholesteryl myristate \$\$ Cholesteryl tetradecanoate \$\$ Cholesteryl myri

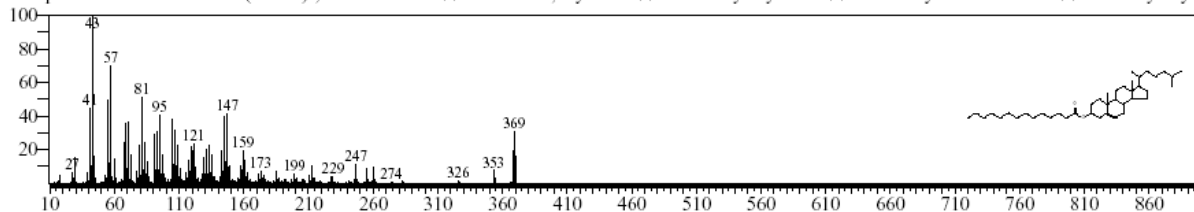

Hit#:5 Entry:29932 Library:NIST11s.lib

SI:79 Formula:C29H50O CAS:83-46-5 MolWeight:414 RetIndex:2731

CompName:.beta.-Sitosterol \$\$ Stigmast-5-en-3-ol, (3.beta.)- \$\$ Stigmast-5-en-3.beta.-ol \$\$ .alpha.-Dihydrofucosterol \$\$ .beta.-Sitosterin \$\$ Angelicin \$\$ /

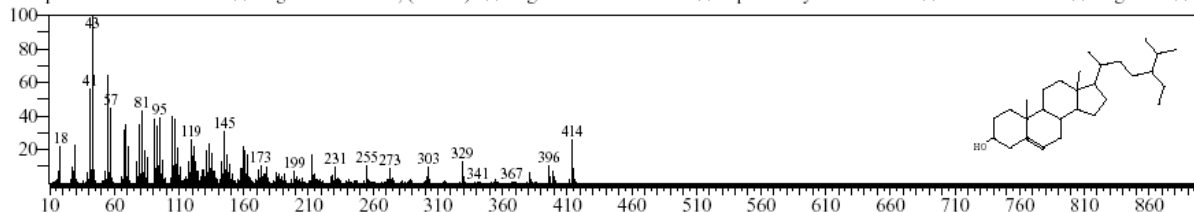

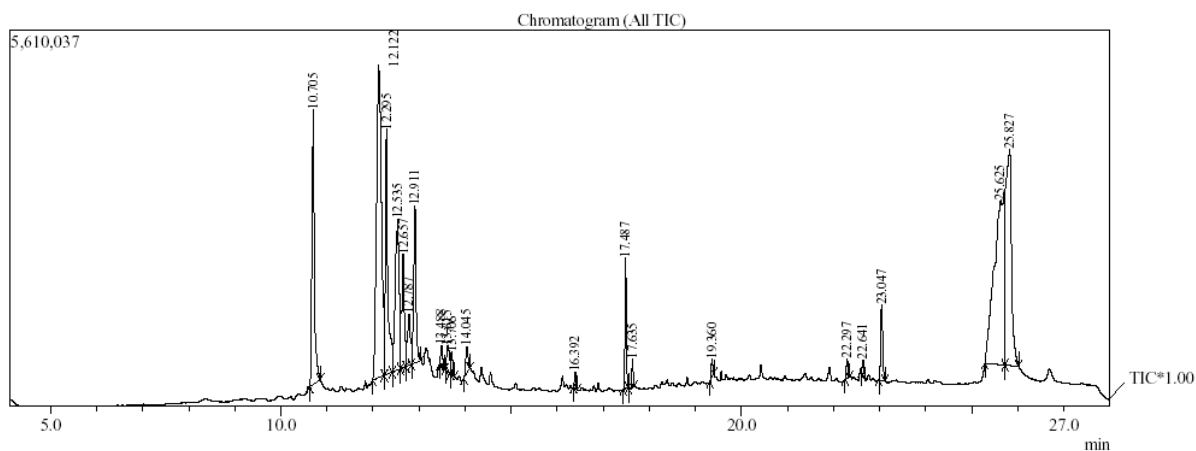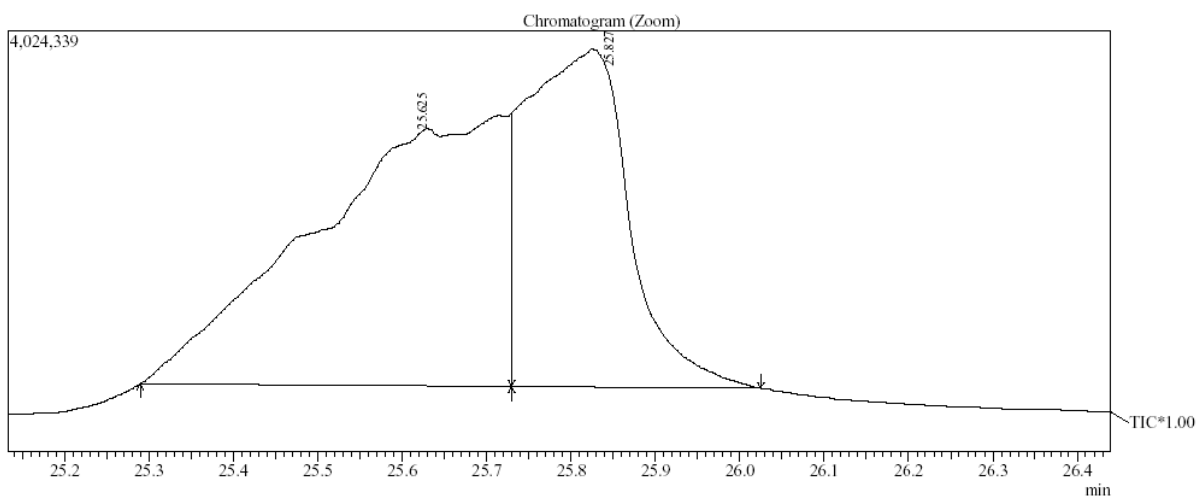

Spectrum

Line#:1 R.Time:25.825(Scan#:4346)  
 MassPeaks:814  
 RawMode:Single 25.825(4346) BasePeak:317.15(534028)  
 BG Mode:None Group 1 - Event 1 Scan

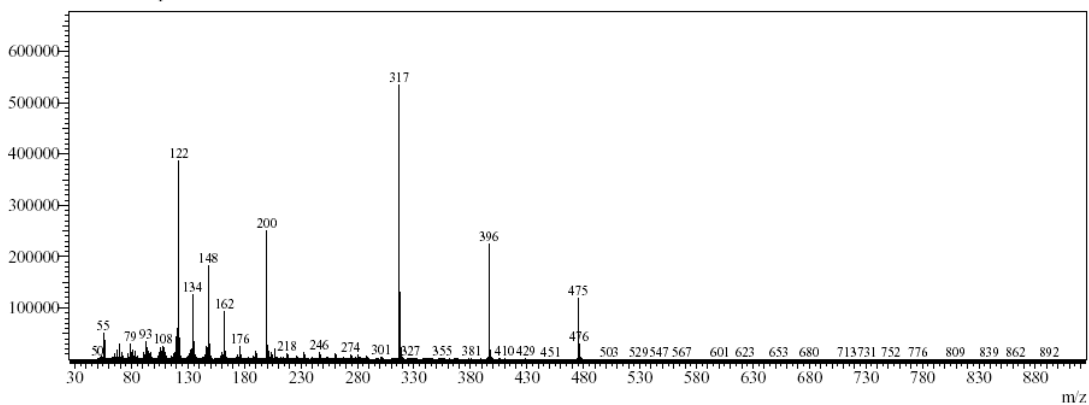



## Library Search

&lt;&lt; Target &gt;&gt;

Line#:1 R.Time:25.825(Scan#:4346) MassPeaks:814

RawMode:Single 25.825(4346) BasePeak:317.15(10000)

BG Mode:None Group 1 - Event 1 Scan

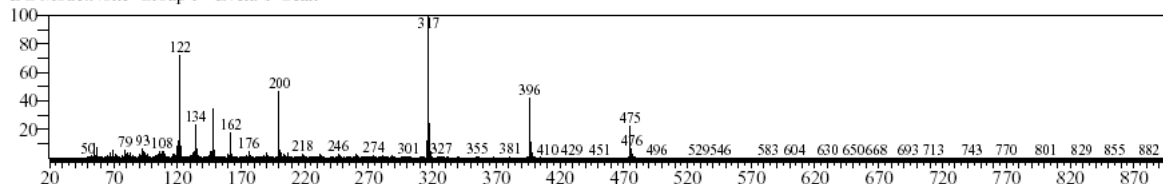

Hit#:1 Entry:204322 Library:NIST11.lib

SI:54 Formula:C32H48O2S CAS:77638-16-5 MolWeight:496 RetIndex:3846

CompName:4-Tetradecyloxybenzenethiolic acid, S-(4-pentylphenyl)- ester SS S-(4-Pentylphenyl) 4-(tetradecyloxy)benzenecarbothioate # SS

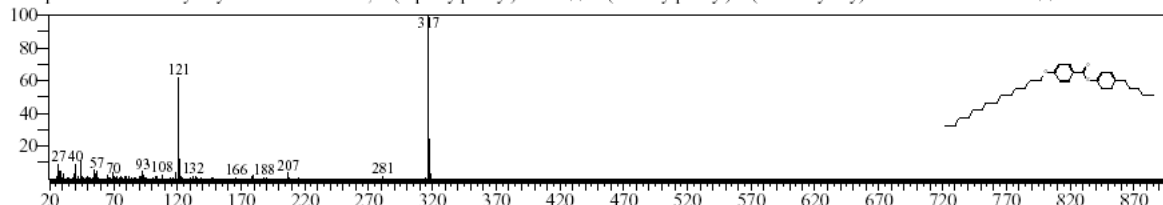

Hit#:2 Entry:197326 Library:NIST11.lib

SI:53 Formula:C29H40O4 CAS:0-00-0 MolWeight:452 RetIndex:3355

CompName:Isophthalic acid, dodecyl 2-isopropylphenyl ester

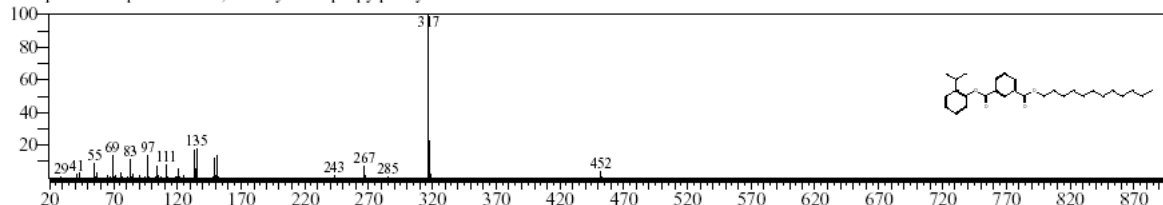

Hit#:3 Entry:131492 Library:NIST11.lib

SI:53 Formula:C14H8F5NO2 CAS:297149-72-5 MolWeight:317 RetIndex:1930

CompName:2,3,4,5,6-Pentafluoro-N-(4-methoxyphenyl)benzamide SS Benzamide, N-(4-methoxyphenyl)-2,3,4,5,6-pentafluoro- SS

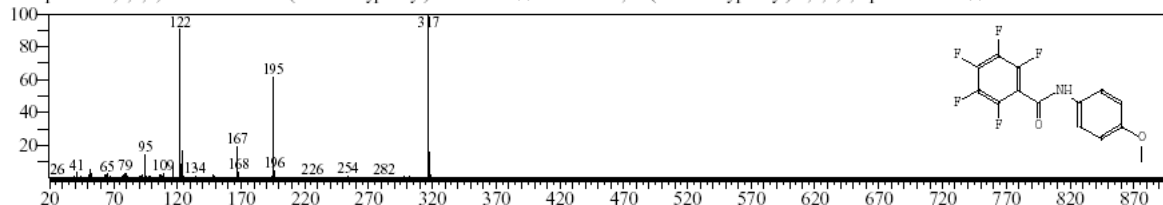

Hit#:4 Entry:191586 Library:NIST11.lib

SI:53 Formula:C26H33FO4 CAS:0-00-0 MolWeight:428 RetIndex:3082

CompName:Isophthalic acid, dodecyl 3-fluorophenyl ester

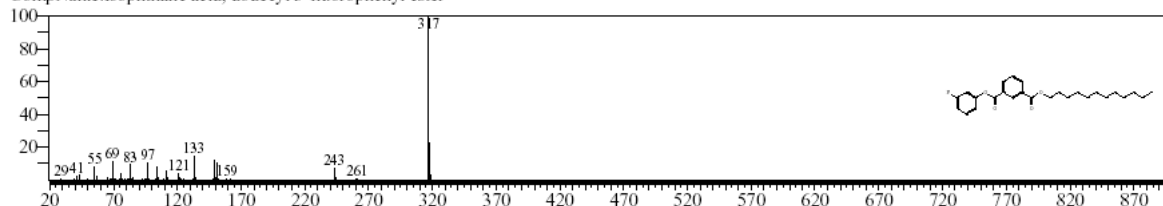

Hit#:5 Entry:180274 Library:NIST11.lib

SI:52 Formula:C12H13IO5S CAS:0-00-0 MolWeight:396 RetIndex:2626

CompName:Coumarin-6-ol, 7-iodo-3,4-dihydro-4,4-dimethyl-, methylsulfonate(ester) SS 7-Iodo-4,4-dimethyl-2-oxo-3,4-dihydro-2H-chromen-6-yl methane-

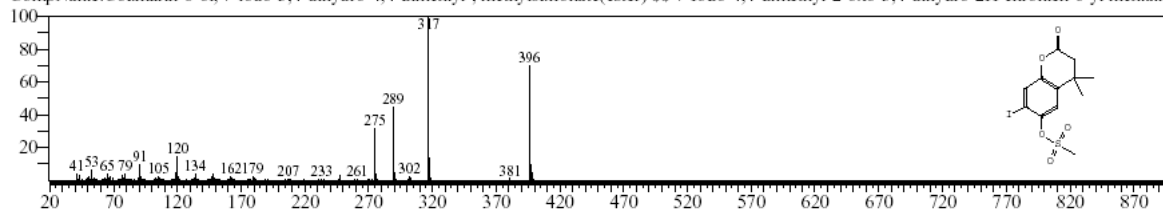

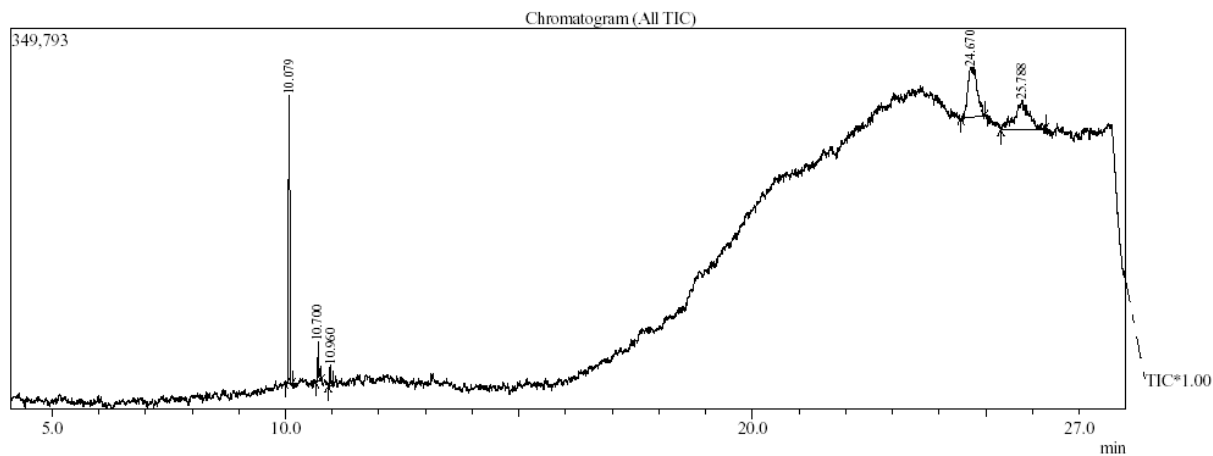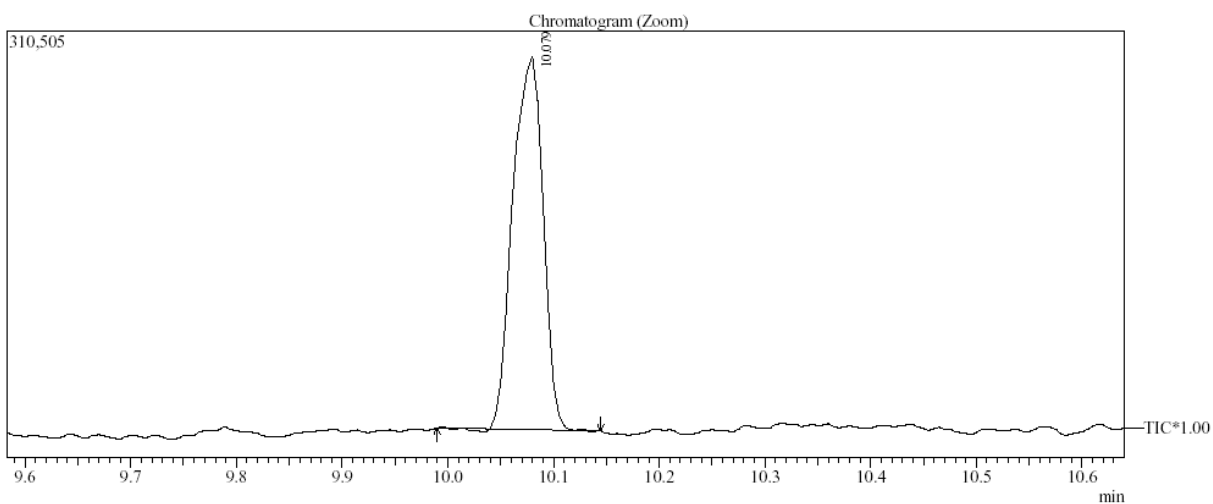

Spectrum

Line#:1 R.Time:10.075(Scan#:1196)  
 MassPeaks:766  
 RawMode:Single 10.075(1196) BasePeak:91.00(112060)  
 BG Mode:None Group 1 - Event 1 Scan

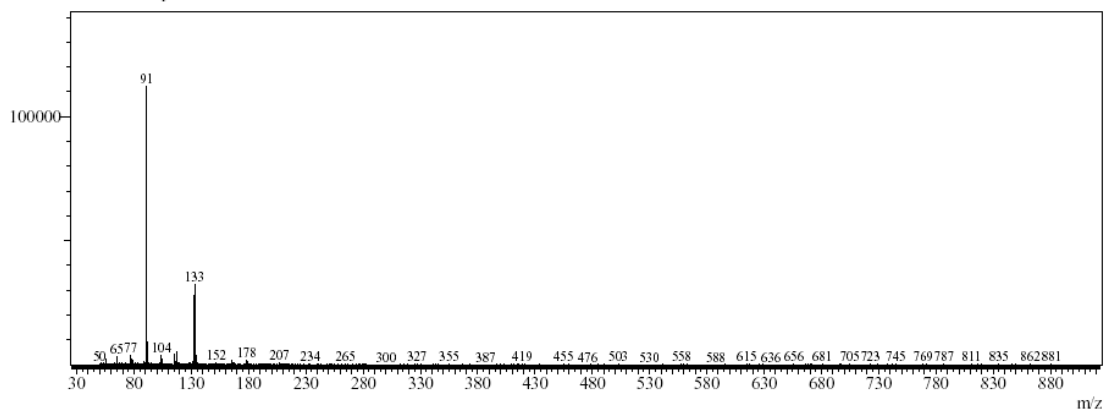

## Library Search

&lt;&lt; Target &gt;&gt;

Line#:1 R.Time:10.075(Scan#:1196) MassPeaks:766

RawMode:Single 10.075(1196) BasePeak:91.00(10000)

BG Mode:None Group 1 - Event 1 Scan

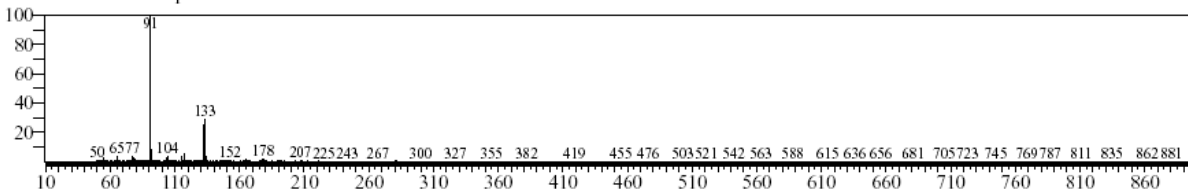

Hit#:1 Entry:8586 Library:NIST11.lib

SI:86 Formula:C10H12 CAS:768-56-9 MolWeight:132 RetIndex:1082

CompName:Benzene, 3-butenyl- \$\$ 1-Butene, 4-phenyl- \$\$ 1-Phenyl-3-butene \$\$ 3-Butenylbenzene \$\$ 4-Phenyl-1-butene \$\$ 4-Phenylbut-1-ene \$\$ 4-Phenyl

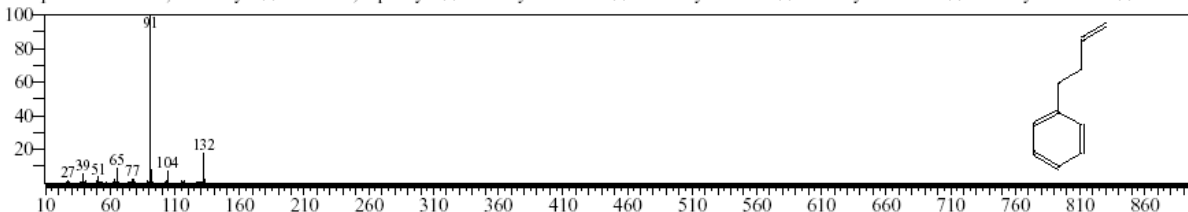

Hit#:2 Entry:29321 Library:NIST11.lib

SI:86 Formula:C13H20 CAS:2132-86-7 MolWeight:176 RetIndex:1326

CompName:Benzene, (1-propylbutyl)- \$\$ Heptane, 4-phenyl- \$\$ 4-Phenylheptane \$\$ (1-Propylbutyl)benzene # \$\$

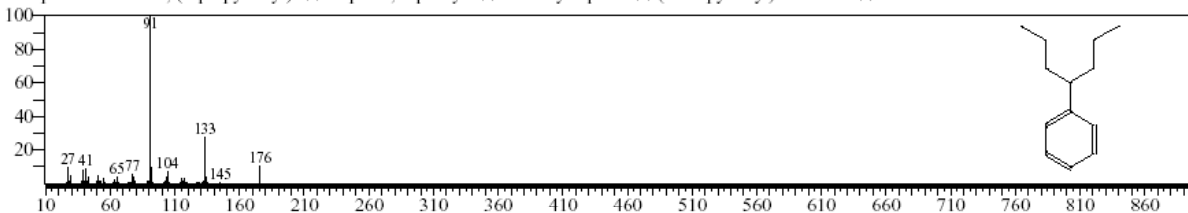

Hit#:3 Entry:76887 Library:NIST11.lib

SI:86 Formula:C18H30 CAS:2719-64-4 MolWeight:246 RetIndex:1823

CompName:Benzene, (1-propylnonyl)- \$\$ Dodecane, 4-phenyl- \$\$ 4-Phenyl-dodecane \$\$ (1-Propylnonyl)benzene # \$\$

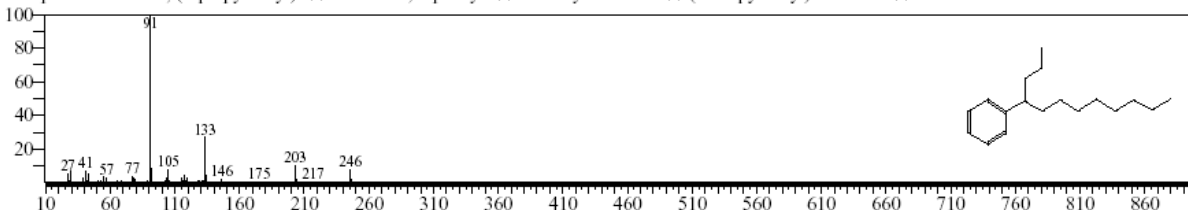

Hit#:4 Entry:22495 Library:NIST11s.lib

SI:86 Formula:C18H30 CAS:2719-64-4 MolWeight:246 RetIndex:1823

CompName:Benzene, (1-propylnonyl)- \$\$ Dodecane, 4-phenyl- \$\$ 4-Phenyl-dodecane \$\$ (1-Propylnonyl)benzene # \$\$

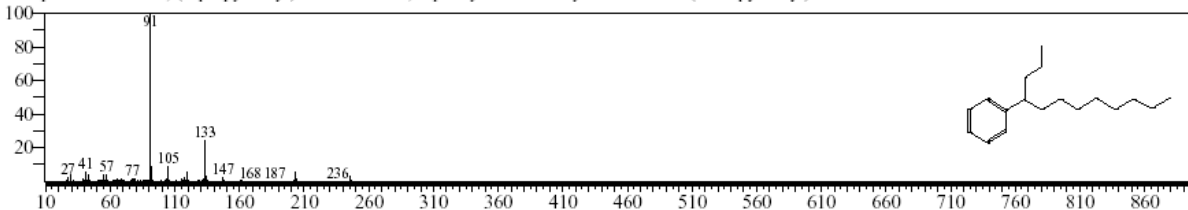

Hit#:5 Entry:5918 Library:NIST11s.lib

SI:86 Formula:C10H12 CAS:768-56-9 MolWeight:132 RetIndex:1082

CompName:Benzene, 3-butenyl- \$\$ 1-Butene, 4-phenyl- \$\$ 1-Phenyl-3-butene \$\$ 3-Butenylbenzene \$\$ 4-Phenyl-1-butene \$\$ 4-Phenylbut-1-ene \$\$ 4-Phenyl

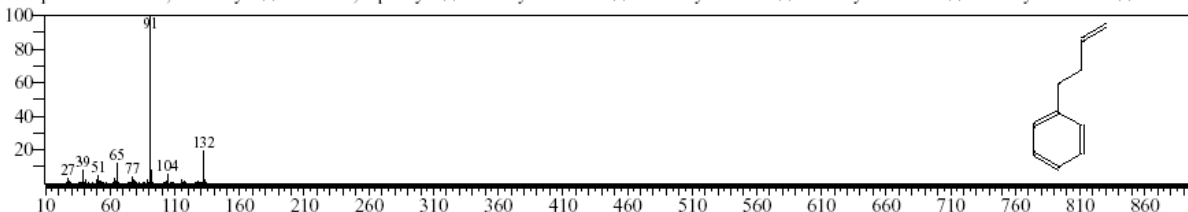

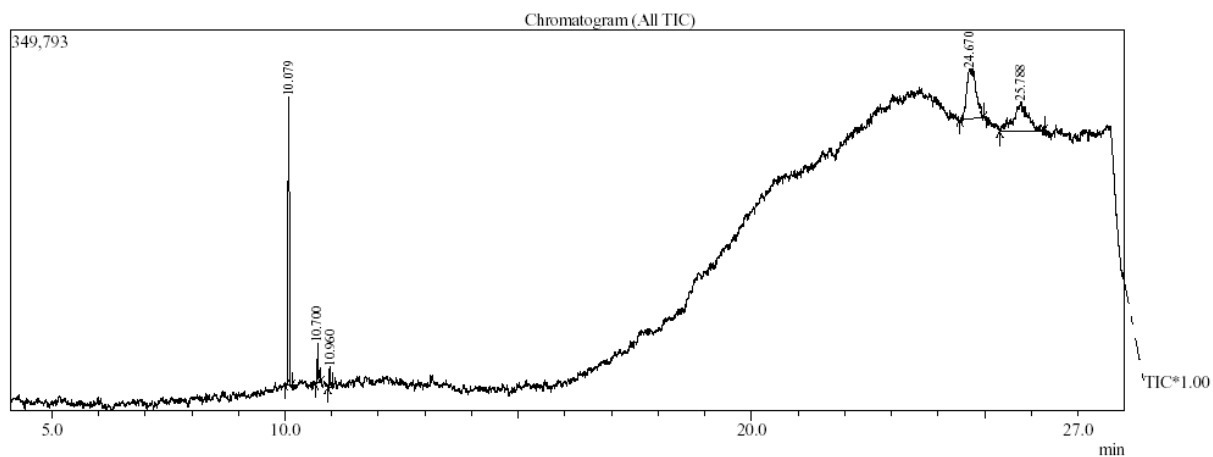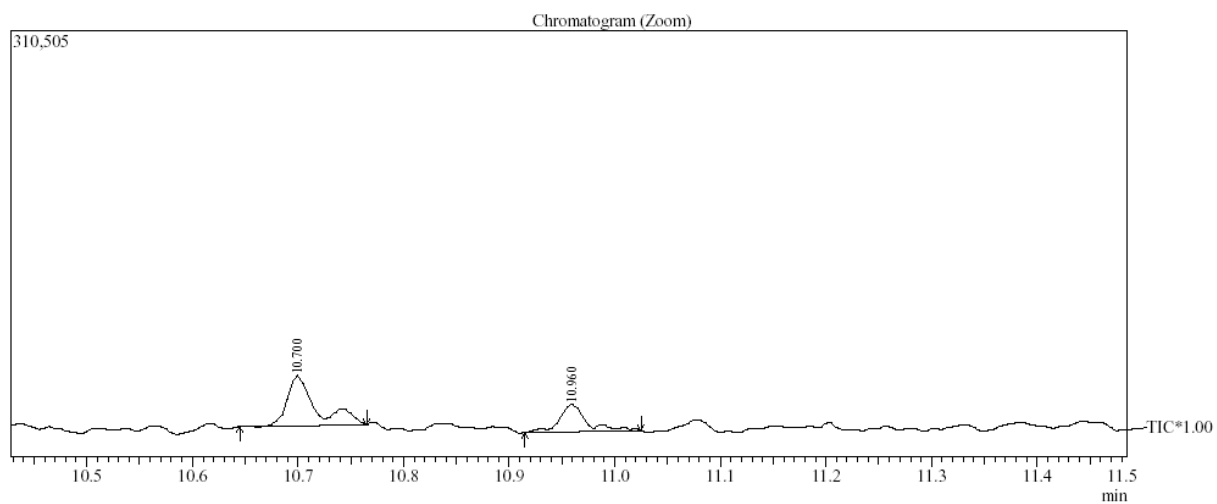

Spectrum

Line#:1 R.Time:10.700(Scan#:1321)  
 MassPeaks:745  
 RawMode:Single 10.700(1321) BasePeak:105.00(12815)  
 BG Mode:None Group 1 - Event 1 Scan

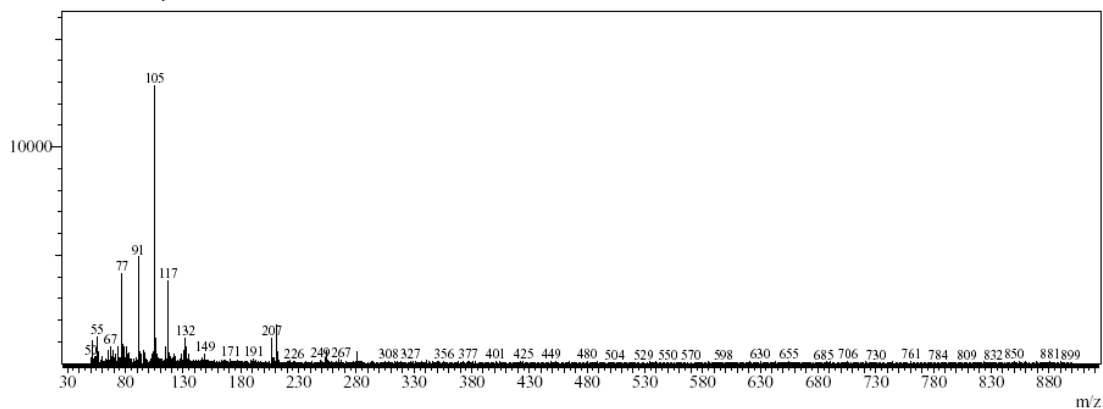

## Library Search

&lt;&lt; Target &gt;&gt;

Line#:1 R.Time:10.700(Scan#:1321) MassPeaks:745  
RawMode:Single 10.700(1321) BasePeak:105.00(10000)  
BG Mode:None Group 1 - Event 1 Scan

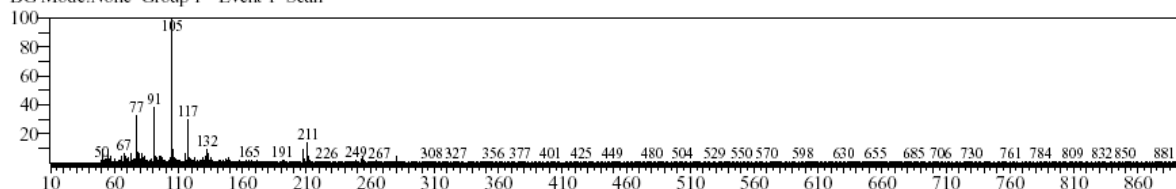

Hit#:1 Entry:72377 Library:NIST11.lib  
SI:76 Formula:C16H16O2 CAS:0-00-0 MolWeight:240 RetIndex:1868  
CompName:Benzoic acid, 1-phenylpropyl ester

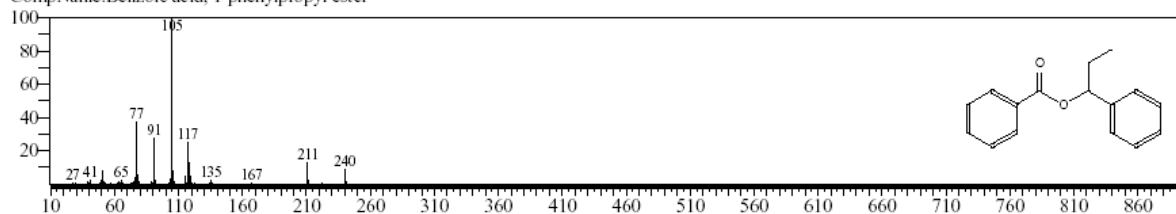

Hit#:2 Entry:23625 Library:NIST11.lib  
SI:75 Formula:C11H18O CAS:128-50-7 MolWeight:166 RetIndex:1290  
CompName:Bicyclo[3.1.1]hept-2-ene-2-ethanol, 6,6-dimethyl- \$\$ 2-Norpinene-2-ethanol, 6,6-dimethyl- \$\$ Homomyrtenol \$\$ Nopol \$\$ Nopol (terpene) \$\$

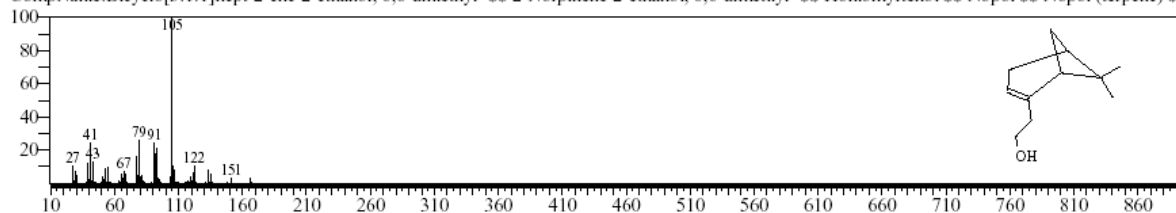

Hit#:3 Entry:140172 Library:NIST11.lib  
SI:75 Formula:C20H24O4 CAS:108511-78-0 MolWeight:328 RetIndex:2325  
CompName:2-Benzoyloxy-1,1,10-trimethyl-6,9-epidioxy-7-octalin

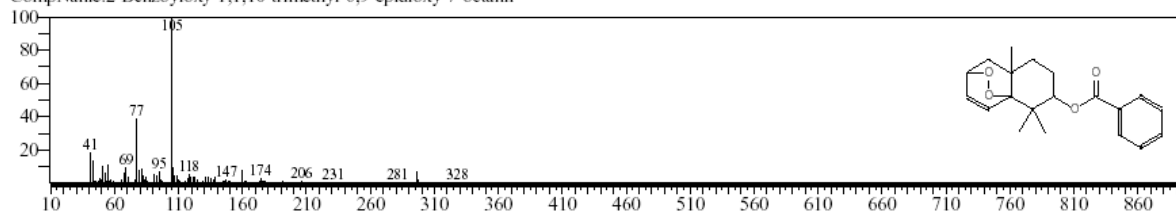

Hit#:4 Entry:12090 Library:NIST11s.lib  
SI:75 Formula:C11H18O CAS:128-50-7 MolWeight:166 RetIndex:1290  
CompName:Bicyclo[3.1.1]hept-2-ene-2-ethanol, 6,6-dimethyl- \$\$ 2-Norpinene-2-ethanol, 6,6-dimethyl- \$\$ Homomyrtenol \$\$ Nopol \$\$ Nopol (terpene) \$\$

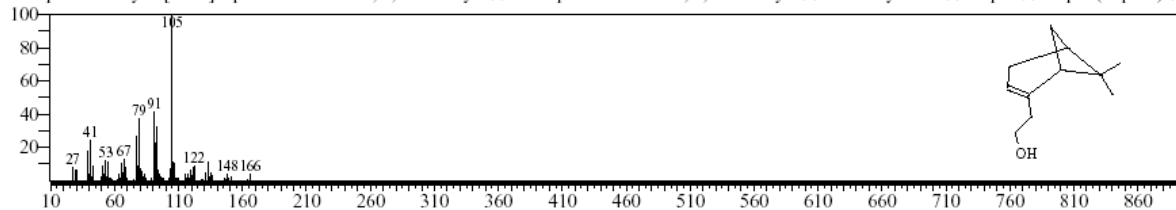

Hit#:5 Entry:14666 Library:NIST11.lib  
SI:74 Formula:C11H16 CAS:113003-13-7 MolWeight:148 RetIndex:1037  
CompName:Bicyclo[4.1.0]hept-3-ene, 7,7-dimethyl-3-vinyl- \$\$ 7,7-Dimethyl-3-vinylbicyclo[4.1.0]hept-3-ene # \$\$

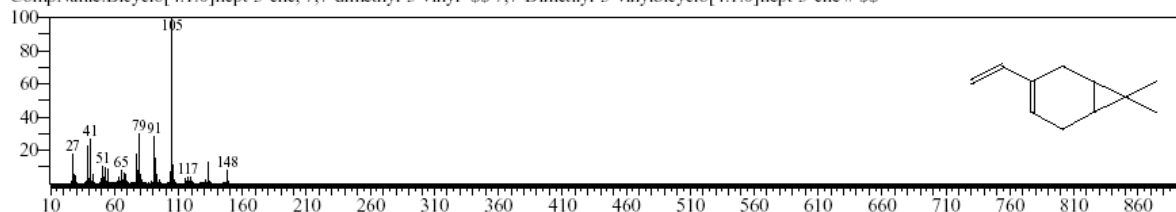

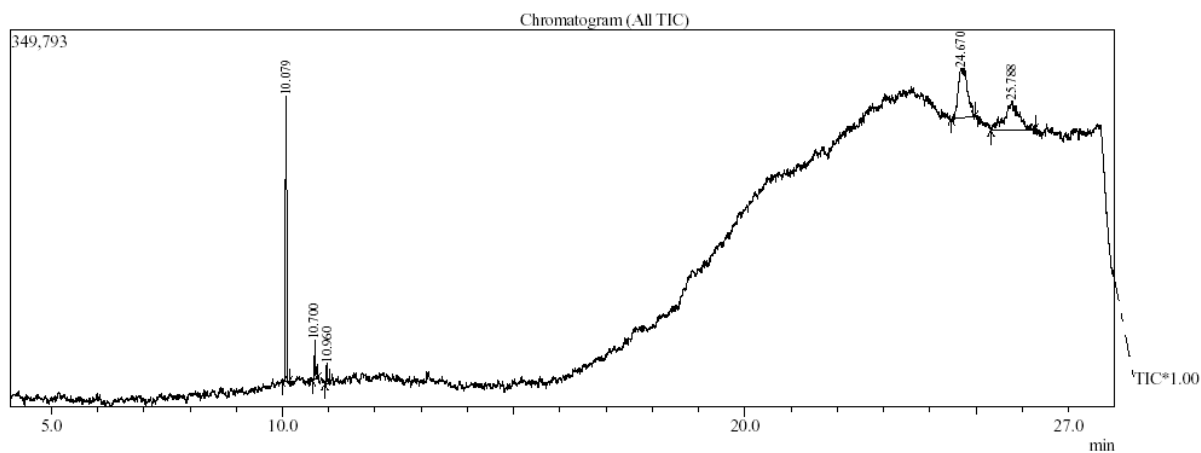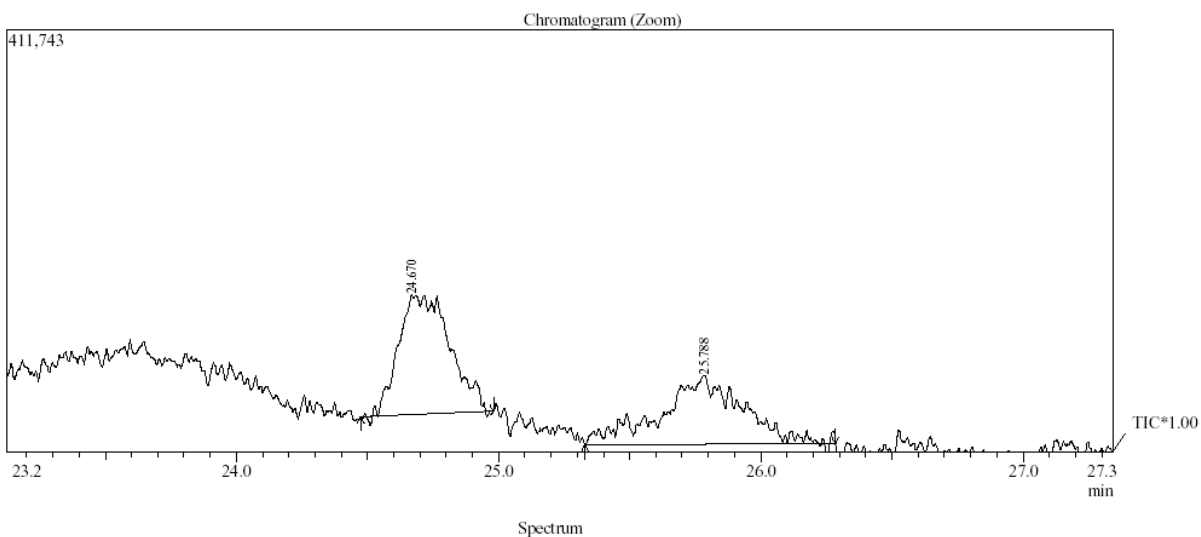

Line#:1 R.Time:24.685(Scan#:4118)  
 MassPeaks:816  
 RawMode:Single 24.685(4118) BasePeak:206.90(23313)  
 BG Mode:None Group 1 - Event 1 Scan

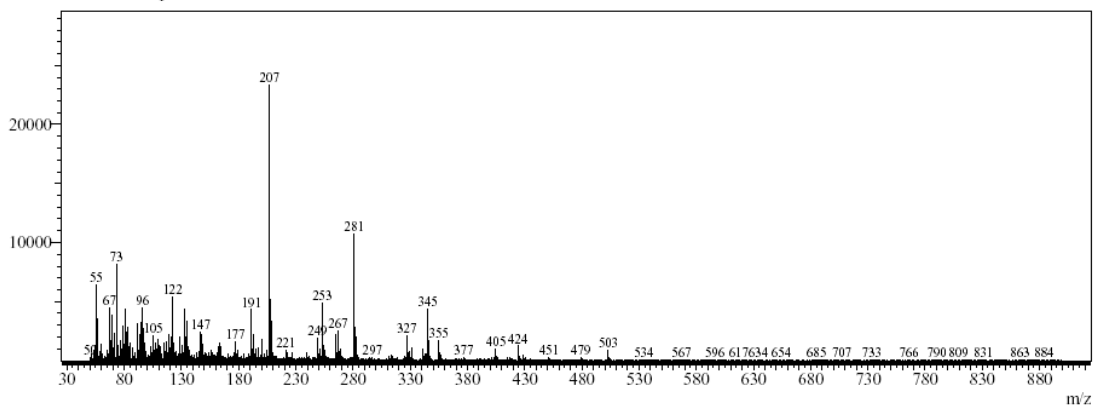



## Library Search

&lt;&lt; Target &gt;&gt;

Line#:1 R.Time:24.685(Scan#:4118) MassPeaks:816  
RawMode:Single 24.685(4118) BasePeak:206.90(10000)  
BG Mode:None Group 1 - Event 1 Scan

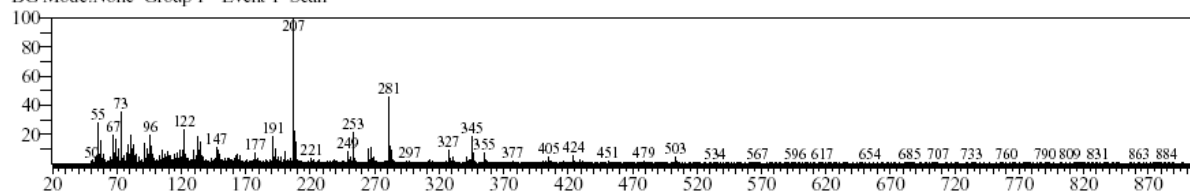

Hit#:1 Entry:204469 Library:NIST11.lib

SI:60 Formula:C27H54O4Si2 CAS:54284-45-6 MolWeight:498 RetIndex:2796

CompName:1-Monolinoleoylglycerol trimethylsilyl ether \$\$ 9,12-Octadecadienoic acid (Z,Z)-, 2,3-bis[(trimethylsilyl)oxy]propyl ester \$\$ 2,3-Bis[(trimethylsilyl)oxy]propyl ester

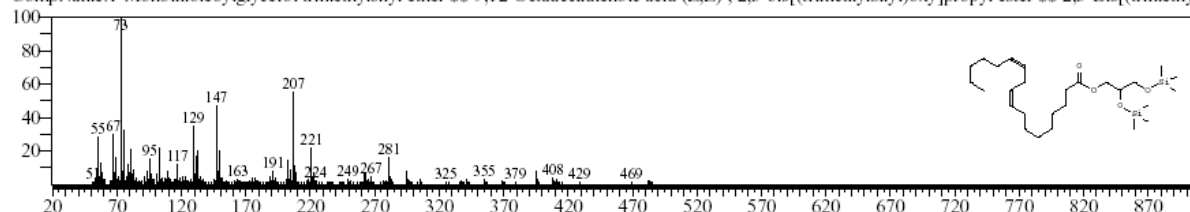

Hit#:2 Entry:191658 Library:NIST11.lib

SI:58 Formula:C28H44O3 CAS:7604-99-1 MolWeight:428 RetIndex:2889

CompName:Pseudoarsasapogenin-5,20-dien methyl ether \$\$ 26-Methoxyfurosta-5,20(22)-dien-3-ol # \$\$

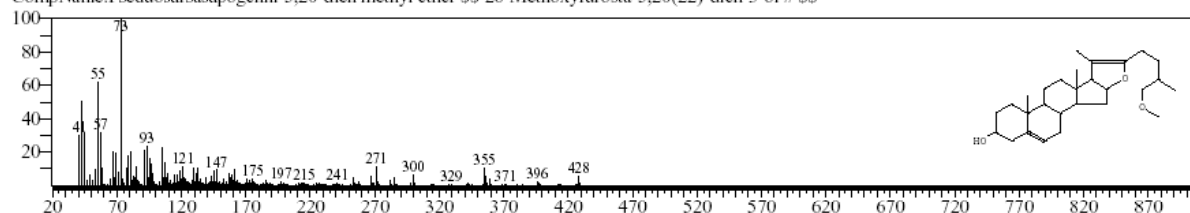

Hit#:3 Entry:21597 Library:NIST11s.lib

SI:57 Formula:C12H16N2O3 CAS:52-31-3 MolWeight:236 RetIndex:2022

CompName:Cyclobarbitol \$\$ 2,4,6-(1H,3H,5H)-Pyrimidinetrione, 5-(1-cyclohexen-1-yl)-5-ethyl- \$\$ Barbituric acid, 5-(1-cyclohexen-1-yl)-5-ethyl- \$\$ Adorn

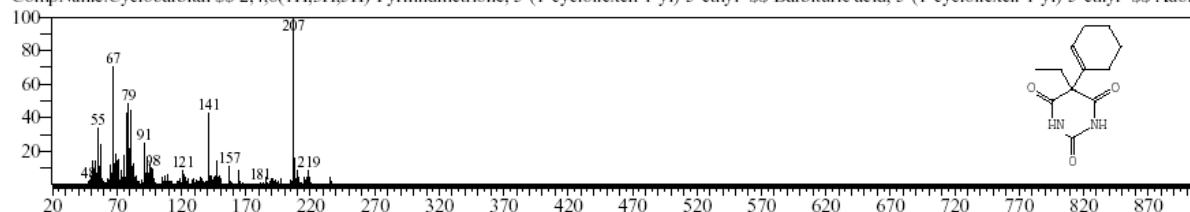

Hit#:4 Entry:102613 Library:NIST11.lib

SI:56 Formula:C16H28N2O2 CAS:0-00-0 MolWeight:280 RetIndex:2439

CompName:2-Myristinoyl-glycinamide \$\$ N-(2-Amino-2-oxoethyl)-2-tetradecynamide # \$\$

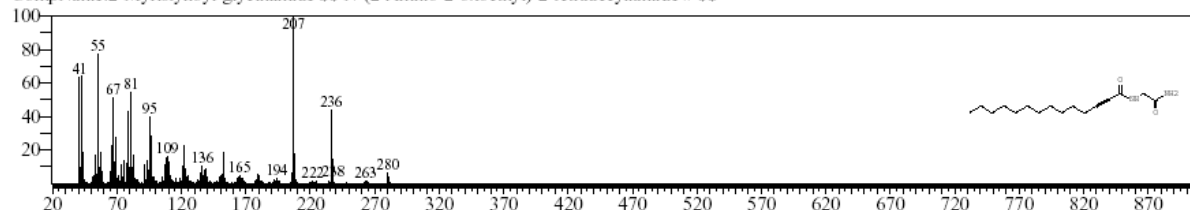

Hit#:5 Entry:200211 Library:NIST11.lib

SI:56 Formula:C27H42B2O3S CAS:0-00-0 MolWeight:468 RetIndex:0

CompName:1,8-Dioxo-5-thiaoctane, 8-(9-borabicyclo[3.3.1]non-9-yl)-3-(9-borabicyclo[3.3.1]non-9-yloxy)-1-phenyl- \$\$ 2-(9-Borabicyclo[3.3.1]non-9-yloxy)-1-phenyl-5-thiaoctane-1,8-dione

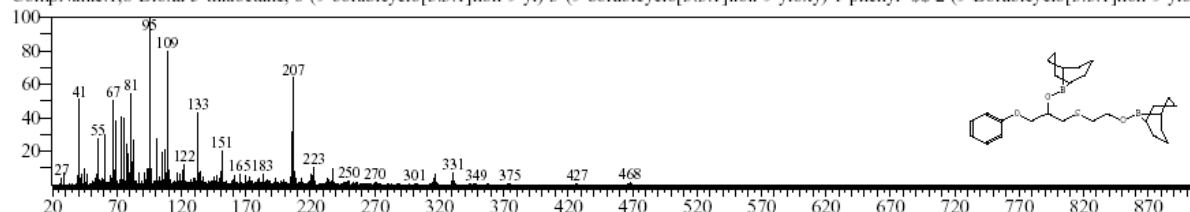

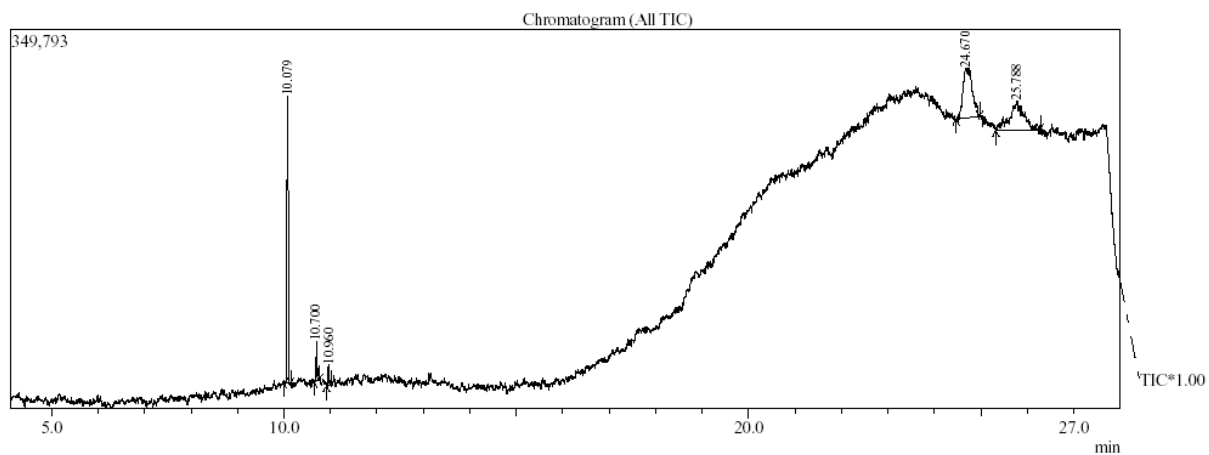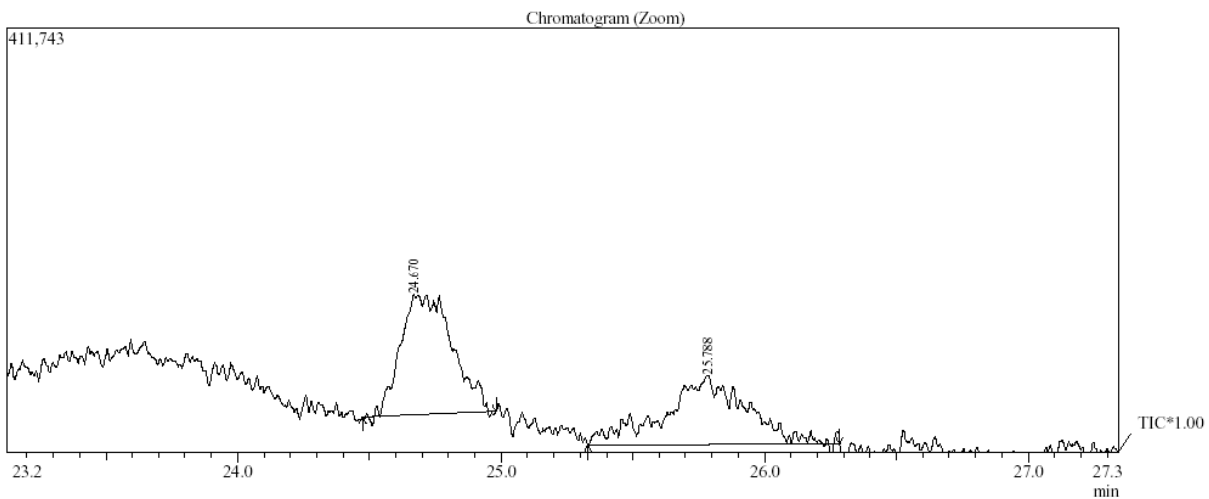

Spectrum

Line#:1 R.Time:25.775(Scan#:4336)  
 MassPeaks:814  
 RawMode:Single 25.775(4336) BasePeak:206.90(24750)  
 BG Mode:None Group 1 - Event 1 Scan

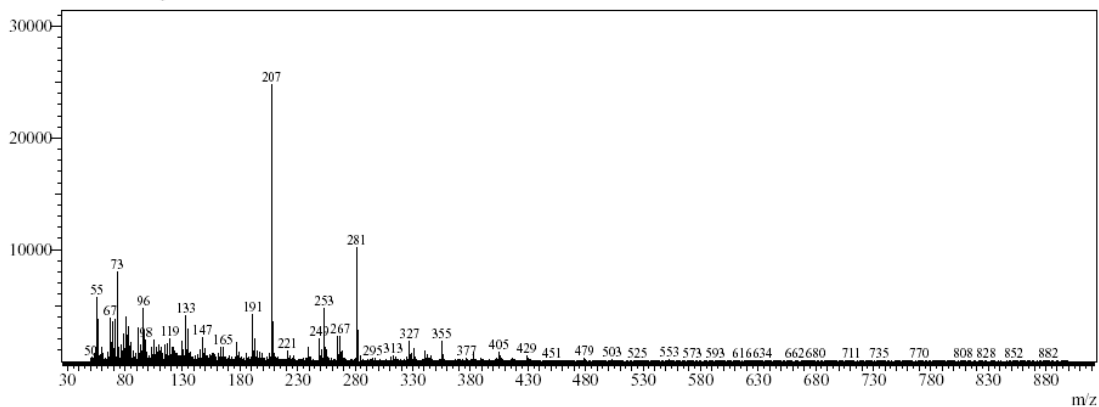

## Library Search

&lt;&lt; Target &gt;&gt;

Line#:1 R.Time:25.775(Scan#:4336) MassPeaks:814

RawMode:Single 25.775(4336) BasePeak:206.90(10000)

BG Mode:None Group 1 - Event 1 Scan

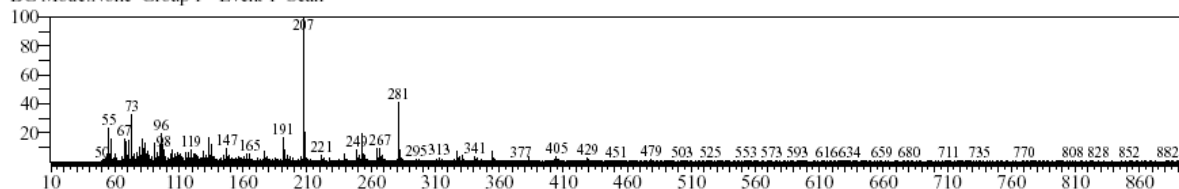

Hit#:1 Entry:204469 Library:NIST11.lib

SI:61 Formula:C<sub>27</sub>H<sub>54</sub>O<sub>4</sub>Si<sub>2</sub> CAS:54284-45-6 MolWeight:498 RetIndex:2796

CompName:1-Monolinoleoylglycerol trimethylsilyl ether \$\$ 9,12-Octadecadienoic acid (Z,Z)-, 2,3-bis[(trimethylsilyl)oxy]propyl ester \$\$ 2,3-Bis[(trimethyl-

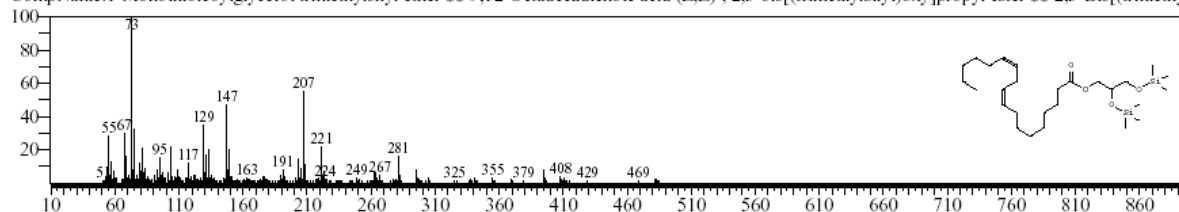

Hit#:2 Entry:58988 Library:NIST11.lib

SI:58 Formula:C<sub>12</sub>H<sub>22</sub>Si<sub>2</sub> CAS:17151-09-6 MolWeight:222 RetIndex:1124

CompName:1,2-Bis(trimethylsilyl)benzene \$\$ Trimethyl[2-(trimethylsilyl)phenyl]silane # \$\$

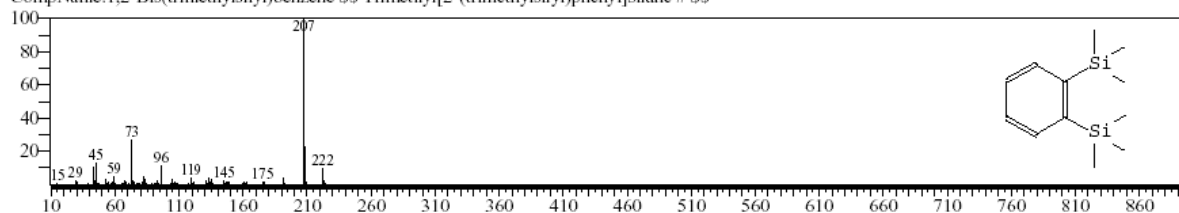

Hit#:3 Entry:21597 Library:NIST11s.lib

SI:58 Formula:C<sub>12</sub>H<sub>16</sub>N<sub>2</sub>O<sub>3</sub> CAS:52-31-3 MolWeight:236 RetIndex:2022

CompName:Cyclobarbitol \$\$ 2,4,6(1H,3H,5H)-Pyrimidinetrione, 5-(1-cyclohexen-1-yl)-5-ethyl- \$\$ Barbituric acid, 5-(1-cyclohexen-1-yl)-5-ethyl- \$\$ Adorr

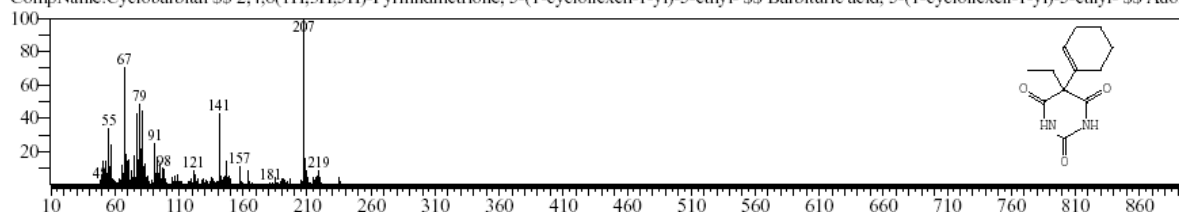

Hit#:4 Entry:58989 Library:NIST11.lib

SI:58 Formula:C<sub>12</sub>H<sub>22</sub>Si<sub>2</sub> CAS:13183-70-5 MolWeight:222 RetIndex:1124

CompName:1,4-Bis(trimethylsilyl)benzene \$\$ Silane, 1,4-phenylenebis[trimethyl- \$\$ Silane, p-phenylenebis[trimethyl- \$\$ p-Bis(trimethylsilyl)benzene \$\$ B-

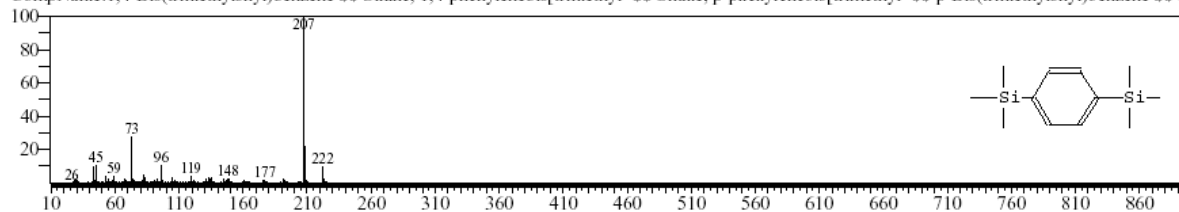

Hit#:5 Entry:172707 Library:NIST11.lib

SI:57 Formula:C<sub>21</sub>H<sub>40</sub>F<sub>3</sub>NO CAS:0-00-0 MolWeight:379 RetIndex:2343

CompName:1-Aminononadecane, N-trifluoroacetyl-

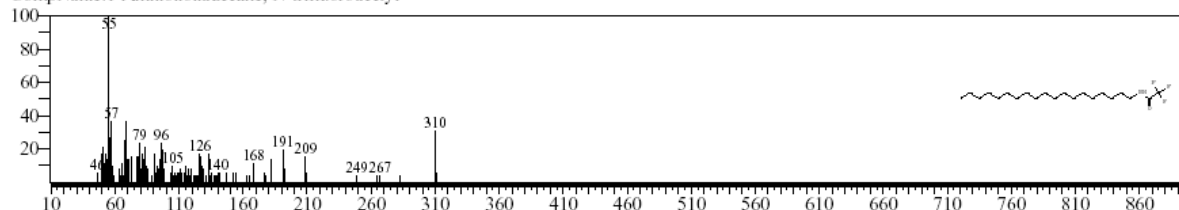

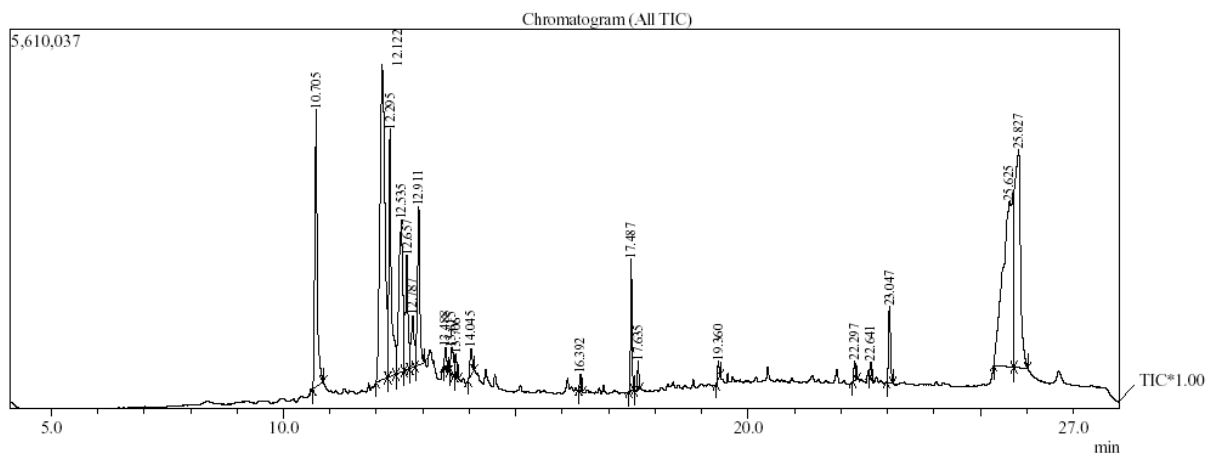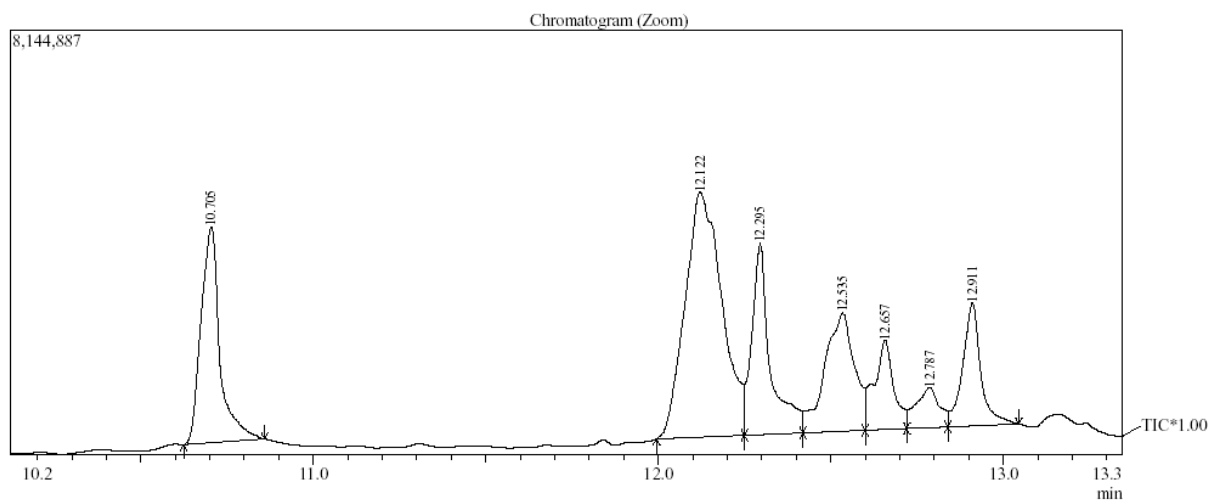

Spectrum

Line#:1 R.Time:12.120(Scan#:1605)  
 MassPeaks:767  
 RawMode:Single 12.120(1605) BasePeak:55.05(346328)  
 BG Mode:None Group 1 - Event 1 Scan

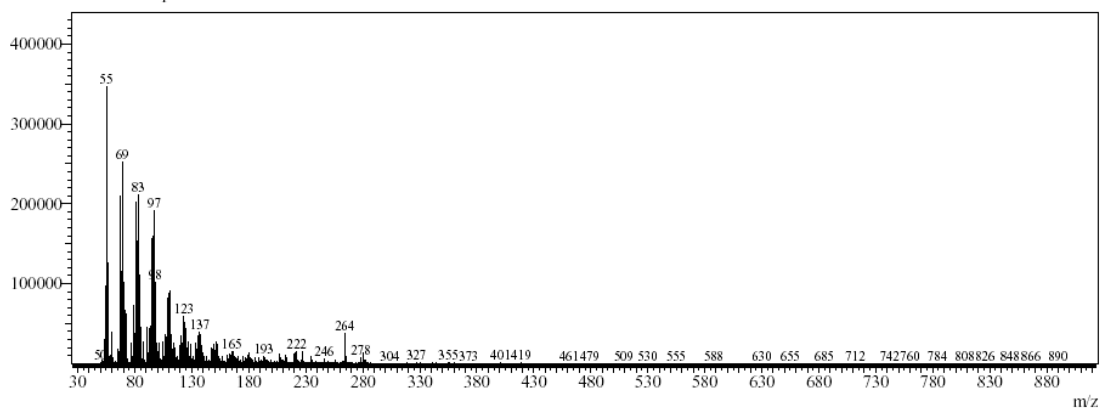

## Library Search

&lt;&lt; Target &gt;&gt;

Line#1 R.Time:12.120(Scan#:1605) MassPeaks:767

RawMode:Single 12.120(1605) BasePeak:55.05(10000)

BG Mode:None Group 1 - Event 1 Scan

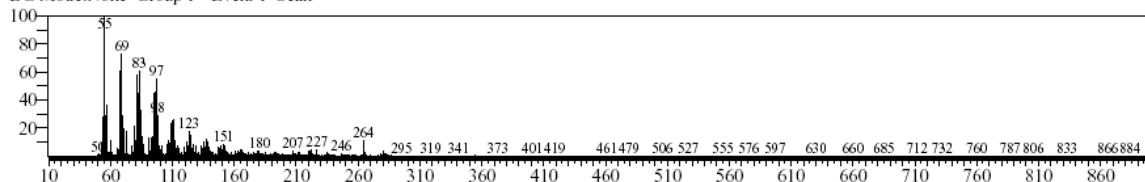

Hit#1 Entry:212763 Library:NIST11.lib

SI:90 Formula:C57H104O6 CAS:537-39-3 MolWeight:884 RetIndex:6149

CompName:9-Octadecenoic acid, 1,2,3-propanetriyl ester, (E,E,E)- \$\$ 2,3-Bis[(9E)-9-octadecenoyloxy]propyl (9E)-9-octadecenoate # \$\$

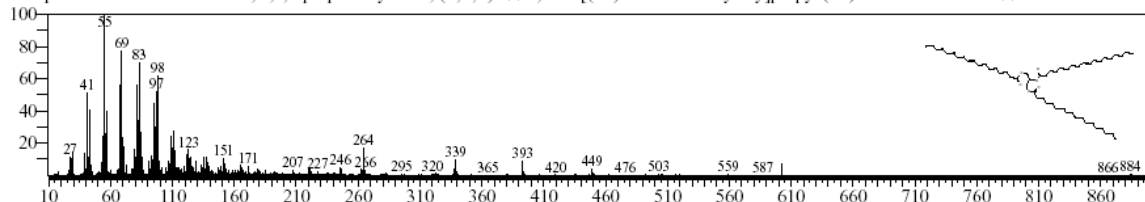

Hit#2 Entry:70898 Library:NIST11.lib

SI:90 Formula:C16H30O CAS:56219-04-6 MolWeight:238 RetIndex:1808

CompName:cis-9-Hexadecenal \$\$ 9-Hexadecenal, (Z)- \$\$ (Z)-9-Hexadecenal \$\$ Z-9-Hexadecenal \$\$ (9Z)-9-Hexadecenal # \$\$

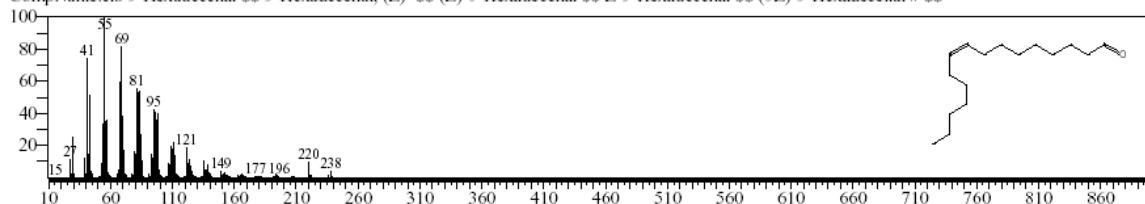

Hit#3 Entry:18866 Library:NIST11s.lib

SI:90 Formula:C14H26O CAS:53939-27-8 MolWeight:210 RetIndex:1609

CompName:9-Tetradecenal, (Z)- \$\$ (Z)-9-Tetradecenal \$\$ Z-9-Tetradecenal \$\$ (9Z)-9-Tetradecenal \$\$ (Z)-9-Tetradecen-1-al \$\$ 9-Tetradecenal, (9Z)- \$\$ (Z)-9-Tetradecenal, (Z)- \$\$ (Z)-9-Tetradecenal # \$\$(Z)-9-Tetradecenal

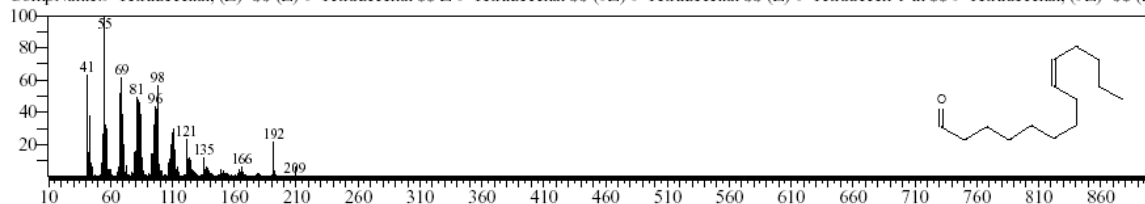

Hit#4 Entry:18867 Library:NIST11s.lib

SI:89 Formula:C14H26O CAS:53939-27-8 MolWeight:210 RetIndex:1609

CompName:9-Tetradecenal, (Z)- \$\$ (Z)-9-Tetradecenal \$\$ Z-9-Tetradecenal \$\$ (9Z)-9-Tetradecenal \$\$ (Z)-9-Tetradecen-1-al \$\$ 9-Tetradecenal, (9Z)- \$\$ (Z)-9-Tetradecenal, (Z)- \$\$ (Z)-9-Tetradecenal # \$\$(Z)-9-Tetradecenal

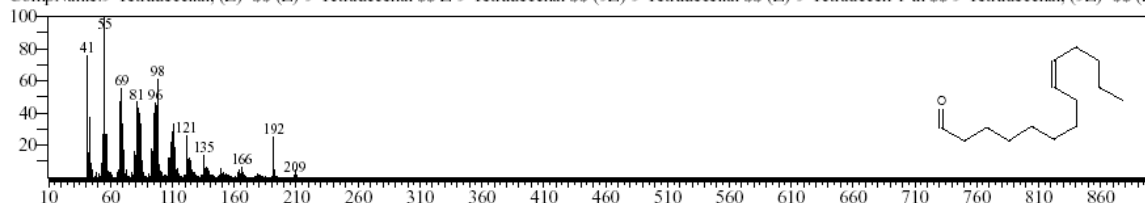

Hit#5 Entry:25042 Library:NIST11s.lib

SI:89 Formula:C18H34O2 CAS:112-79-8 MolWeight:282 RetIndex:2175

CompName:9-Octadecenoic acid, (E)- \$\$ trans-.delta.(sup 9)-Octadecenoic acid \$\$ trans-.delta.9-Octadecenoic acid \$\$ trans-Octadec-9-enoic acid \$\$ trans-

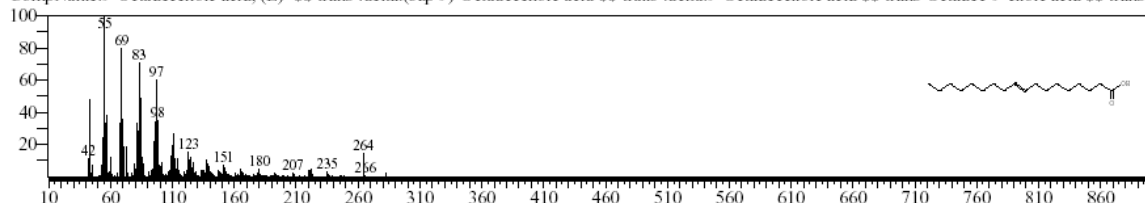

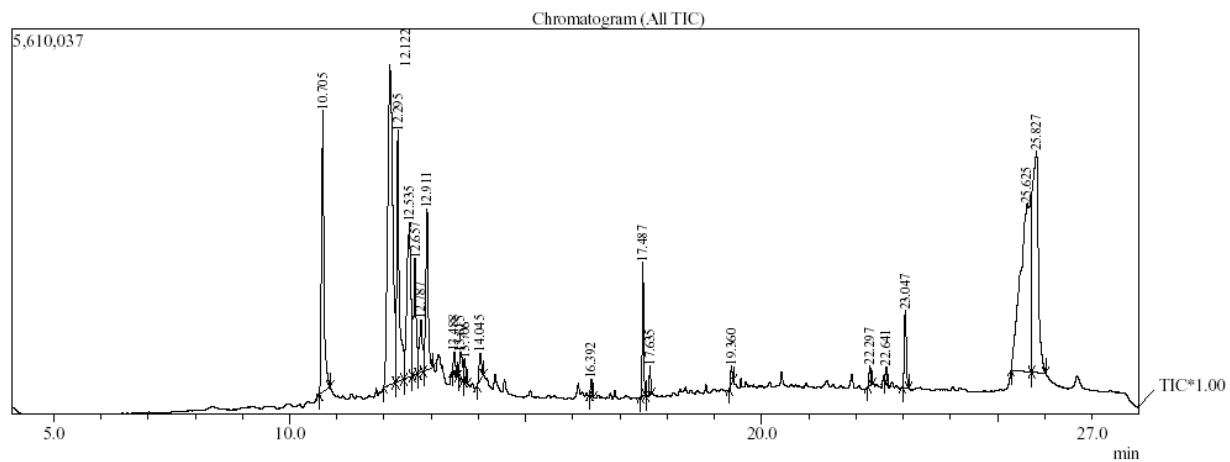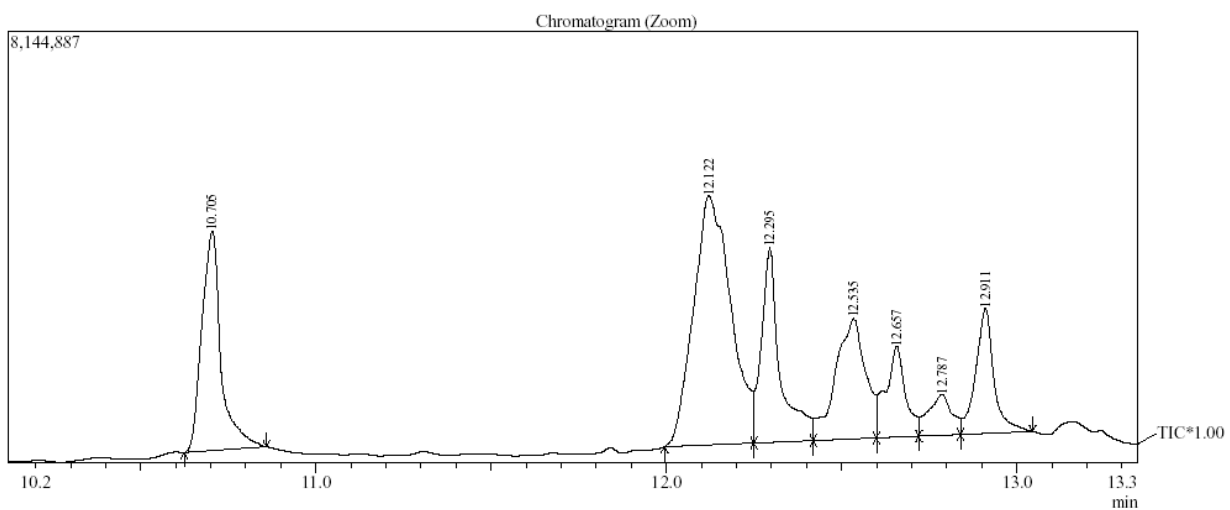

Spectrum

Line#:1 R.Time:12.295(Scan#:1640)  
 MassPeaks:786  
 RawMode:Single 12.295(1640) BasePeak:55.05(227756)  
 BG Mode:None Group 1 - Event 1 Scan

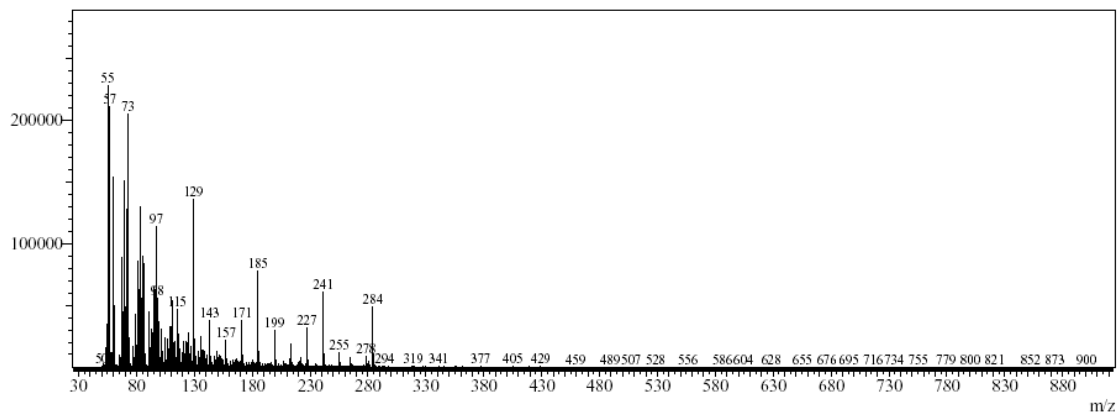

## Library Search

&lt;&lt; Target &gt;&gt;

Line#:1 R.Time:12.295(Scan#:1640) MassPeaks:786

RawMode:Single 12.295(1640) BasePeak:55.05(10000)

BG Mode:None Group 1 - Event 1 Scan

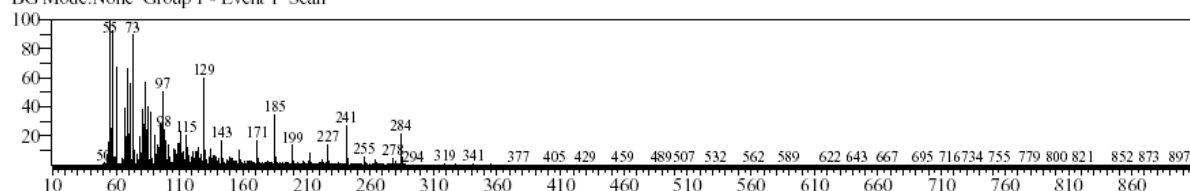

Hit#:1 Entry:106158 Library:NIST11.lib

SI:84 Formula:C18H36O2 CAS:57-11-4 MolWeight:284 RetIndex:2167

CompName:Octadecanoic acid \$\$ Stearic acid \$\$ n-Octadecanoic acid \$\$ Humko Industrene R \$\$ Hydrofol Acid 150 \$\$ Hystrene S-97 \$\$ Hystrene T-70 S

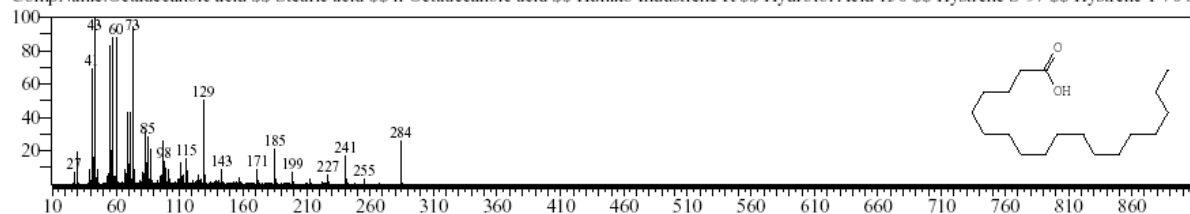

Hit#:2 Entry:25165 Library:NIST11s.lib

SI:83 Formula:C18H36O2 CAS:57-11-4 MolWeight:284 RetIndex:2167

CompName:Octadecanoic acid \$\$ Stearic acid \$\$ n-Octadecanoic acid \$\$ Humko Industrene R \$\$ Hydrofol Acid 150 \$\$ Hystrene S-97 \$\$ Hystrene T-70 S

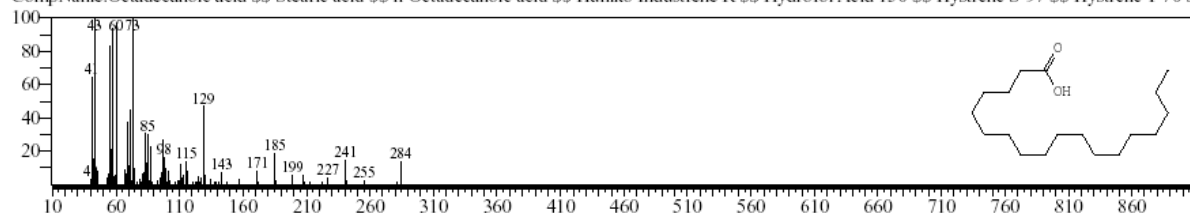

Hit#:3 Entry:169171 Library:NIST11.lib

SI:83 Formula:C22H44O4 CAS:106-11-6 MolWeight:372 RetIndex:2694

CompName:Octadecanoic acid, 2-(2-hydroxyethoxy)ethyl ester \$\$ Aqua Cera \$\$ Atlas G 2146 \$\$ Cerasynt \$\$ Cerasynt Special \$\$ Clindrol SDG \$\$ Diethyl

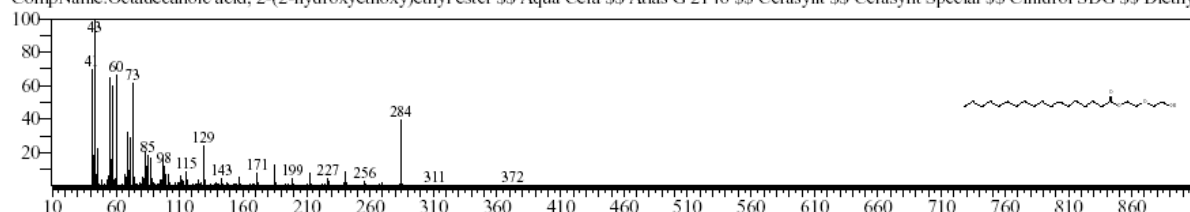

Hit#:4 Entry:128151 Library:NIST11.lib

SI:82 Formula:C20H40O2 CAS:506-30-9 MolWeight:312 RetIndex:2366

CompName:Eicosanoic acid \$\$ Arachidic acid \$\$ Arachidic acid \$\$ Icosanoic acid \$\$ n-Eicosanoic acid \$\$ Arachidic acid (synthetic) \$\$

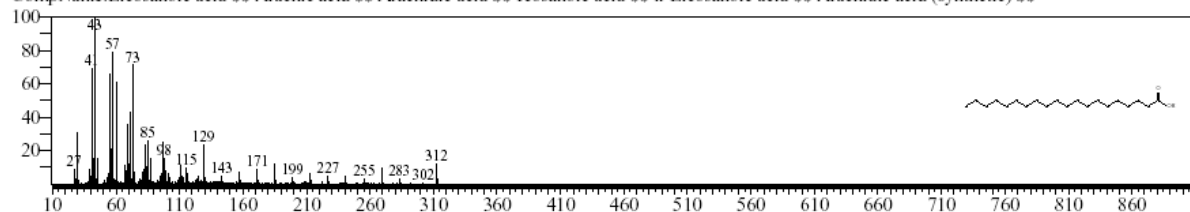

Hit#:5 Entry:25169 Library:NIST11s.lib

SI:82 Formula:C18H36O2 CAS:57-11-4 MolWeight:284 RetIndex:2167

CompName:Octadecanoic acid \$\$ Stearic acid \$\$ n-Octadecanoic acid \$\$ Humko Industrene R \$\$ Hydrofol Acid 150 \$\$ Hystrene S-97 \$\$ Hystrene T-70 S

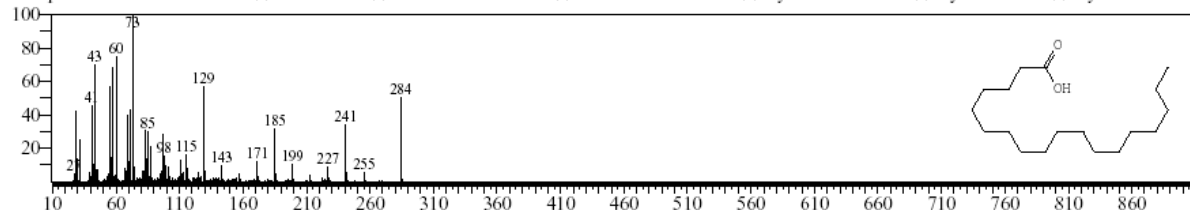

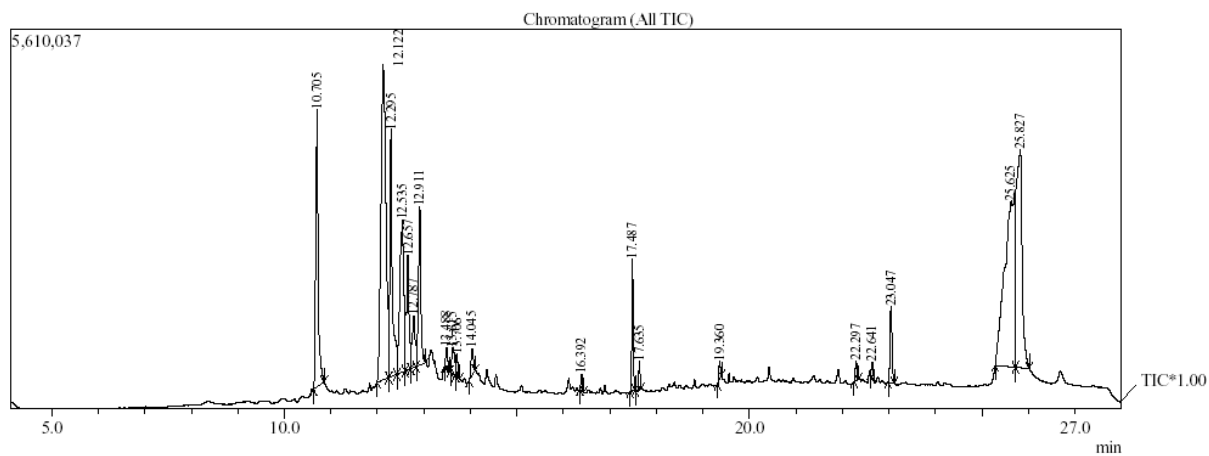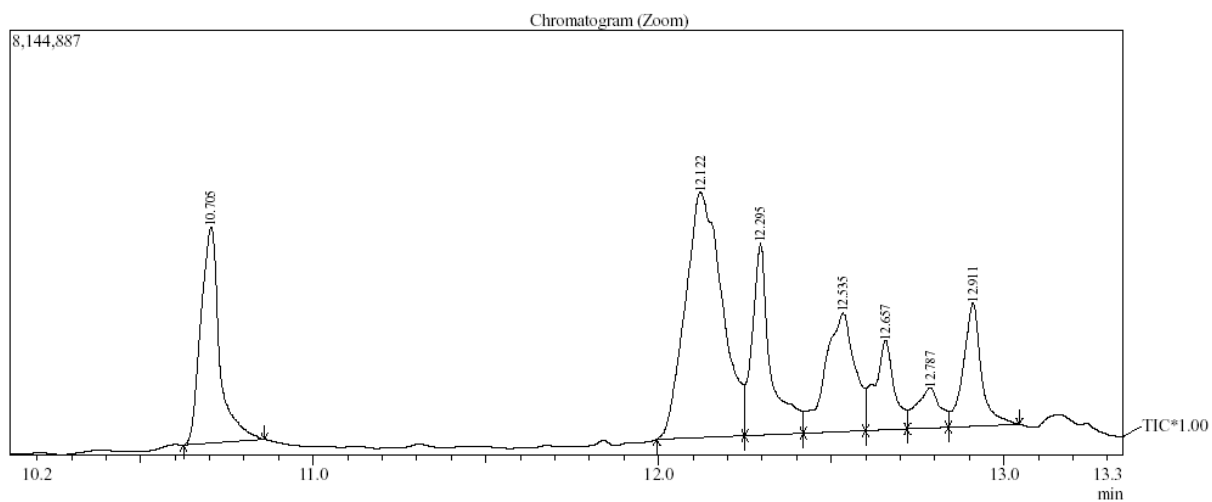

Spectrum

Line#:1 R.Time:12.550(Scan#:1691)  
 MassPeaks:828  
 RawMode:Single 12.550(1691) BasePeak:105.05(201169)  
 BG Mode:None Group 1 - Event 1 Scan

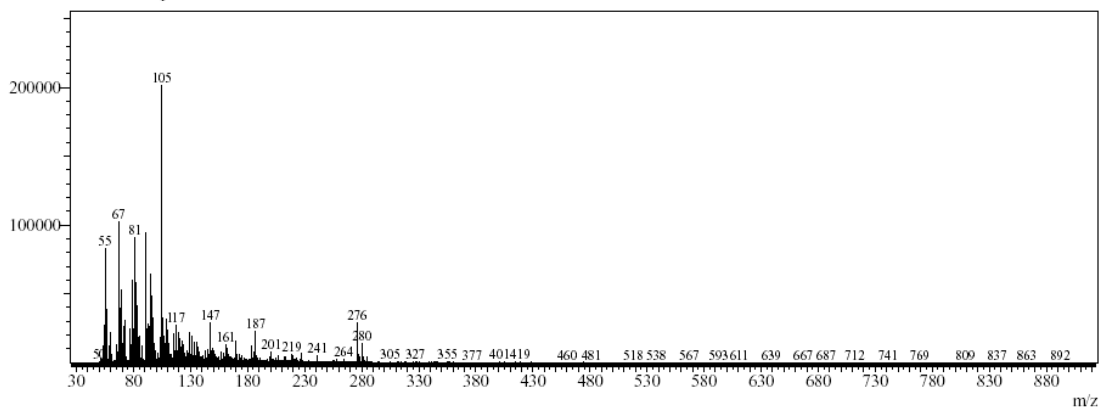



## Library Search

&lt;&lt; Target &gt;&gt;

Line#1 RTime:12.550(Scan#:1691) MassPeaks:828

RawMode:Single 12.550(1691) BasePeak:105.05(10000)

BG Mode:None Group 1 - Event 1 Scan

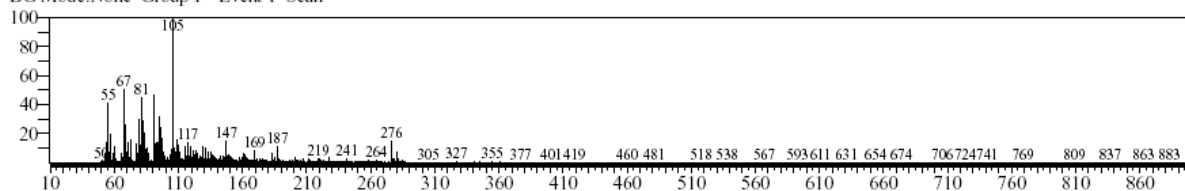

Hit#1 Entry:194711 Library:NIST11.lib

SI:78 Formula:C28H40O4 CAS:56700-76-6 MolWeight:440 RetIndex:3274

CompName:9,12,15-Octadecatrienoic acid, 2-phenyl-1,3-dioxan-5-yl ester \$\$ 2-Phenyl-1,3-dioxan-5-yl 9,12,15-octadecatrienoate \$\$

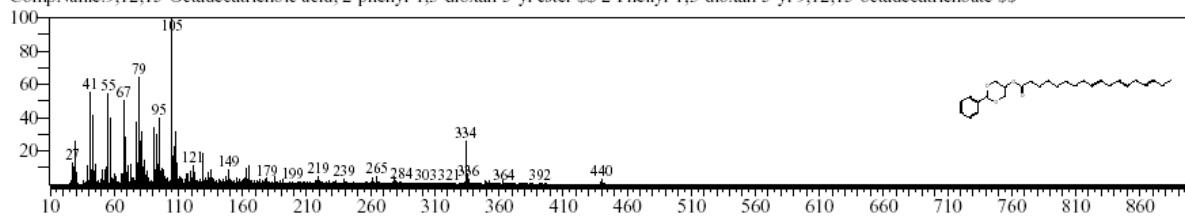

Hit#2 Entry:120338 Library:NIST11.lib

SI:77 Formula:C20H30O2 CAS:10417-94-4 MolWeight:302 RetIndex:2406

CompName:cis-5,8,11,14,17-Eicosapentaenoic acid \$\$ Eicosapentaenoic acid \$\$ (all-Z)-5,8,11,14,17-Eicosapentaenoic acid \$\$ EPA \$\$ Timnodonic acid \$\$

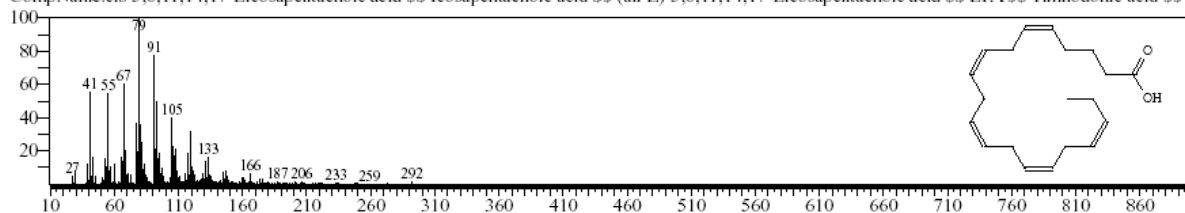

Hit#3 Entry:26468 Library:NIST11s.lib

SI:76 Formula:C20H34O2 CAS:1783-84-2 MolWeight:306 RetIndex:2390

CompName:8,11,14-Eicosatrienoic acid, (Z,Z,Z)- \$\$ cis-8,11,14-Eicosatrienoic Acid \$\$ Dihomo- $\gamma$ -linolenic acid \$\$ (8E,11E,14E)-8,11,14-Icosatrien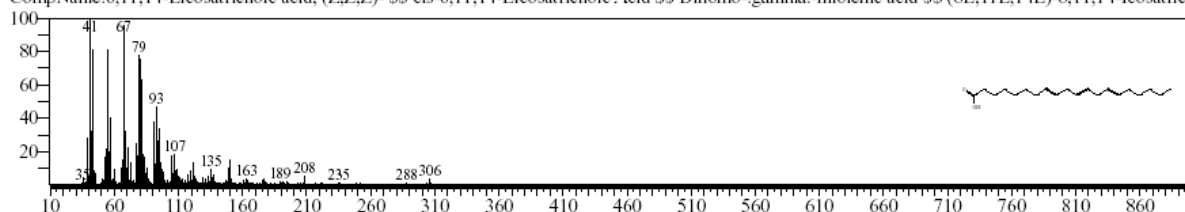

Hit#4 Entry:90502 Library:NIST11.lib

SI:76 Formula:C18H32O CAS:56554-35-9 MolWeight:264 RetIndex:1997

CompName:9,17-Octadecadienal, (Z)- \$\$ (9Z)-9,17-Octadecadienal # \$\$

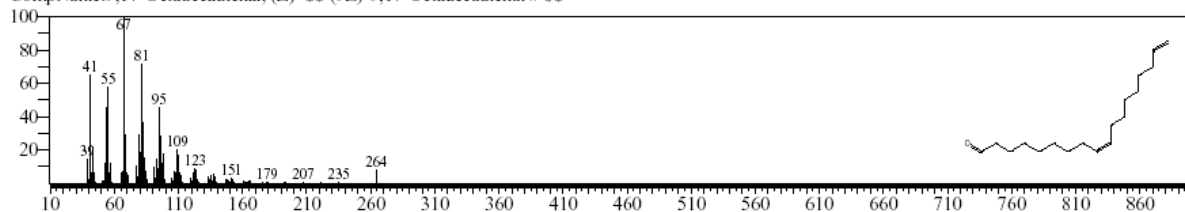

Hit#5 Entry:14066 Library:NIST11s.lib

SI:75 Formula:C12H18O CAS:943-93-1 MolWeight:178 RetIndex:1414

CompName:1,2-Epoxy-5,9-cyclododecadiene \$\$ 13-Oxabicyclo[10.1.0]trideca-4,8-diene \$\$

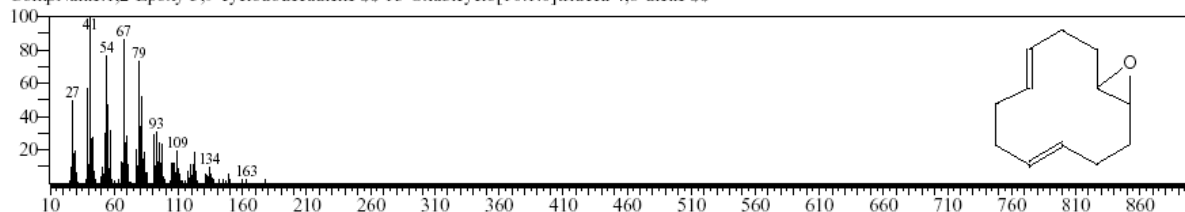

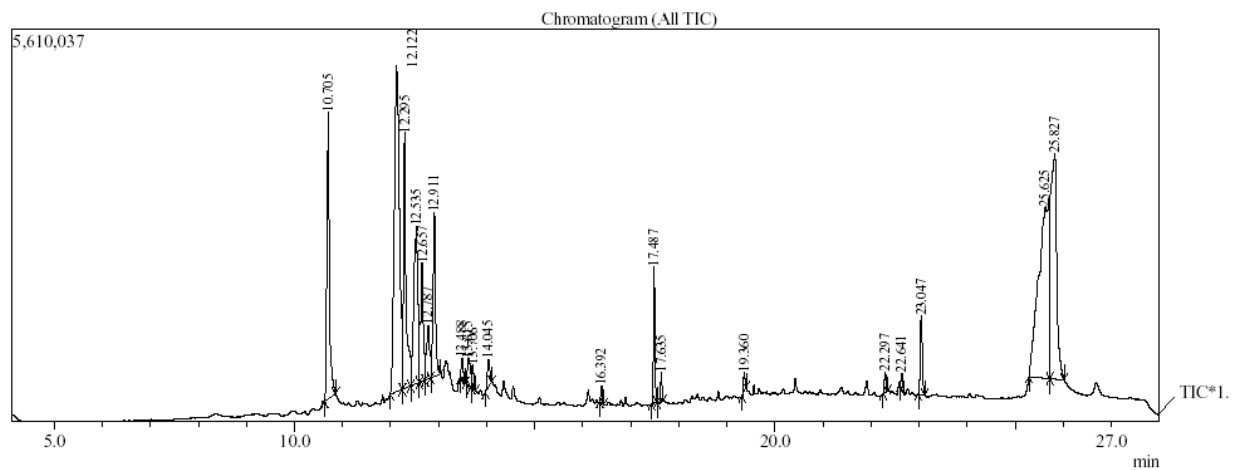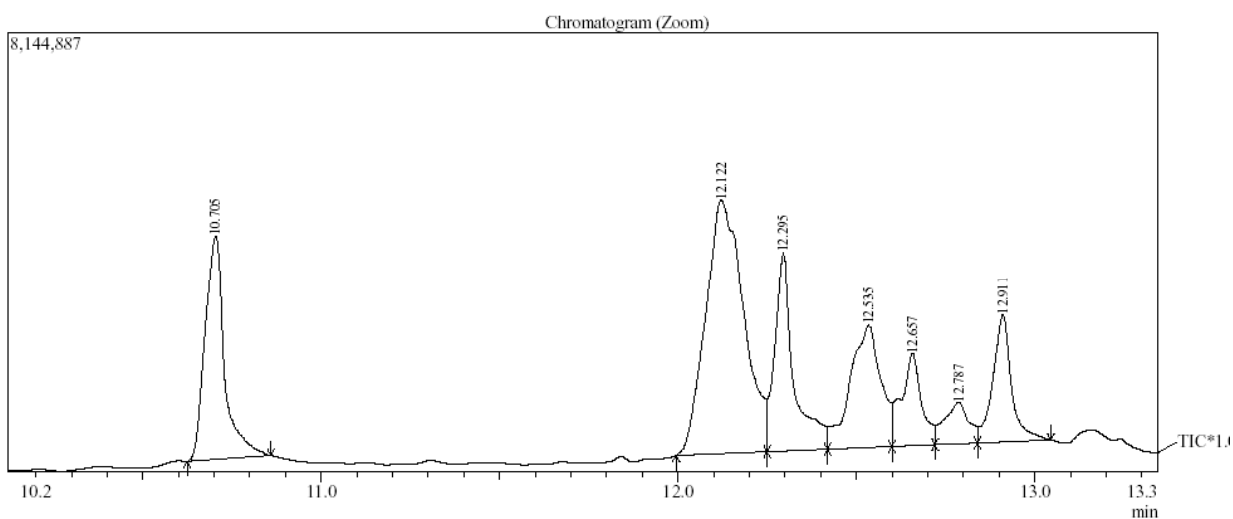

Spectrum

Line#:1 R.Time:12.655(Scan#:1712)  
 MassPeaks:816  
 RawMode:Single 12.655(1712) BasePeak:105.05(231915)  
 BG Mode:None Group 1 - Event 1 Scan

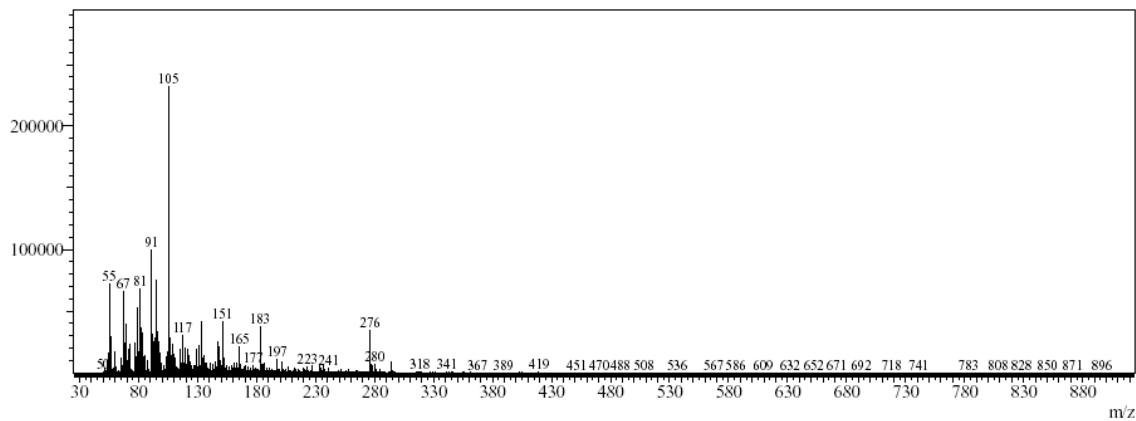

## Library Search

&lt;&lt; Target &gt;&gt;

Line#:1 R.Time:12.655(Scan#:1712) MassPeaks:816  
RawMode:Single 12.655(1712) BasePeak:105.05(10000)  
BG Mode:None Group 1 - Event 1 Scan

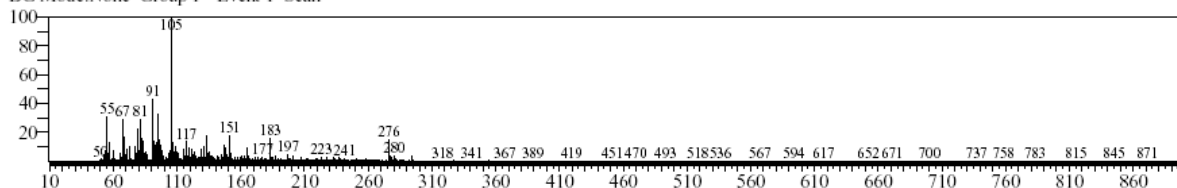

Hit#:1 Entry:194711 Library:NIST11.lib

SI:77 Formula:C28H40O4 CAS:56700-76-6 MolWeight:440 RetIndex:3274

CompName:9,12,15-Octadecatrienoic acid, 2-phenyl-1,3-dioxan-5-yl ester \$ 2-Phenyl-1,3-dioxan-5-yl 9,12,15-octadecatrienoate \$

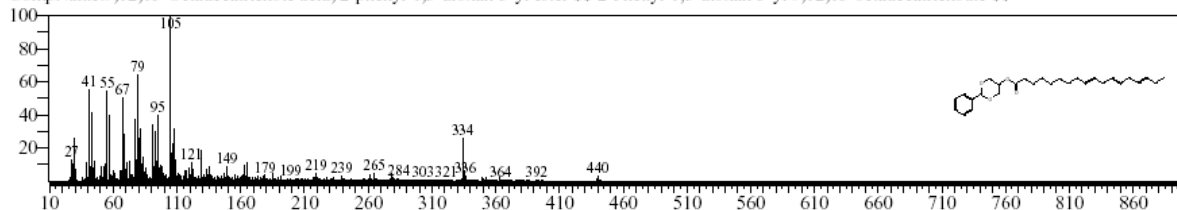

Hit#:2 Entry:120338 Library:NIST11.lib

SI:74 Formula:C20H30O2 CAS:10417-94-4 MolWeight:302 RetIndex:2406

CompName:cis-5,8,11,14,17-Eicosapentaenoic acid \$ Icosapentaenoic acid \$ (all-Z)-5,8,11,14,17-Eicosapentaenoic acid \$ EPA \$ Timnodonic acid \$

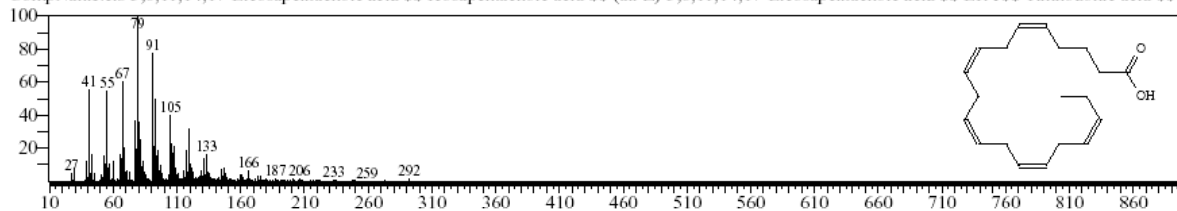

Hit#:3 Entry:121879 Library:NIST11.lib

SI:74 Formula:C20H32O2 CAS:506-32-1 MolWeight:304 RetIndex:2398

CompName:Arachidonic acid \$ 5,8,11,14-Eicosatetraenoic acid, (all-Z)- \$ Arachidonate \$ (all-Z)-5,8,11,14-Eicosatetraenoic acid \$ (5Z,8Z,11Z,14Z)-5,

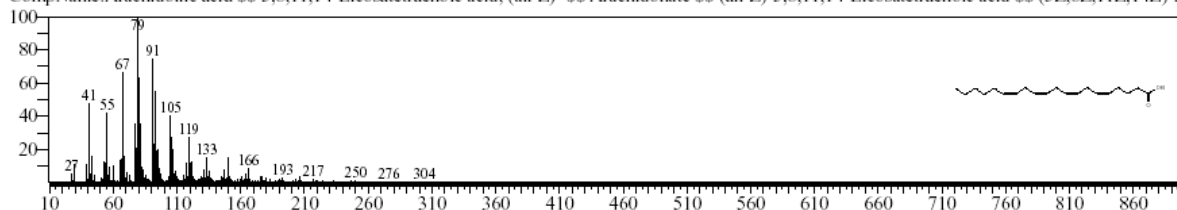

Hit#:4 Entry:89045 Library:NIST11.lib

SI:73 Formula:C19H34 CAS:0-00-0 MolWeight:262 RetIndex:1934

CompName:Z,Z,Z-4,6,9-Nonadecatriene \$ (4Z,6Z,9Z)-4,6,9-Nonadecatriene # \$

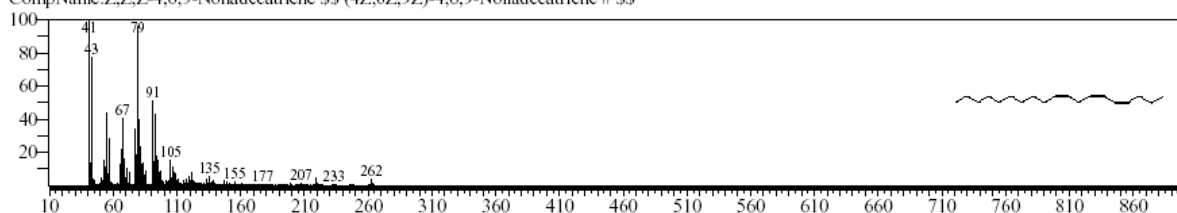

Hit#:5 Entry:132831 Library:NIST11.lib

SI:72 Formula:C21H34O2 CAS:0-00-0 MolWeight:318 RetIndex:2309

CompName:Methyl eicos-8,11-dien-14-ynoate

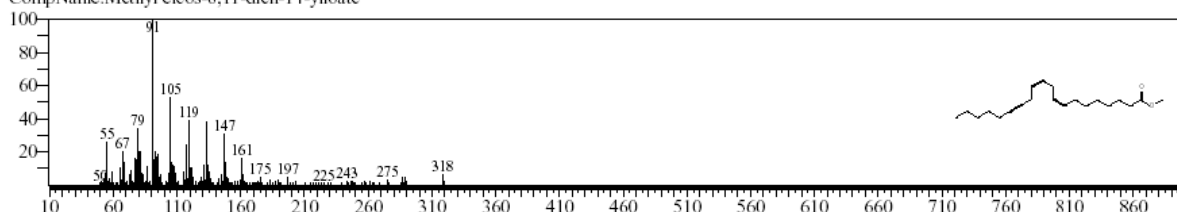

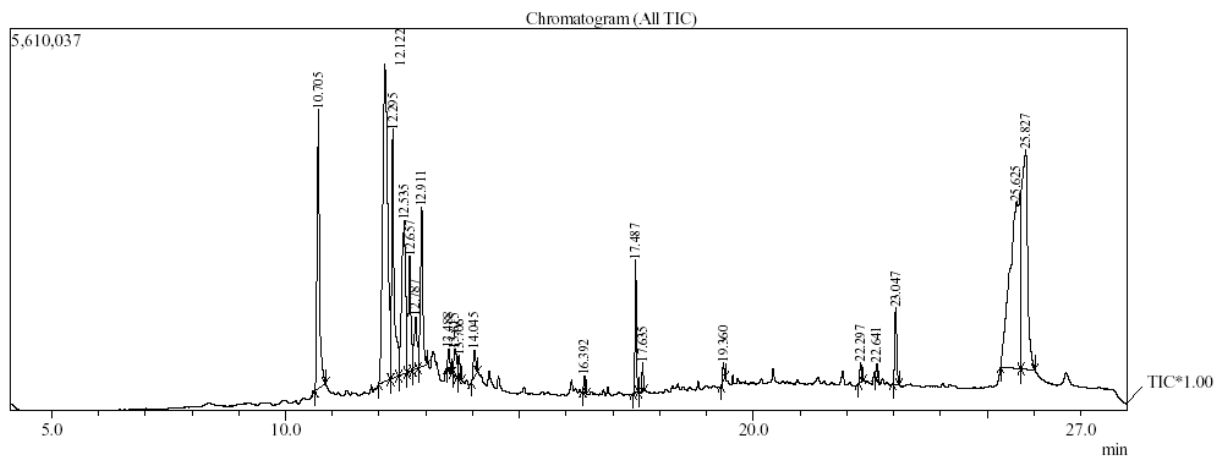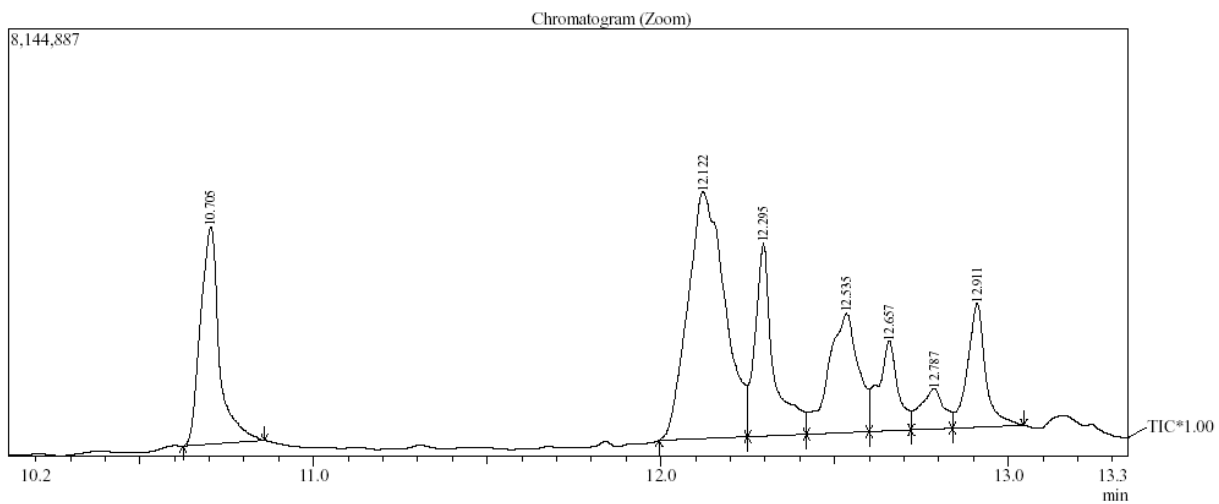

Spectrum

Line#:1 R.Time:12.905(Scan#:1762)  
 MassPeaks:805  
 RawMode:Single 12.905(1762) BasePeak:67.05(215125)  
 BG Mode:None Group 1 - Event 1 Scan

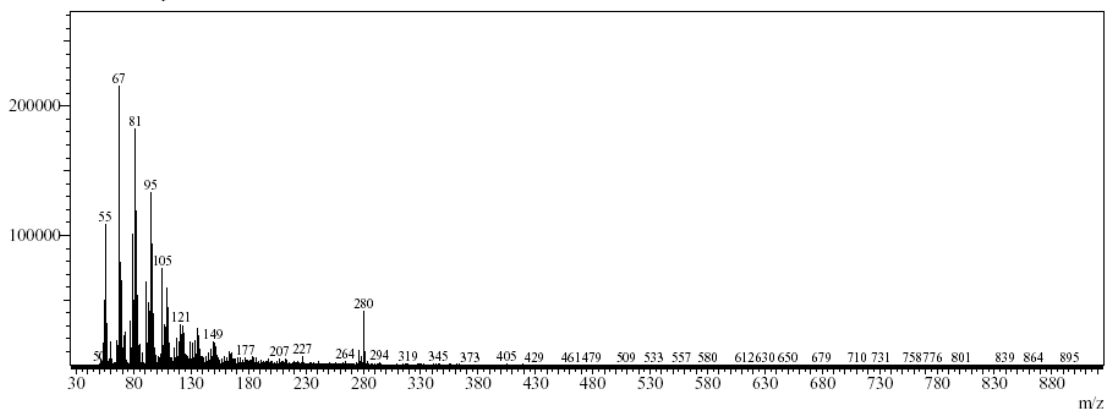

## Library Search

&lt;&lt; Target &gt;&gt;

Line#:1 R.Time:12.905(Scan#:1762) MassPeaks:805

RawMode:Single 12.905(1762) BasePeak:67.05(10000)

BG Mode:None Group 1 - Event 1 Scan

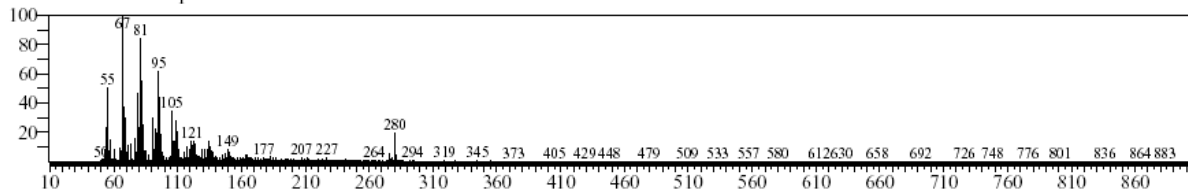

Hit#1 Entry:24904 Library:NIST11s.lib

SI:90 Formula:C18H32O2 CAS:60-33-3 MolWeight:280 RetIndex:2183

CompName:9,12-Octadecadienoic acid (Z,Z)- \$\$ cis-9,cis-12-Octadecadienoic acid \$\$ cis,cis-Linoleic acid \$\$ Grape seed oil \$\$ Linoleic acid \$

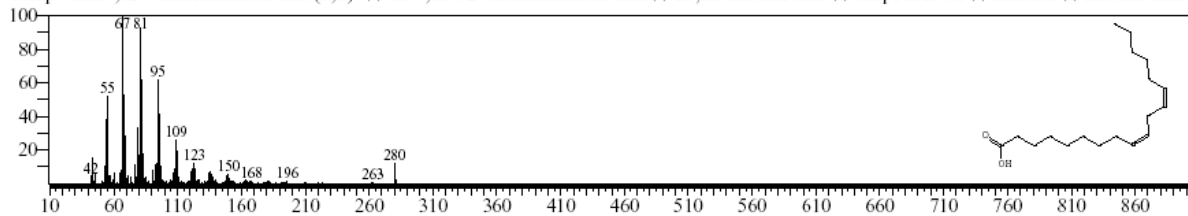

Hit#2 Entry:24903 Library:NIST11s.lib

SI:89 Formula:C18H32O2 CAS:60-33-3 MolWeight:280 RetIndex:2183

CompName:9,12-Octadecadienoic acid (Z,Z)- \$\$ cis-9,cis-12-Octadecadienoic acid \$\$ cis,cis-Linoleic acid \$\$ Grape seed oil \$\$ Linoleic acid \$

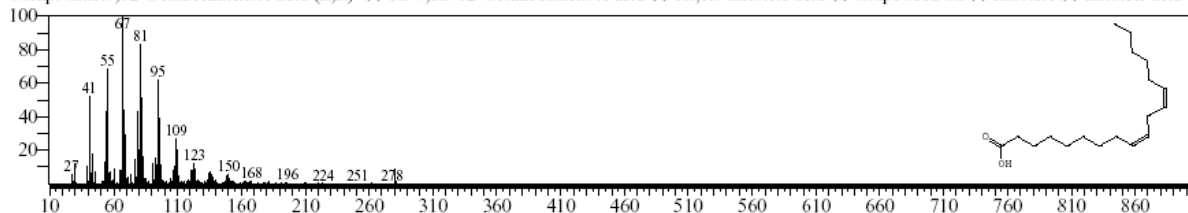

Hit#3 Entry:126507 Library:NIST11.lib

SI:87 Formula:C20H38O2 CAS:17367-08-7 MolWeight:310 RetIndex:2344

CompName:Ethanol, 2-(9,12-octadecadienyloxy)-, (Z,Z)- \$\$ 2-cis,cis-9,12-Octadecadienyloxyethanol \$\$ 2-[(9Z,12Z)-9,12-Octadecadienyloxy]ethanol # \$\$

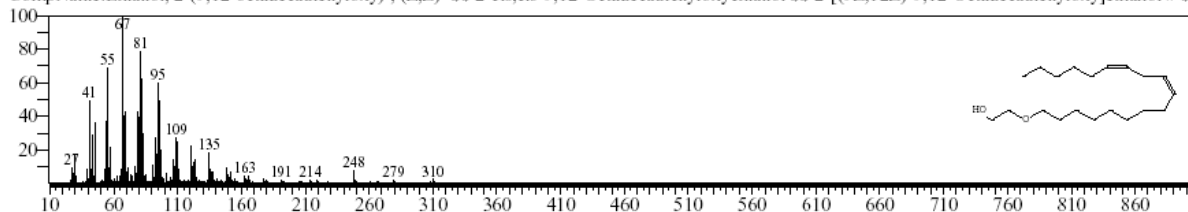

Hit#4 Entry:102805 Library:NIST11.lib

SI:86 Formula:C18H32O2 CAS:0-00-0 MolWeight:280 RetIndex:1994

CompName:Z,Z-11,13-Hexadecadien-1-ol acetate \$\$ (11Z,13Z)-11,13-Hexadecadienyl acetate # \$\$

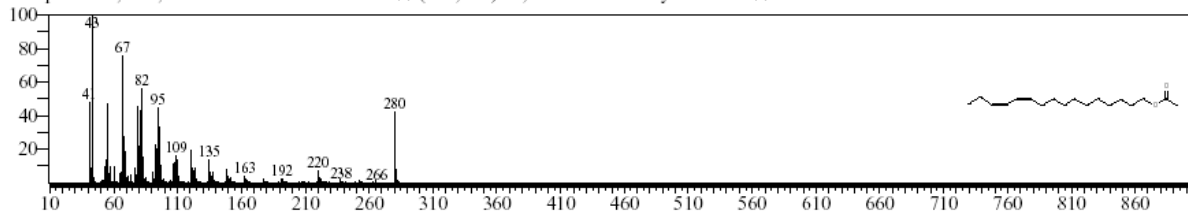

Hit#5 Entry:102804 Library:NIST11.lib

SI:86 Formula:C18H32O2 CAS:0-00-0 MolWeight:280 RetIndex:1994

CompName:Z,Z-10,12-Hexadecadien-1-ol acetate \$\$ (10Z,12Z)-10,12-Hexadecadienyl acetate # \$\$

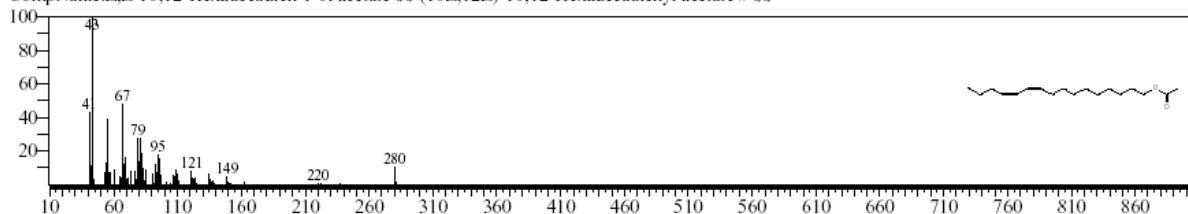

**Figures S13.** HRMS Details of instruments used for analysis followed by analyzed data from next page

## Liquid Chromatography Mass Spectrometer

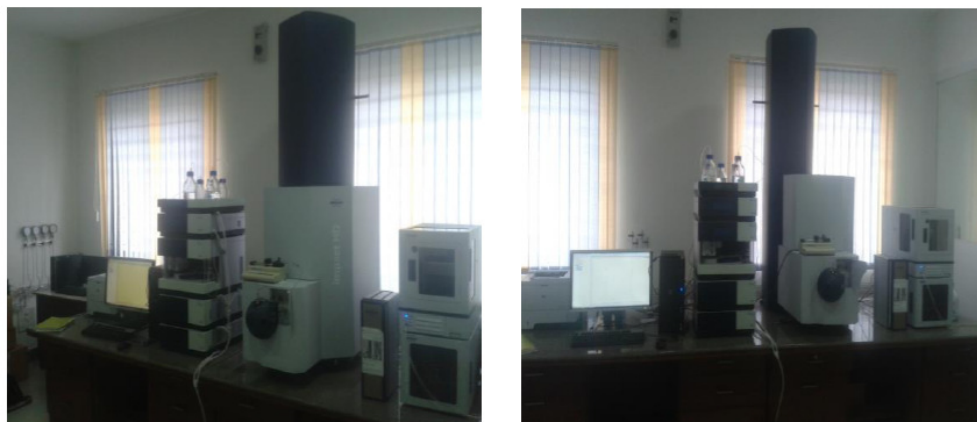

### FACILITY:

HR-MS

HR-MS/MS

U-HPLC-MS

U-HPLC-MS/MS

(Mode for MSMS: Auto MSMS, MRM)

### MODEL AND SPECIFICATIONS:

#### U-HPLC:

Thermo scientific

Dionex Ultimate 3000

Detector: DAD (Diode Array Detector)

#### Mass Spectrometer:

Bruker Daltonik GmbH, Germany

Impact II UHR-ToF Mass Spectrometer System

(Impact II Ultra-High-Resolution Time-of-Flight Mass Spectrometer)

---

**Savitribai Phule Pune University - Central Instrumentation Facility**

---

**Analysis Info**

Analysis Name D:\Data\Dr. ANKAMWAR\ID\_RE8\_01\_1717.d  
Method dlc\_mz1000\_10min.m  
Sample Name ID  
Comment

Acquisition Date 11/26/2015 12:41:48 PM

Operator CIF  
Instrument impact HD 1819696.00184

**Acquisition Parameter**

|             |          |                      |          |                  |           |
|-------------|----------|----------------------|----------|------------------|-----------|
| Source Type | ESI      | Ion Polarity         | Positive | Set Nebulizer    | 0.3 Bar   |
| Focus       | Active   | Set Capillary        | 3000 V   | Set Dry Heater   | 200 °C    |
| Scan Begin  | 50 m/z   | Set End Plate Offset | -500 V   | Set Dry Gas      | 4.0 l/min |
| Scan End    | 1200 m/z | Set Charging Voltage | 2000 V   | Set Divert Valve | Waste     |
|             |          | Set Corona           | 0 nA     | Set APCI Heater  | 0 °C      |

---

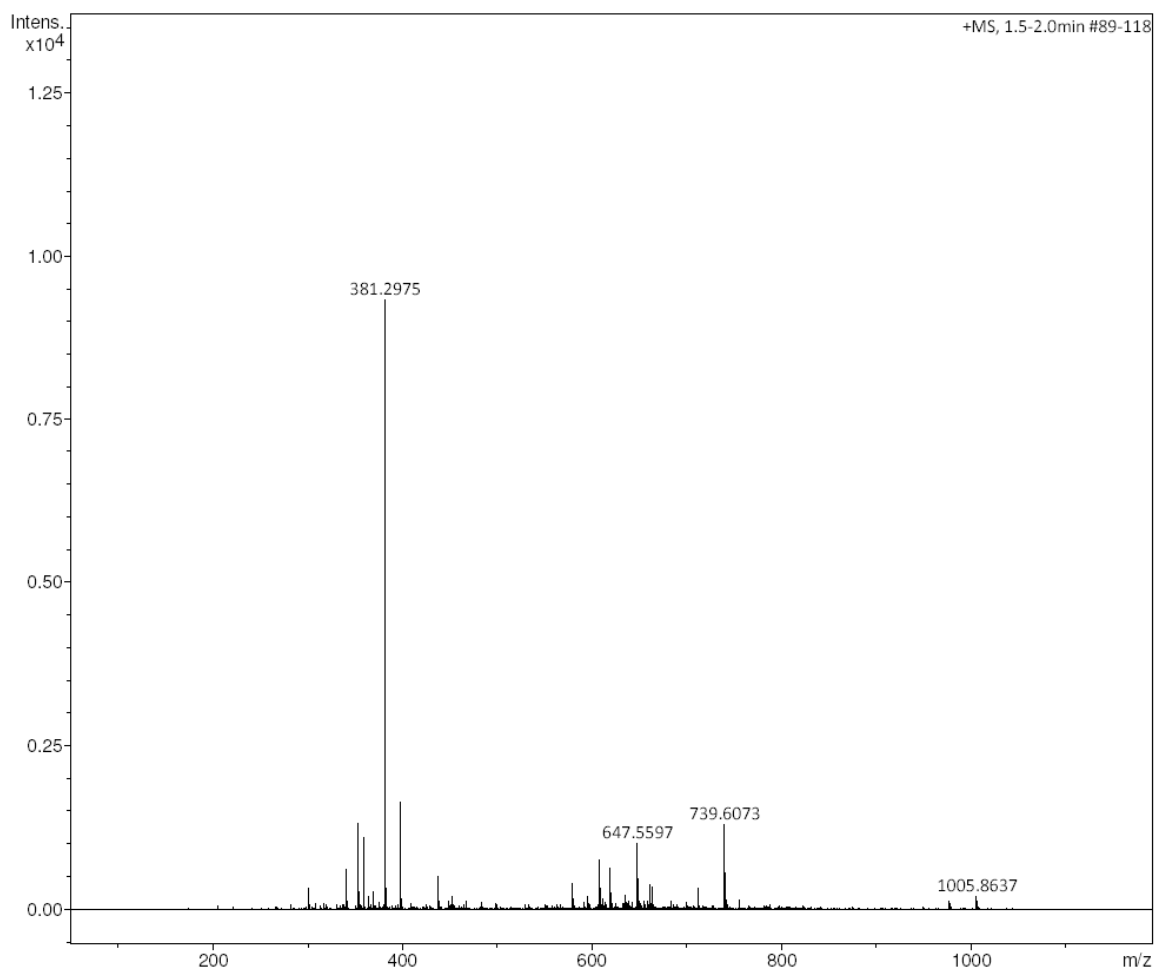

ID\_RE8\_01\_1717.d

Bruker Compass DataAnalysis 4.2

printed: 11/26/2015 1:36:25 PM

by: CIF

Page 1 of 1

---

**Savitribai Phule Pune University - Central Instrumentation Facility**

---

**Analysis Info**

Analysis Name D:\Data\Dr. ANKAMWAR\ID\_RE8\_01\_1718.d  
Method dlc-ms2000mz\_10min.m  
Sample Name ID  
Comment

Acquisition Date 11/26/2015 12:52:28 PM

Operator CIF  
Instrument impact HD 1819696.00184

**Acquisition Parameter**

|             |          |                      |          |                  |           |
|-------------|----------|----------------------|----------|------------------|-----------|
| Source Type | ESI      | Ion Polarity         | Positive | Set Nebulizer    | 0.3 Bar   |
| Focus       | Active   | Set Capillary        | 4000 V   | Set Dry Heater   | 200 °C    |
| Scan Begin  | 50 m/z   | Set End Plate Offset | -500 V   | Set Dry Gas      | 4.0 l/min |
| Scan End    | 2000 m/z | Set Charging Voltage | 2000 V   | Set Divert Valve | Waste     |
|             |          | Set Corona           | 0 nA     | Set APCI Heater  | 0 °C      |

---

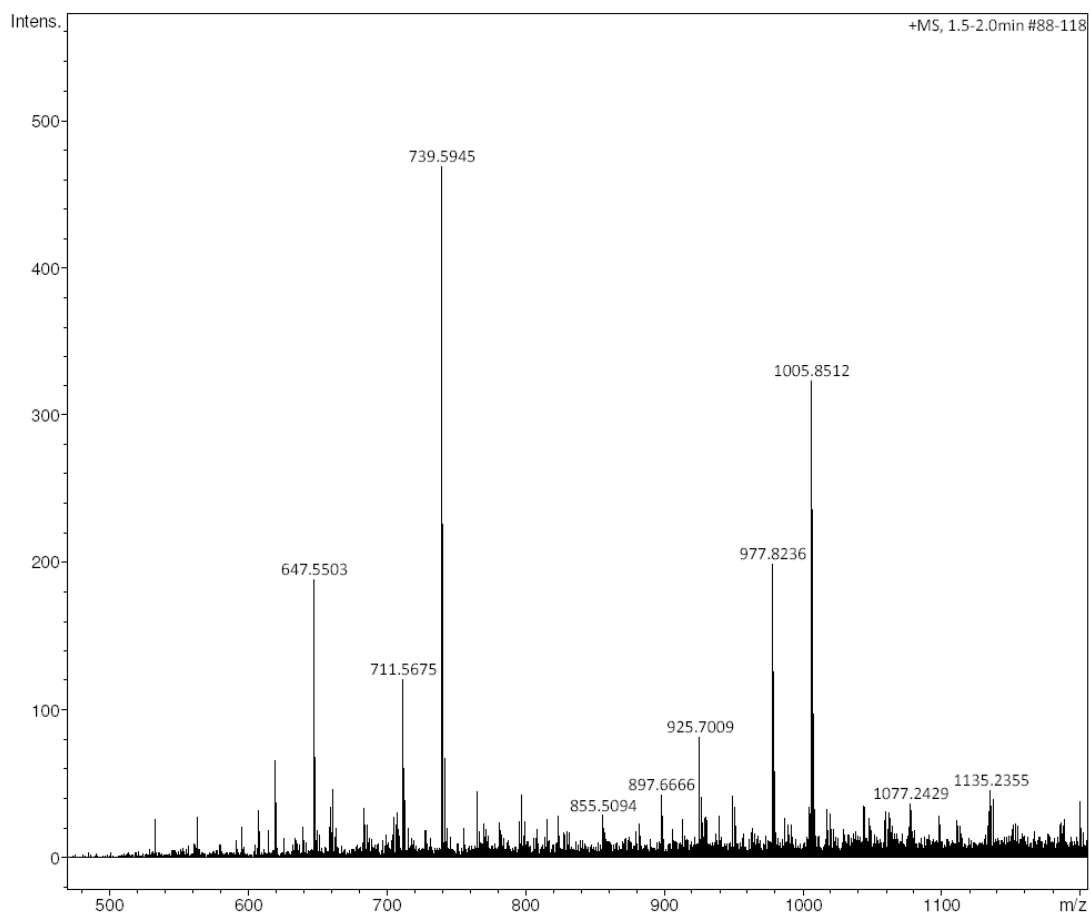

ID\_RE8\_01\_1718.d

Bruker Compass DataAnalysis 4.2

printed: 11/26/2015 1:40:29 PM

by: CIF

Page 1 of 1

---



---

**Savitribai Phule Pune University - Central Instrumentation Facility**

---

**Analysis Info**

Analysis Name D:\Data\Dr. ANKAMWAR\ID\_RE8\_01\_1718.d  
Method dlc-ms2000mz\_10min.m  
Sample Name ID  
Comment

Acquisition Date 11/26/2015 12:52:28 PM

Operator CIF  
Instrument impact HD 1819696.00184

**Acquisition Parameter**

|             |          |                      |          |                  |           |
|-------------|----------|----------------------|----------|------------------|-----------|
| Source Type | ESI      | Ion Polarity         | Positive | Set Nebulizer    | 0.3 Bar   |
| Focus       | Active   | Set Capillary        | 4000 V   | Set Dry Heater   | 200 °C    |
| Scan Begin  | 50 m/z   | Set End Plate Offset | -500 V   | Set Dry Gas      | 4.0 l/min |
| Scan End    | 2000 m/z | Set Charging Voltage | 2000 V   | Set Divert Valve | Waste     |
|             |          | Set Corona           | 0 nA     | Set APCI Heater  | 0 °C      |

---

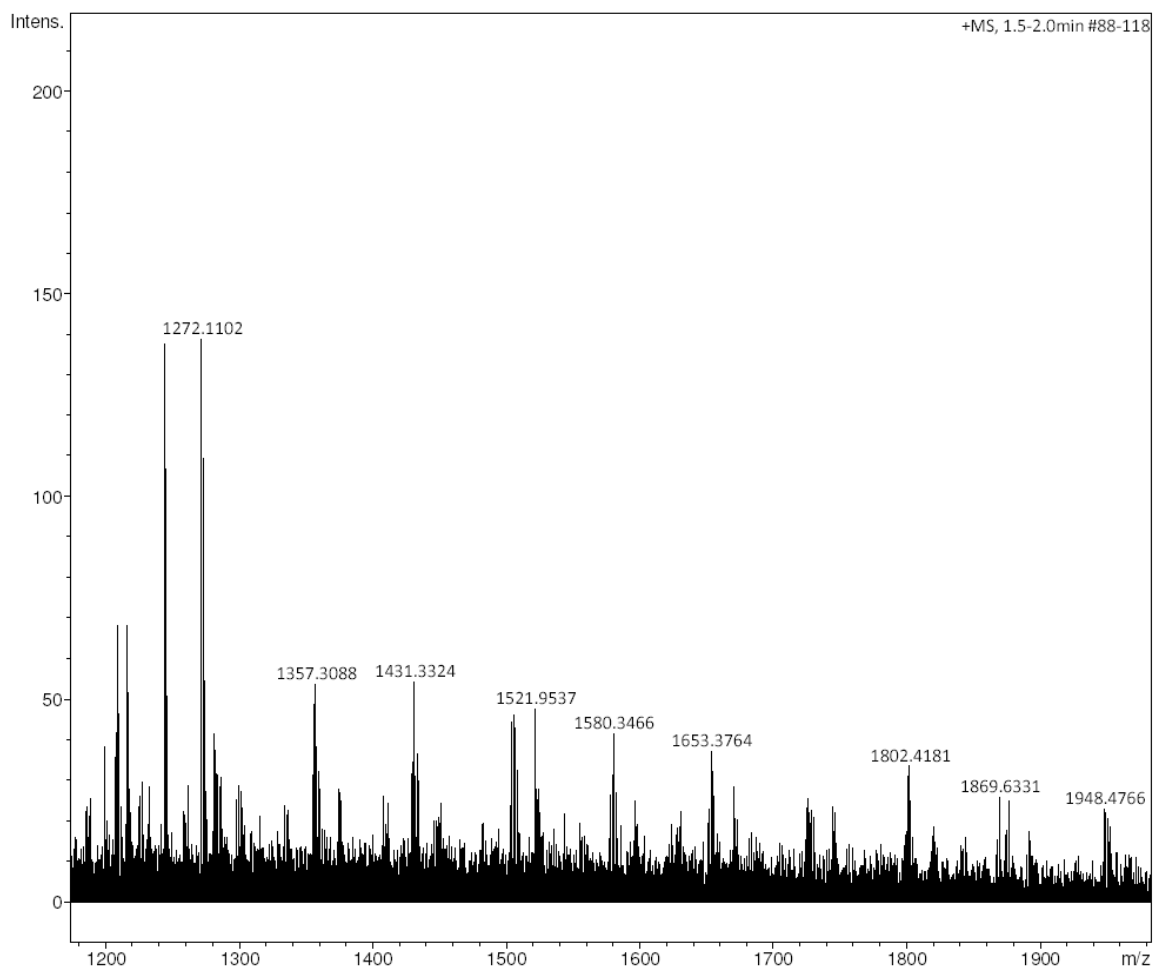

ID\_RE8\_01\_1718.d

Bruker Compass DataAnalysis 4.2

printed: 11/26/2015 1:40:53 PM

by: CIF

Page 1 of 1

---

---

Savitribai Phule Pune University - Central Instrumentation Facility

---

**Analysis Info**

Analysis Name D:\Data\Dr. ANKAMWAR\ID\_RE8\_01\_1717.d  
Method dlc\_mz1000\_10min.m  
Sample Name ID  
Comment

Acquisition Date 11/26/2015 12:41:48 PM

Operator CIF  
Instrument impact HD 1819696.00184

**Acquisition Parameter**

|             |          |                      |          |                  |           |
|-------------|----------|----------------------|----------|------------------|-----------|
| Source Type | ESI      | Ion Polarity         | Positive | Set Nebulizer    | 0.3 Bar   |
| Focus       | Active   | Set Capillary        | 3000 V   | Set Dry Heater   | 200 °C    |
| Scan Begin  | 50 m/z   | Set End Plate Offset | -500 V   | Set Dry Gas      | 4.0 l/min |
| Scan End    | 1200 m/z | Set Charging Voltage | 2000 V   | Set Divert Valve | Waste     |
|             |          | Set Corona           | 0 nA     | Set APCI Heater  | 0 °C      |

---

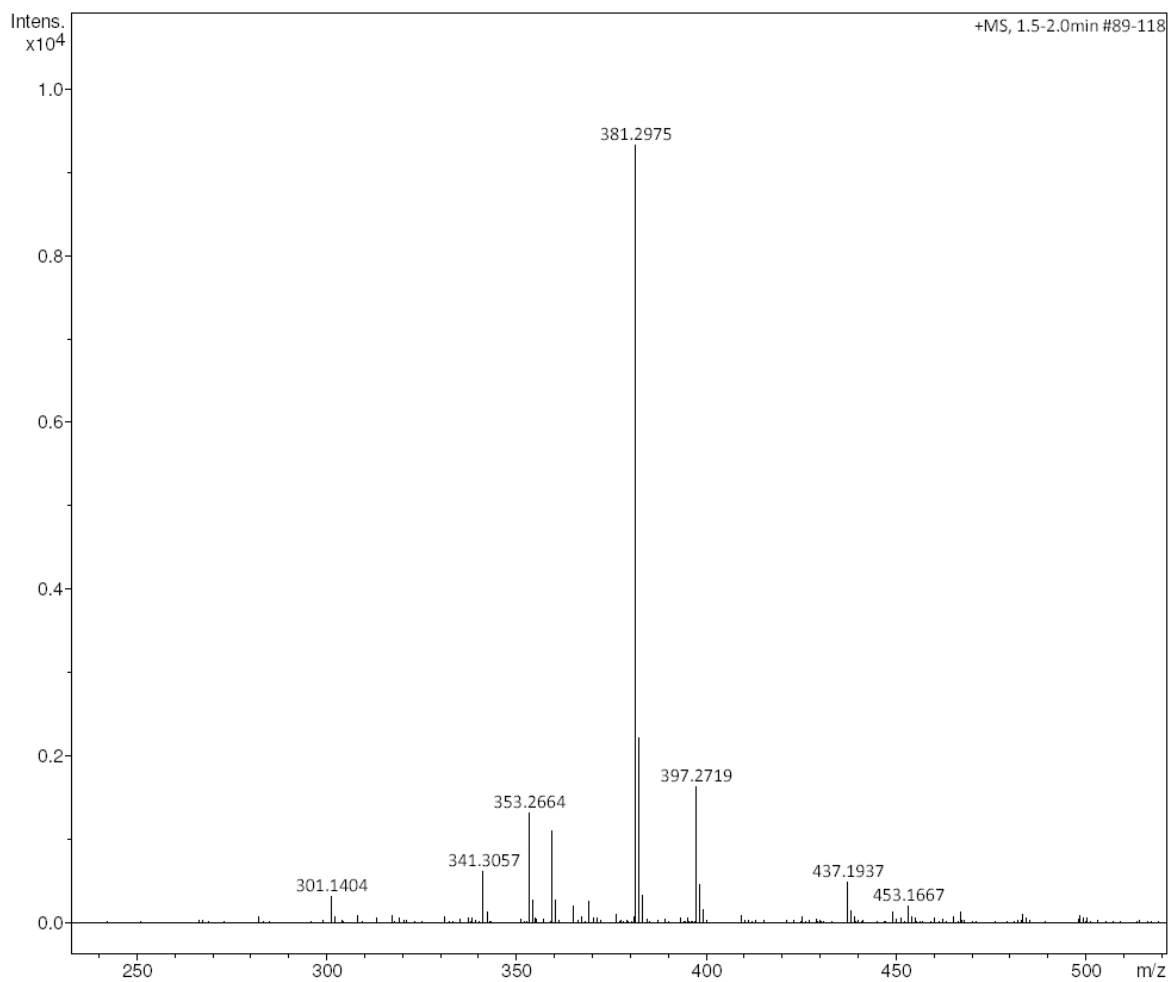

---

**Savitribai Phule Pune University - Central Instrumentation Facility**

---

**Analysis Info**

Analysis Name D:\Data\Dr. ANKAMWAR\ID\_RE8\_01\_1717.d  
Method dlc\_mz1000\_10min.m  
Sample Name ID  
Comment

Acquisition Date 11/26/2015 12:41:48 PM

Operator CIF  
Instrument impact HD 1819696.00184

**Acquisition Parameter**

|             |          |                      |          |                  |           |
|-------------|----------|----------------------|----------|------------------|-----------|
| Source Type | ESI      | Ion Polarity         | Positive | Set Nebulizer    | 0.3 Bar   |
| Focus       | Active   | Set Capillary        | 3000 V   | Set Dry Heater   | 200 °C    |
| Scan Begin  | 50 m/z   | Set End Plate Offset | -500 V   | Set Dry Gas      | 4.0 l/min |
| Scan End    | 1200 m/z | Set Charging Voltage | 2000 V   | Set Divert Valve | Waste     |
|             |          | Set Corona           | 0 nA     | Set APCI Heater  | 0 °C      |

---

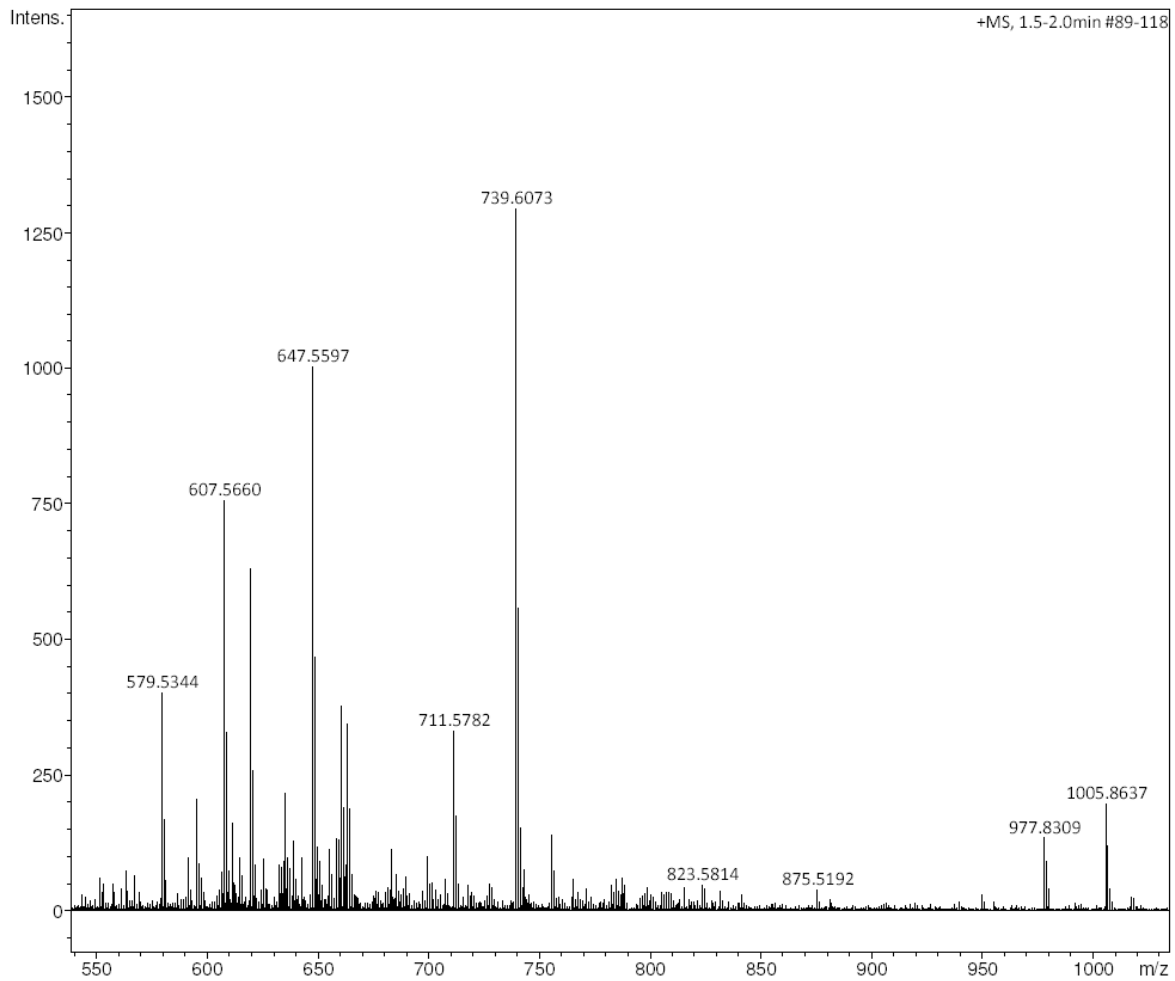

---

**Savitribai Phule Pune University - Central Instrumentation Facility**

---

**Analysis Info**

Analysis Name D:\Data\Dr. ANKAMWAR\ID\_RE8\_01\_1718.d  
Method dlc-ms2000mz\_10min.m  
Sample Name ID  
Comment

Acquisition Date 11/26/2015 12:52:28 PM

Operator CIF  
Instrument impact HD 1819696.00184

**Acquisition Parameter**

|             |          |                      |          |                  |           |
|-------------|----------|----------------------|----------|------------------|-----------|
| Source Type | ESI      | Ion Polarity         | Positive | Set Nebulizer    | 0.3 Bar   |
| Focus       | Active   | Set Capillary        | 4000 V   | Set Dry Heater   | 200 °C    |
| Scan Begin  | 50 m/z   | Set End Plate Offset | -500 V   | Set Dry Gas      | 4.0 l/min |
| Scan End    | 2000 m/z | Set Charging Voltage | 2000 V   | Set Divert Valve | Waste     |
|             |          | Set Corona           | 0 nA     | Set APCI Heater  | 0 °C      |

---

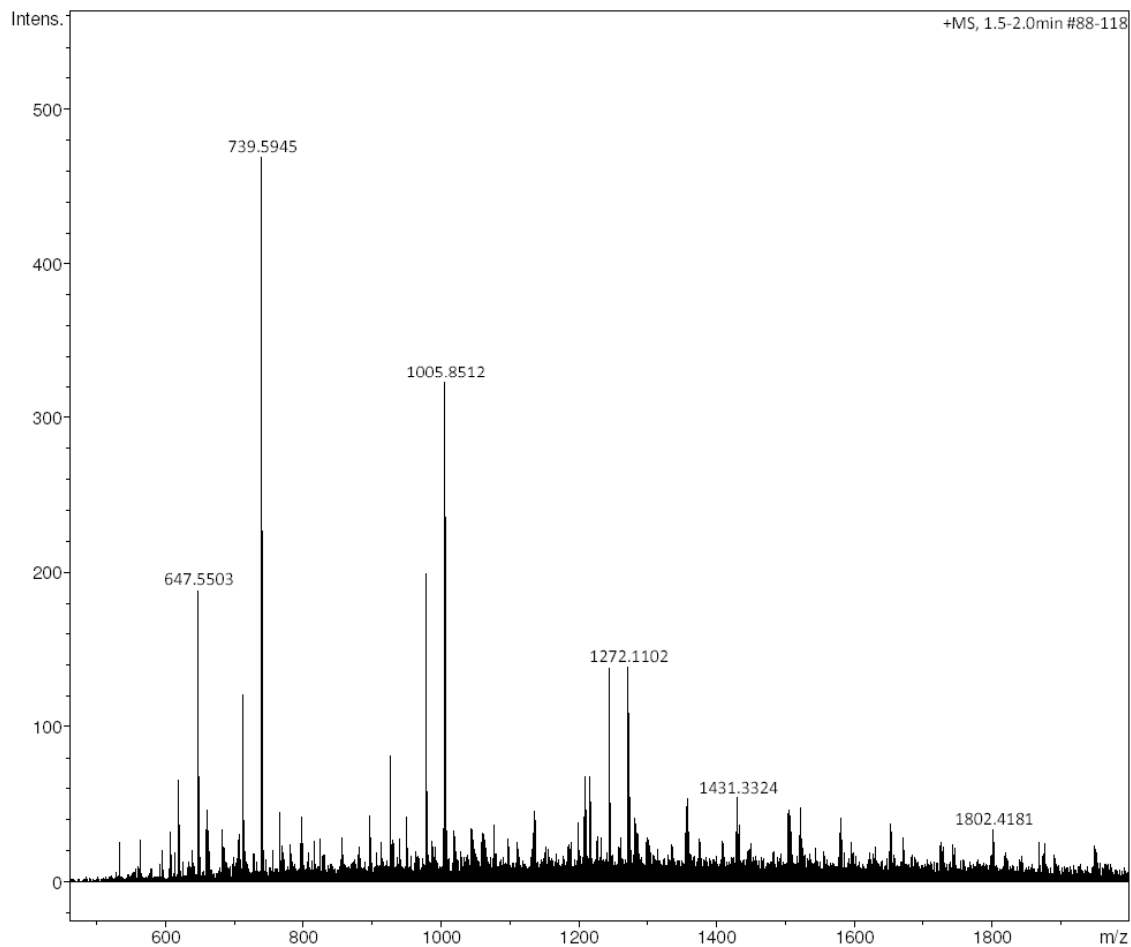

ID\_RE8\_01\_1718.d

Bruker Compass DataAnalysis 4.2

printed: 11/26/2015 1:39:59 PM

by: CIF

Page 1 of 1

**Figure S14.**  $^1\text{H}$  NMR of *Inonotus dryadeus* (Solvent: DMSO) Instrument: Bruker Ascend 400 MHz

Characteristics chemical shifts were observed in  $^1\text{H}$  NMR for alcohols (~1-3ppm) and phenols, amides (~3-7 ppm), however acid peaks didn't, hence  $^{13}\text{C}$  NMR was carried out.

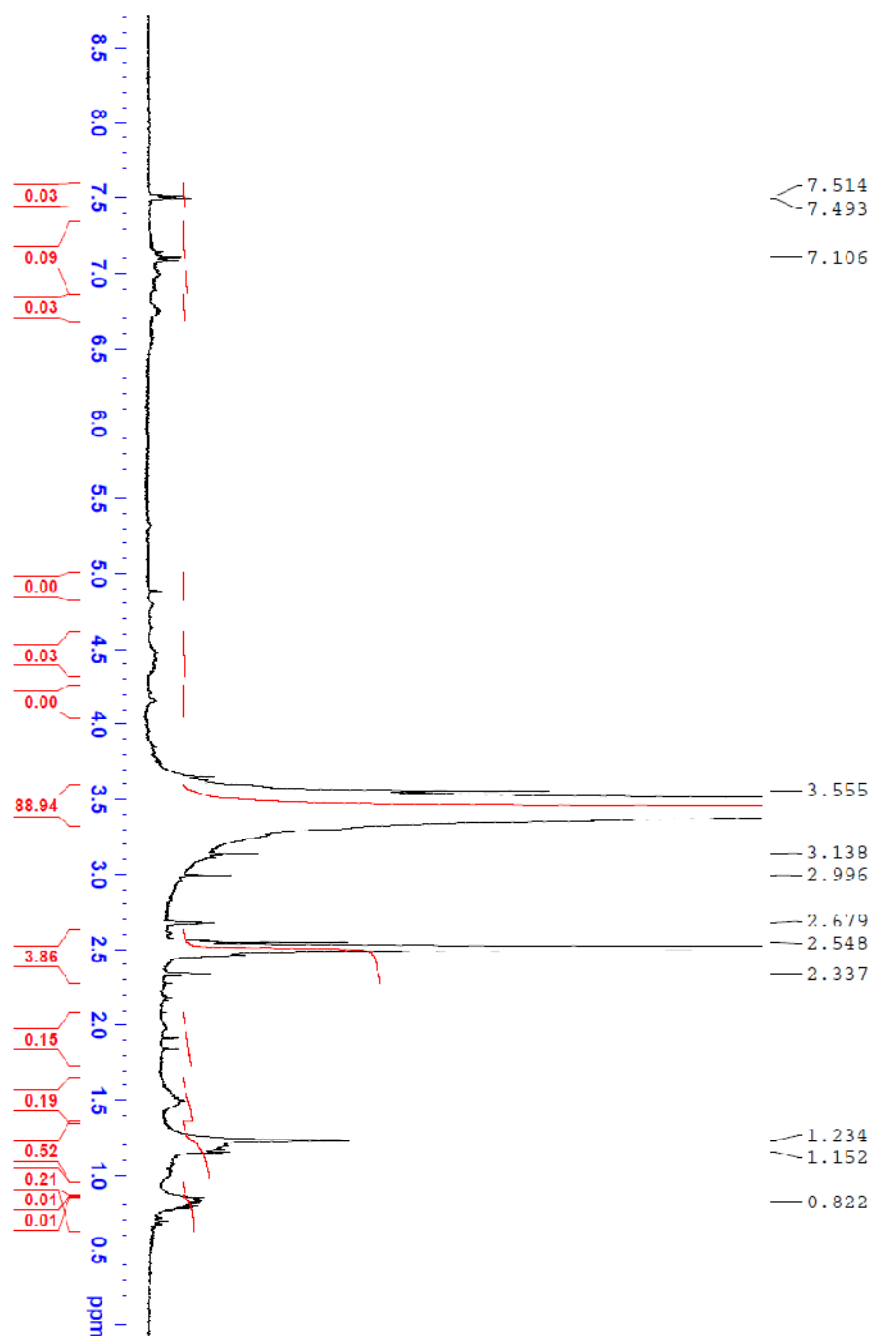

**Figure S15.**  $^{13}\text{C}$  NMR of *Inonotus dryadeus* (Solvent: DMSO) Instrument: Bruker Ascend 400 MHz

Characteristics chemical shifts were observed in  $^{13}\text{C}$  NMR for alcohols and amides (~45-75ppm)

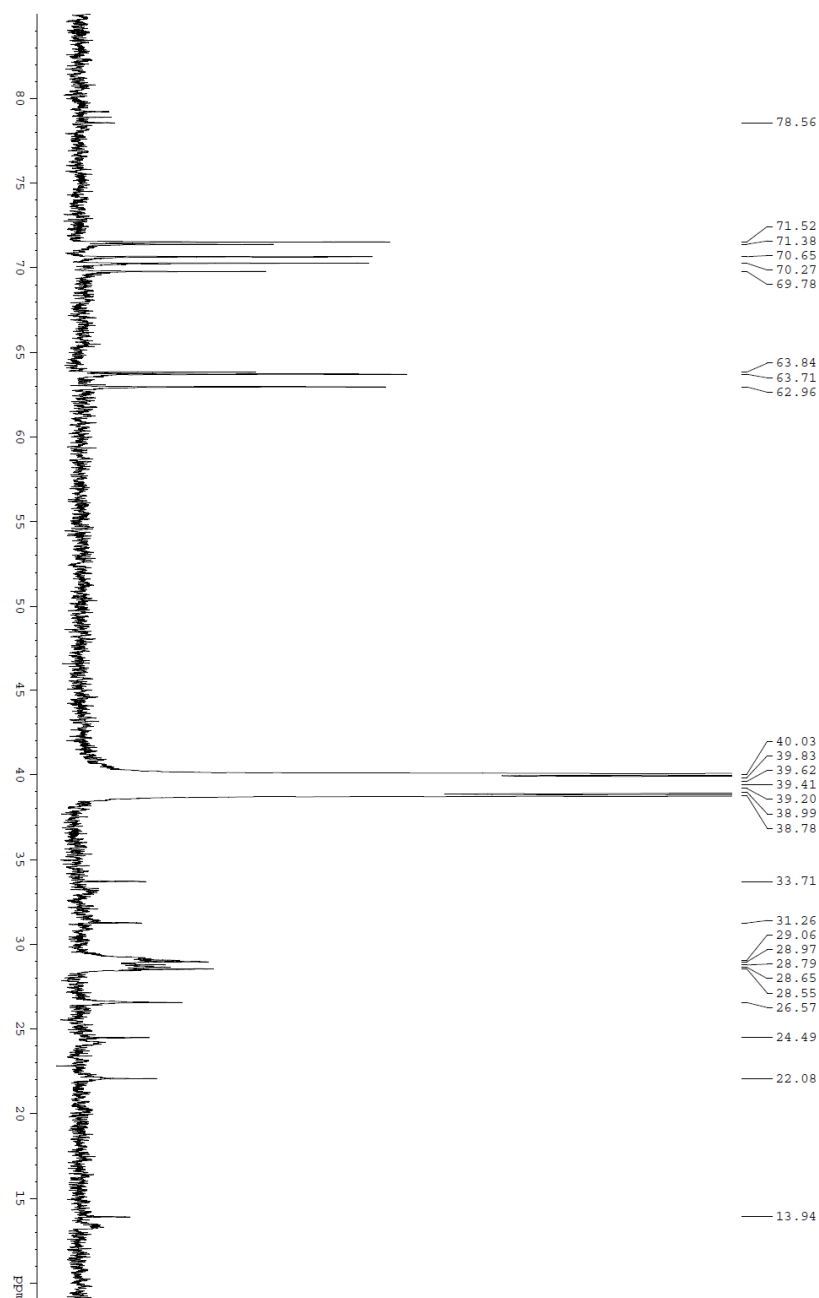

**Figure S16.**  $^{13}\text{C}$  NMR of *Inonotus dryadeus* (Solvent: DMSO) Expanded

Characteristics chemical shifts were observed in  $^{13}\text{C}$  NMR for Acids, carboxylic acid derivatives e.g. ester, amide, acid halide, acid anhydride (~160-190 ppm) and phenols (~148-160 ppm).

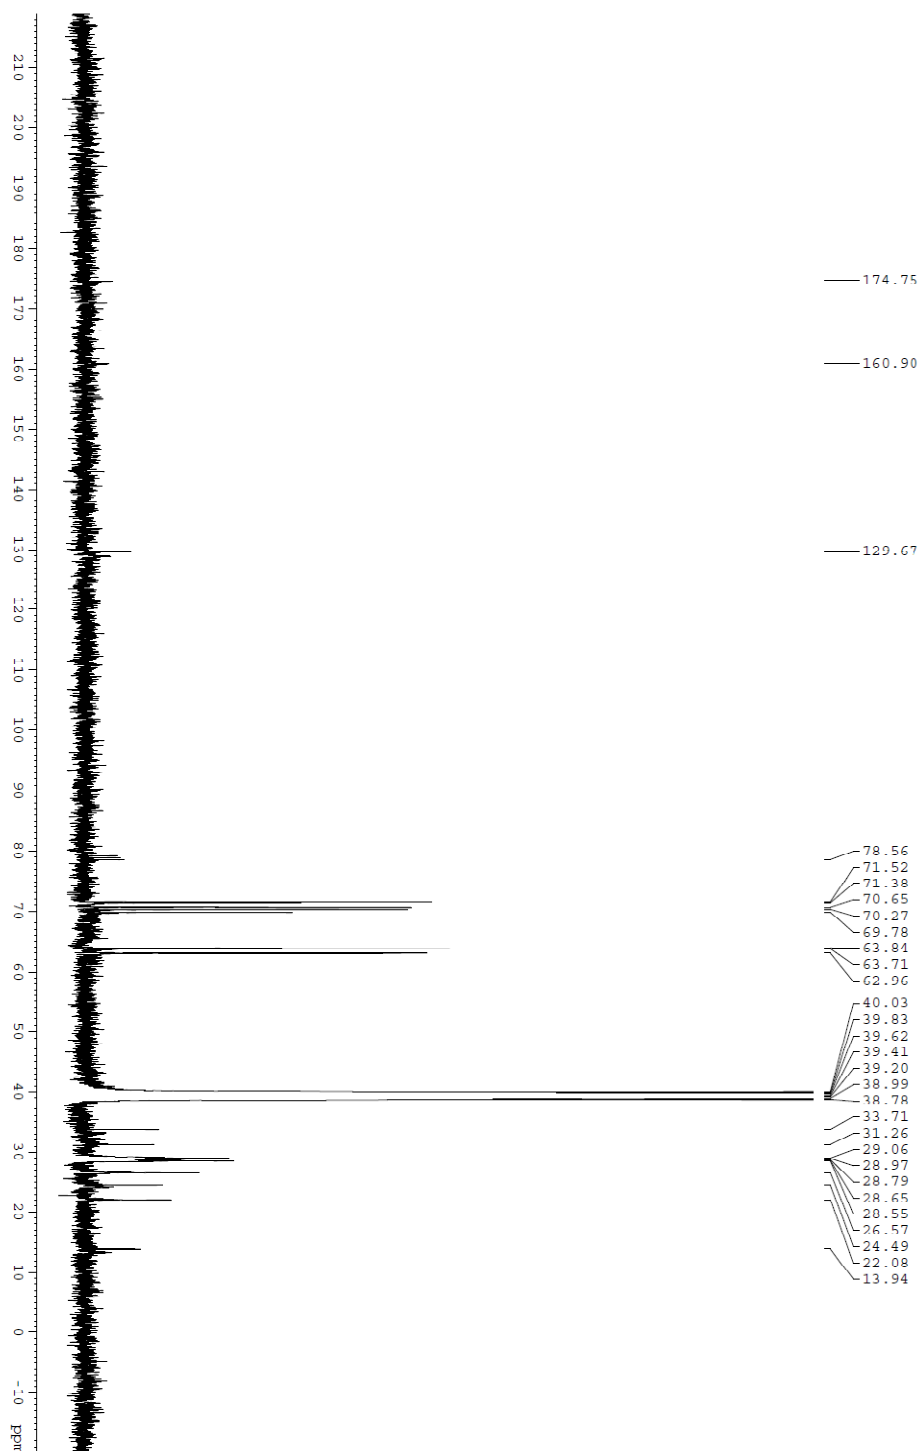

**Figures S17.** Most probable molecules of acids, phenol, alcohol, amide and esters from *Inonotus dryadeus* within the bounds of reasonable and acceptable experimental evidences provided here.

**1. Pentadecanoic acid** Molecular weight: 242.3975 g/mol

Mass observed by High Resolution Mass Spectroscopy (HRMS) low intensity

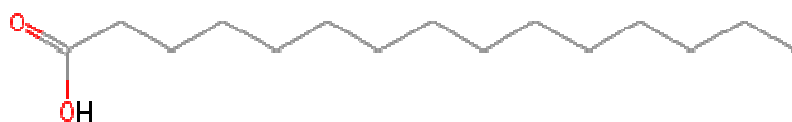

**2. Hexadecanoic acid** Molecular weight: 256.4241 g/mol

Mass observed by High Resolution Mass Spectroscopy (HRMS) low intensity

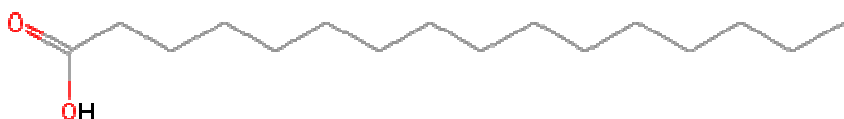

**3. 9,12-Octadecadienoic acid (Z,Z)-**Molecular weight: 280.4455 g/mol

Mass observed by High Resolution Mass Spectroscopy (HRMS) ~ 281 (low intensity)

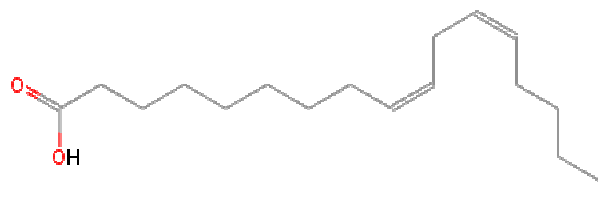

**4. Octadecanoic acid** Molecular weight: 284 g/mol

Mass observed by High Resolution Mass Spectroscopy (HRMS) ~281 (low intensity)

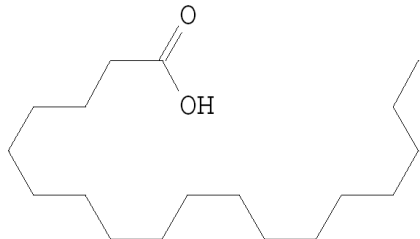

**5. Arachidonic acid** Molecular weight: 304.4669 g/mol

Mass observed by High Resolution Mass Spectroscopy (HRMS) 301.1404

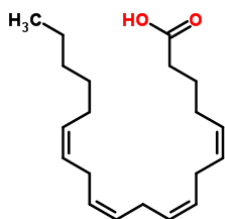



## Phenol

1. Phenol, 4,4'-methylenebis[2,6-bis(1,1-dimethylethyl)- Mol. Wt.: 424.6585 g/mol

Mass observed by High Resolution Mass Spectroscopy (HRMS) 437.6585

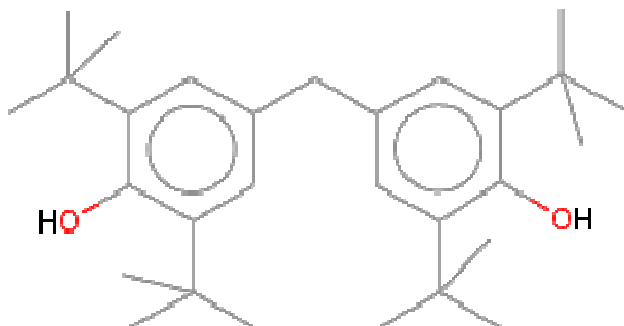

## Ethanol

1. Ethanol, 2-(9,12-octadecadienyloxy)-, (Z,Z) Mol. Wt.: 310.5145 g/mol

Mass observed by High Resolution Mass Spectroscopy (HRMS) 301.1404

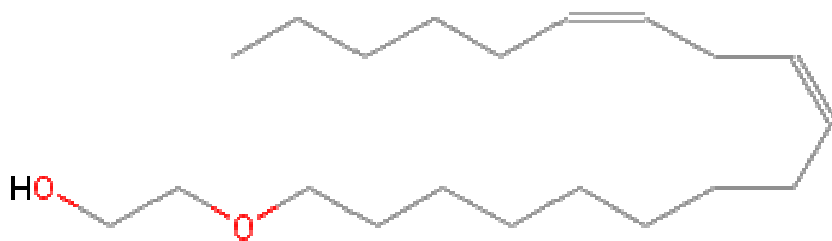

## Amide

1. 2,3,4,5,6-Pentafluoro-N-(4-methoxyphenyl) benzamide Mol. Wt.: 285.1938 g/mol

Mass observed by High Resolution Mass Spectroscopy (HRMS) ~281 (low intensity)

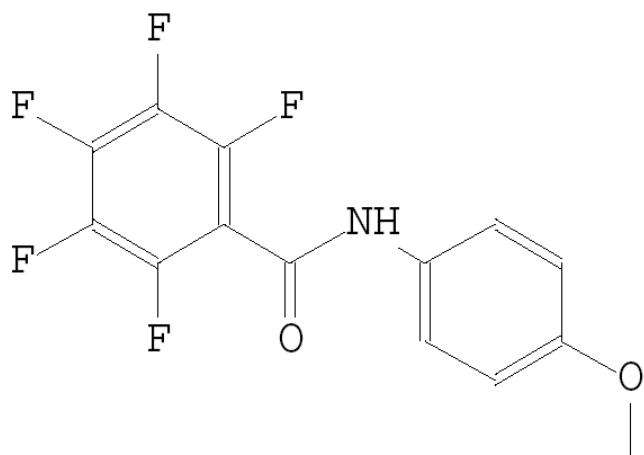

## Esters

### 1. Isophthalic acid, di(2-isopropylphenyl) ester

Mol. Wt.: 402.4822 g/mol

Mass observed by High Resolution Mass Spectroscopy (HRMS)

397.2718

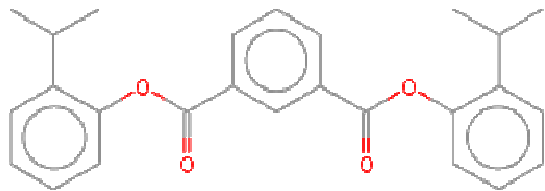

### 2. 9,12,15-Octadecatrienoic acid, 2-phenyl-1,3-dioxan-5-yl ester

Mol. Wt.: 440 g/mol

Mass observed by High Resolution Mass Spectroscopy (HRMS) 437.1937

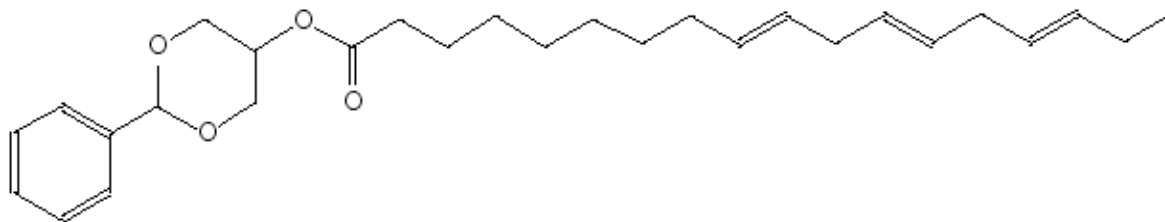

### 3. L-(+)-Ascorbic acid 2,6-dihexadecanoate

Molecular weight: 652.94172 g/mol

Mass observed by High Resolution Mass Spectroscopy (HRMS) 647.5597

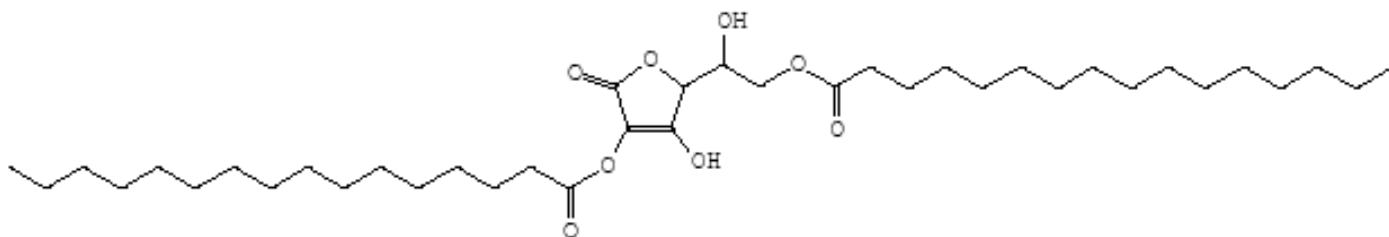

### 4. Isophthalic acid, dodecyl 2-isopropylphenyl ester

Mol. Wt.: 452 g/mol

Mass observed by High Resolution Mass Spectroscopy (HRMS) 453.1667

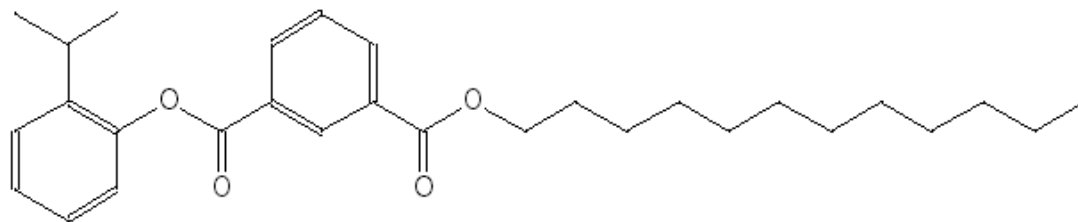

**5. 9-Octadecenoic acid, 1,2,3-propanetriyl ester, (E,E,E)-**

Mol. Wt.: 884 g/mol

Mass observed by High Resolution Mass Spectroscopy (HRMS) 884 matching with low intensity

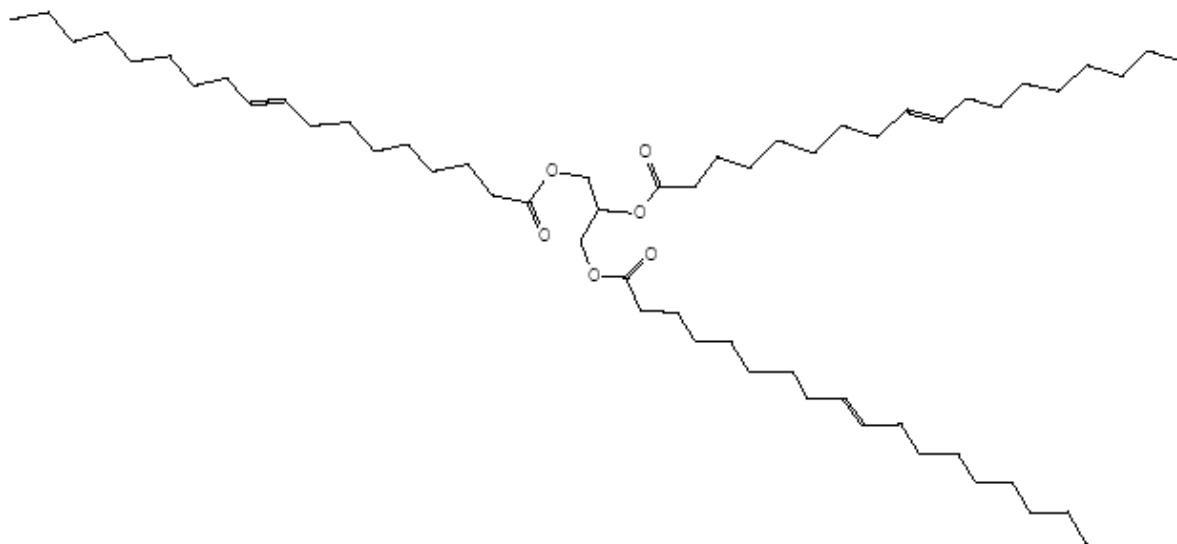

**6. 9-Octadecenoic acid, 1,2,3-propanetriyl ester, (E,E,E)-Mol. Wt.: 884 g/mol**

Mass observed by High Resolution Mass Spectroscopy (HRMS) 875.5192

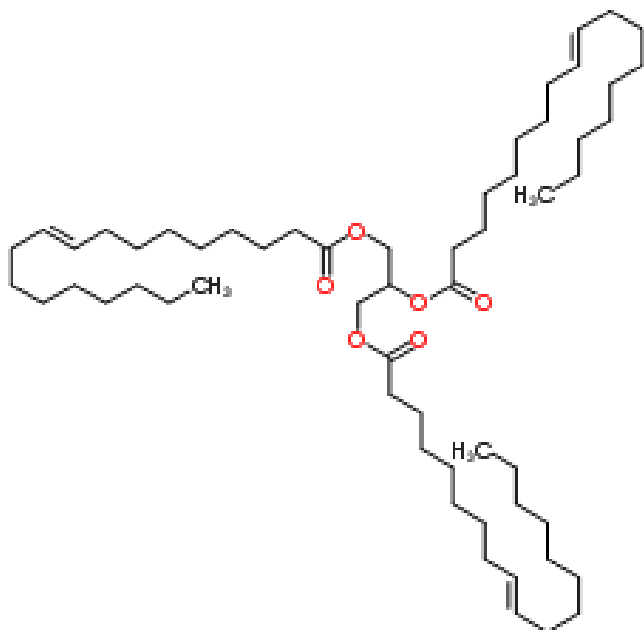

## Other molecules

### 1. 1-Aminononadecane, N-trifluoroacetyl-Mol. Wt.: 379 g/mol

Mass observed by High Resolution Mass Spectroscopy (HRMS) 381.2975 high intensity

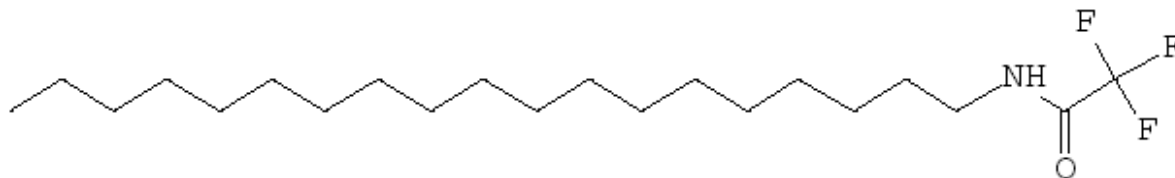

### 2. Sitosterol acetate Molecular weight: 456 g/mol

Mass observed by High Resolution Mass Spectroscopy (HRMS) 453.1667

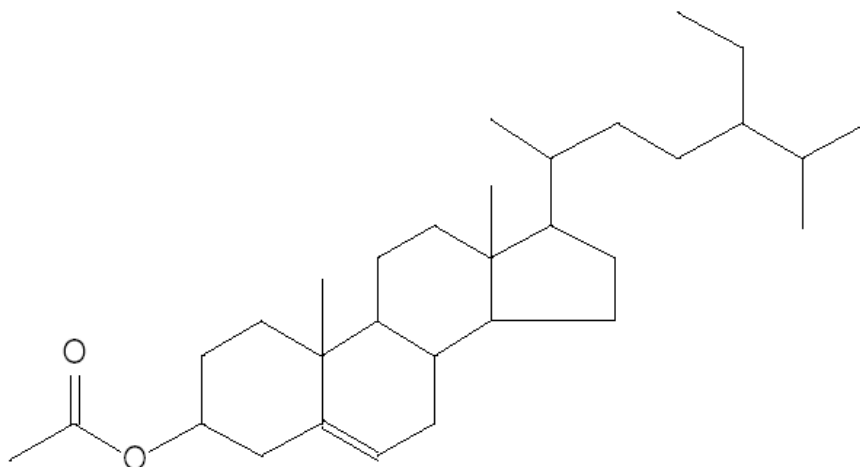

### 3. Stigmast-5-en-3-ol, oleate \$\$ Stigmast-5-en-3-yl (9Z)-9-octadecenoate

Mol. Wt.: 678 g/mol

Mass observed by High Resolution Mass Spectroscopy (HRMS) ~678 matching

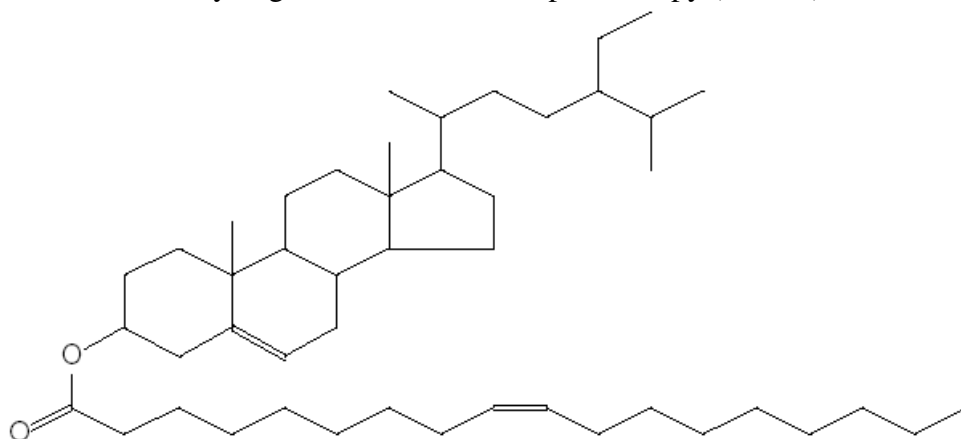

Supplement: Supplementary file 1 [file 4931008]
